# Supplementary material
Source: publisher figshare collection journal article supplement (https://acs.figshare.com/ndownloader/files/26379898)
Supplement: Supplementary file 1 [file 26379898]

# Synthesis and Characterization of Biobased Polyesters with Tunable $T_g$ by ROCOP of Beta-Elemene Oxides and Phthalic Anhydride

Francesco Della Monica\* and Arjan W. Kleij\*

\* **Francesco Della Monica** – Institute of Chemical Research of Catalonia (ICIQ), The Barcelona Institute for Science & Technology (BIST), Av. Països Catalans 16, 43007 Tarragona, Spain; orcid.org/0000-0001-6530-7351; Email: [fdellamonica@iciq.es](mailto:fdellamonica@iciq.es)

\* **Arjan Willem Kleij** – Institute of Chemical Research of Catalonia (ICIQ), The Barcelona Institute for Science & Technology (BIST), Av. Països Catalans 16, 43007 Tarragona, Spain. Catalan Institute of Research and Advanced Studies (ICREA), Pg. Lluís Companys 23, 08010 – Barcelona (Spain); orcid.org/0000-0002-7402-4764; Email: [akleij@iciq.es](mailto:akleij@iciq.es)

## SUPPORTING INFORMATION

57 pages, 84 figures, 2 tables

|                                                                                                                                                                                                                          |    |
|--------------------------------------------------------------------------------------------------------------------------------------------------------------------------------------------------------------------------|----|
| General Considerations .....                                                                                                                                                                                             | 5  |
| Reagents and Complexes .....                                                                                                                                                                                             | 5  |
| Reaction Conditions Screening for $\beta$ -elemene Epoxidation .....                                                                                                                                                     | 6  |
| <b>Scheme S1</b> Possible stereoisomers for <b>BEM</b> , <b>BED</b> and <b>BET</b> obtained after $\beta$ -elemene epoxidation. ....                                                                                     | 6  |
| <b>Table S1</b> Epoxidation of <b>BE</b> with <i>m</i> CPBA. ....                                                                                                                                                        | 6  |
| Synthesis of $\beta$ -elemene monoxide (BEM) .....                                                                                                                                                                       | 7  |
| <b>Figure S1</b> APCI-HRMS spectra of of a 3,4- <b>BEM</b> /11,12- <b>BEM</b> mixture. ....                                                                                                                              | 7  |
| Synthesis of $\beta$ -elemene dioxide (BED) .....                                                                                                                                                                        | 8  |
| <b>Figure S2</b> ESI-HRMS spectra of <b>BED</b> . ....                                                                                                                                                                   | 8  |
| Synthesis of $\beta$ -elemene trioxide (BET) .....                                                                                                                                                                       | 9  |
| <b>Figure S3</b> ESI-HRMS spectra of <b>BET</b> . ....                                                                                                                                                                   | 9  |
| Reaction Conditions Screening for the ROCOP of BEM/PA .....                                                                                                                                                              | 10 |
| <b>Table S2</b> ROCOP of <b>BEM</b> with <b>PA</b> . ....                                                                                                                                                                | 10 |
| General Procedure for the ROCOP of BEM/PA in Toluene (entry 1, Table 1) .....                                                                                                                                            | 11 |
| <b>Figure S4</b> $^1\text{H}$ NMR spectra of an aliquot of the reaction mixture for the formation of poly( <b>BEM-<i>alt</i>-PA</b> ) to determine the conversion (entry 1, Table 1) ( $\text{CDCl}_3$ , 400 MHz). ....  | 11 |
| General Procedure for the ROCOP of BEM/PA without Solvent (entry 5, Table 1) .....                                                                                                                                       | 12 |
| <b>Figure S5</b> $^1\text{H}$ NMR spectra of an aliquot of the reaction mixture for the formation of poly( <b>BEM-<i>alt</i>-PA</b> ) to determine the conversion (entry 5, Table 1) ( $\text{CDCl}_3$ , 400 MHz). ....  | 12 |
| Gram-scale ROCOP of BEM/PA in Toluene (entry 6, Table 1) .....                                                                                                                                                           | 12 |
| Gram-scale ROCOP of BEM/PA without solvent (entry 7, Table 1) .....                                                                                                                                                      | 12 |
| General Procedure for the ROCOP of BED/PA in Toluene (entry 8, Table 1) .....                                                                                                                                            | 13 |
| <b>Figure S6</b> $^1\text{H}$ NMR spectra of an aliquot of the reaction mixture for the formation of poly( <b>BED-<i>alt</i>-PA</b> ) to determine the conversion (entry 8, Table 1) ( $\text{CDCl}_3$ , 400 MHz). ....  | 13 |
| General Procedure for the ROCOP of BED/PA without Solvent (entry 11, Table 1) .....                                                                                                                                      | 14 |
| <b>Figure S7</b> $^1\text{H}$ NMR spectra of an aliquot of the reaction mixture for the formation of poly( <b>BED-<i>alt</i>-PA</b> ) to determine the conversion (entry 11, Table 1) ( $\text{CDCl}_3$ , 400 MHz). .... | 14 |
| Epoxidation of Poly( <b>BEM-<i>alt</i>-PA</b> ) to Poly( <b>BED-<i>alt</i>-PA</b> ) .....                                                                                                                                | 15 |
| Epoxidation of Poly( <b>BEM-<i>alt</i>-PA</b> ) to Poly( <b>BET-<i>alt</i>-PA</b> ) .....                                                                                                                                | 15 |
| NMR Characterization of <b>BE</b> .....                                                                                                                                                                                  | 16 |
| <b>Figure S8</b> $^1\text{H}$ NMR of <b>BE</b> (400 MHz, rt, $\text{CDCl}_3$ ). ....                                                                                                                                     | 16 |
| <b>Figure S9</b> $^{13}\text{C}$ NMR of <b>BE</b> (400 MHz, rt, $\text{CDCl}_3$ ). ....                                                                                                                                  | 16 |
| <b>Figure S10</b> $^1\text{H}$ - $^1\text{H}$ COSY NMR of <b>BE</b> (400 MHz, rt, $\text{CDCl}_3$ ). ....                                                                                                                | 17 |
| <b>Figure S11</b> $^1\text{H}$ - $^1\text{H}$ COSY NMR of <b>BE</b> from 6.0 to 4.3 ppm (400 MHz, rt, $\text{CDCl}_3$ ). ....                                                                                            | 17 |
| <b>Figure S12</b> $^1\text{H}$ - $^1\text{H}$ COSY NMR of <b>BE</b> from 2.4 to 0.7 ppm (400 MHz, rt, $\text{CDCl}_3$ ). ....                                                                                            | 18 |
| <b>Figure S13</b> $^1\text{H}$ - $^{13}\text{C}$ HSQC NMR of <b>BE</b> (400 MHz, rt, $\text{CDCl}_3$ ). ....                                                                                                             | 18 |
| NMR Characterization of <b>BEM</b> .....                                                                                                                                                                                 | 19 |
| <b>Figure S14</b> $^1\text{H}$ NMR of <b>BEM</b> (400 MHz, rt, $\text{CDCl}_3$ ). ....                                                                                                                                   | 19 |
| <b>Figure S15</b> $^{13}\text{C}$ NMR of <b>BEM</b> (400 MHz, rt, $\text{CDCl}_3$ ). ....                                                                                                                                | 19 |
| <b>Figure S16</b> $^1\text{H}$ - $^1\text{H}$ COSY NMR of <b>BEM</b> (400 MHz, rt, $\text{CDCl}_3$ ). ....                                                                                                               | 20 |
| <b>Figure S17</b> $^1\text{H}$ - $^1\text{H}$ COSY NMR of <b>BEM</b> from 6.5 to 4.2 ppm (400 MHz, rt, $\text{CDCl}_3$ ). ....                                                                                           | 20 |
| <b>Figure S18</b> $^1\text{H}$ - $^1\text{H}$ COSY NMR of <b>BEM</b> from 3.0 to 0.7 ppm (400 MHz, rt, $\text{CDCl}_3$ ). ....                                                                                           | 21 |
| <b>Figure S19</b> $^1\text{H}$ - $^{13}\text{C}$ HSQC NMR of <b>BEM</b> (400 MHz, rt, $\text{CDCl}_3$ ). ....                                                                                                            | 21 |

|                                                                                                                                                                |    |
|----------------------------------------------------------------------------------------------------------------------------------------------------------------|----|
| NMR Characterization of 11,12-BEM .....                                                                                                                        | 22 |
| <b>Figure S20</b> <sup>1</sup> H NMR of 11,12-BEM (400 MHz, rt, CDCl <sub>3</sub> ) .....                                                                      | 22 |
| <b>Figure S21</b> <sup>13</sup> C NMR of 11,12-BEM (400 MHz, rt, CDCl <sub>3</sub> ) .....                                                                     | 22 |
| <b>Figure S22</b> <sup>1</sup> H- <sup>1</sup> H COSY NMR of 11,12-BEM (400 MHz, rt, CDCl <sub>3</sub> ) .....                                                 | 23 |
| <b>Figure S23</b> <sup>1</sup> H- <sup>1</sup> H COSY NMR of 11,12-BEM from 6.0 to 4.3 ppm (400 MHz, rt, CDCl <sub>3</sub> ) .....                             | 23 |
| <b>Figure S24</b> <sup>1</sup> H- <sup>1</sup> H COSY NMR of 11,12-BEM from 3.0 to 0.7 ppm (400 MHz, rt, CDCl <sub>3</sub> ) .....                             | 24 |
| <b>Figure S25</b> <sup>1</sup> H- <sup>13</sup> C HSQC NMR of 11,12-BEM (400 MHz, rt, CDCl <sub>3</sub> ) .....                                                | 24 |
| NMR Characterization of BED .....                                                                                                                              | 25 |
| <b>Figure S26</b> <sup>1</sup> H NMR of BED (400 MHz, rt, CDCl <sub>3</sub> ) .....                                                                            | 25 |
| <b>Figure S27</b> <sup>13</sup> C NMR of BED (400 MHz, rt, CDCl <sub>3</sub> ) .....                                                                           | 25 |
| <b>Figure S28</b> <sup>1</sup> H- <sup>1</sup> H COSY NMR of BED (400 MHz, rt, CDCl <sub>3</sub> ) .....                                                       | 26 |
| <b>Figure S29</b> <sup>1</sup> H- <sup>1</sup> H COSY NMR of BED from 6.3 to 4.5 ppm (400 MHz, rt, CDCl <sub>3</sub> ) .....                                   | 26 |
| <b>Figure S30</b> <sup>1</sup> H- <sup>1</sup> H COSY NMR of BED from 3.0 to 0.7 ppm (400 MHz, rt, CDCl <sub>3</sub> ) .....                                   | 27 |
| <b>Figure S31</b> <sup>1</sup> H- <sup>13</sup> C HSQC NMR of BED (400 MHz, rt, CDCl <sub>3</sub> ) .....                                                      | 27 |
| NMR Characterization of BET .....                                                                                                                              | 28 |
| <b>Figure S32</b> <sup>1</sup> H NMR of BET (400 MHz, rt, CDCl <sub>3</sub> ) .....                                                                            | 28 |
| <b>Figure S33</b> <sup>13</sup> C NMR of BET (400 MHz, rt, CDCl <sub>3</sub> ) .....                                                                           | 28 |
| <b>Figure S34</b> <sup>1</sup> H- <sup>1</sup> H COSY NMR of BET (400 MHz, rt, CDCl <sub>3</sub> ) .....                                                       | 29 |
| <b>Figure S35</b> <sup>1</sup> H- <sup>13</sup> C HSQC NMR of BET (400 MHz, rt, CDCl <sub>3</sub> ) .....                                                      | 29 |
| NMR Characterization of Poly(BEM- <i>alt</i> -PA) .....                                                                                                        | 30 |
| <b>Figure S36</b> <sup>1</sup> H NMR of poly(BEM- <i>alt</i> -PA) (400 MHz, rt, CDCl <sub>3</sub> ) .....                                                      | 30 |
| <b>Figure S37</b> <sup>13</sup> C NMR of poly(BEM- <i>alt</i> -PA) (400 MHz, rt, CDCl <sub>3</sub> ) .....                                                     | 30 |
| <b>Figure S38</b> <sup>1</sup> H- <sup>1</sup> H COSY NMR of poly(BEM- <i>alt</i> -PA) (400 MHz, rt, CDCl <sub>3</sub> ) .....                                 | 31 |
| <b>Figure S39</b> <sup>1</sup> H- <sup>1</sup> H COSY NMR of poly(BEM- <i>alt</i> -PA) from 6.0 to 4.0 ppm (400 MHz, rt, CDCl <sub>3</sub> ) .....             | 31 |
| <b>Figure S40</b> <sup>1</sup> H- <sup>1</sup> H COSY NMR of poly(BEM- <i>alt</i> -PA) from 2.6 to 0.7 ppm (400 MHz, rt, CDCl <sub>3</sub> ) .....             | 32 |
| <b>Figure S41</b> <sup>1</sup> H- <sup>13</sup> C HSQC NMR of poly(BEM- <i>alt</i> -PA) (400 MHz, rt, CDCl <sub>3</sub> ) .....                                | 32 |
| NMR Characterization of Crosslinked Poly(BED- <i>alt</i> -PA) .....                                                                                            | 33 |
| <b>Figure S42</b> <sup>1</sup> H NMR of crosslinked poly(BED- <i>alt</i> -PA) (400 MHz, rt, CDCl <sub>3</sub> ) .....                                          | 33 |
| <b>Figure S43</b> <sup>13</sup> C NMR of crosslinked poly(BED- <i>alt</i> -PA) (400 MHz, rt, CDCl <sub>3</sub> ) .....                                         | 33 |
| <b>Figure S44</b> <sup>1</sup> H- <sup>1</sup> H COSY NMR of crosslinked poly(BED- <i>alt</i> -PA) (400 MHz, rt, CDCl <sub>3</sub> ) .....                     | 34 |
| <b>Figure S45</b> <sup>1</sup> H- <sup>1</sup> H COSY NMR of crosslinked poly(BED- <i>alt</i> -PA) from 6.5 to 4.2 ppm (400 MHz, rt, CDCl <sub>3</sub> ) ..... | 34 |
| <b>Figure S46</b> <sup>1</sup> H- <sup>1</sup> H COSY NMR of crosslinked poly(BED- <i>alt</i> -PA) from 3.0 to 0.6 ppm (400 MHz, rt, CDCl <sub>3</sub> ) ..... | 35 |
| <b>Figure S47</b> <sup>1</sup> H- <sup>13</sup> C HSQC NMR of crosslinked poly(BED- <i>alt</i> -PA) (400 MHz, rt, CDCl <sub>3</sub> ) .....                    | 35 |
| NMR Characterization of Poly(BED- <i>alt</i> -PA) .....                                                                                                        | 36 |
| <b>Figure S48</b> <sup>1</sup> H NMR of poly(BED- <i>alt</i> -PA) (400 MHz, rt, CDCl <sub>3</sub> ) .....                                                      | 36 |
| <b>Figure S49</b> <sup>13</sup> C NMR of poly(BED- <i>alt</i> -PA) (400 MHz, rt, CDCl <sub>3</sub> ) .....                                                     | 36 |
| <b>Figure S50</b> <sup>1</sup> H- <sup>1</sup> H COSY NMR of poly(BED- <i>alt</i> -PA) (400 MHz, rt, CDCl <sub>3</sub> ) .....                                 | 37 |
| <b>Figure S51</b> <sup>1</sup> H- <sup>1</sup> H COSY NMR of poly(BED- <i>alt</i> -PA) from 6.0 to 4.0 ppm (400 MHz, rt, CDCl <sub>3</sub> ) .....             | 37 |
| <b>Figure S52</b> <sup>1</sup> H- <sup>1</sup> H COSY NMR of poly(BED- <i>alt</i> -PA) from 3.1 to 0.6 ppm (400 MHz, rt, CDCl <sub>3</sub> ) .....             | 38 |
| <b>Figure S53</b> <sup>1</sup> H- <sup>13</sup> C HSQC NMR of poly(BED- <i>alt</i> -PA) (400 MHz, rt, CDCl <sub>3</sub> ) .....                                | 38 |
| NMR Characterization of Poly(BET- <i>alt</i> -PA) .....                                                                                                        | 39 |
| <b>Figure S54</b> <sup>1</sup> H NMR of poly(BET- <i>alt</i> -PA) (400 MHz, rt, CDCl <sub>3</sub> ) .....                                                      | 39 |

|                                                                                                                                                     |    |
|-----------------------------------------------------------------------------------------------------------------------------------------------------|----|
| <b>Figure S55</b> $^{13}\text{C}$ NMR of poly( <b>BET-<i>alt</i>-PA</b> ) (400 MHz, rt, $\text{CDCl}_3$ ).....                                      | 39 |
| <b>Figure S56</b> $^1\text{H}$ - $^1\text{H}$ COSY NMR of poly( <b>BET-<i>alt</i>-PA</b> ) (400 MHz, rt, $\text{CDCl}_3$ ).....                     | 40 |
| <b>Figure S57</b> $^1\text{H}$ - $^1\text{H}$ COSY NMR of poly( <b>BET-<i>alt</i>-PA</b> ) from 6.0 to 4.3 ppm (400 MHz, rt, $\text{CDCl}_3$ )..... | 40 |
| <b>Figure S58</b> $^1\text{H}$ - $^1\text{H}$ COSY NMR of poly( <b>BET-<i>alt</i>-PA</b> ) from 3.0 to 0.6 ppm (400 MHz, rt, $\text{CDCl}_3$ )..... | 41 |
| <b>Figure S59</b> $^1\text{H}$ - $^{13}\text{C}$ HSQC NMR of poly( <b>BET-<i>alt</i>-PA</b> ) (400 MHz, rt, $\text{CDCl}_3$ ).....                  | 41 |
| Gas chromatography–mass spectrometry analyses of BEM .....                                                                                          | 42 |
| <b>Figure S60</b> GC-MS analysis of a 3,4- <b>BEM</b> /11,12- <b>BEM</b> mixture (49:51 ratio by NMR). .....                                        | 42 |
| <b>Figure S61</b> GC-MS analysis of a 3,4- <b>BEM</b> /11,12- <b>BEM</b> mixture (20:80 ratio by NMR). .....                                        | 43 |
| Gel Permeation Chromatography of BE-Based Polyesters.....                                                                                           | 44 |
| <b>Figure S62</b> GPC trace of poly( <b>BEM-<i>alt</i>-PA</b> ) sample related to entry 1 table 1.....                                              | 44 |
| <b>Figure S63</b> GPC trace of poly( <b>BEM-<i>alt</i>-PA</b> ) sample related to entry 2 table 1.....                                              | 44 |
| <b>Figure S64</b> GPC trace of poly( <b>BEM-<i>alt</i>-PA</b> ) sample related to entry 6 Table 1.....                                              | 45 |
| <b>Figure S65</b> GPC trace of poly( <b>BEM-<i>alt</i>-PA</b> ) sample related to entry 7 Table 1.....                                              | 45 |
| <b>Figure S66</b> GPC trace of THF-soluble fraction of crosslinked poly( <b>BED-<i>alt</i>-PA</b> ) sample related to entry 8 Table 1. ....         | 46 |
| <b>Figure S67</b> GPC trace of THF-soluble fraction of crosslinked poly( <b>BED-<i>alt</i>-PA</b> ) sample related to entry 11 Table 1. ....        | 46 |
| <b>Figure S68</b> GPC trace of poly( <b>BED-<i>alt</i>-PA</b> ). .....                                                                              | 47 |
| <b>Figure S69</b> GPC trace of poly( <b>BET-<i>alt</i>-PA</b> ). .....                                                                              | 47 |
| Matrix-Assisted Laser Desorption/Ionization Mass Spectrometry of BE-Based Polyesters.....                                                           | 48 |
| <b>Figure S70</b> MALDI-TOF spectrum of poly( <b>BEM-<i>alt</i>-PA</b> ) sample related to entry 7 table 1. ....                                    | 48 |
| <b>Figure S71</b> MALDI-TOF spectrum of poly( <b>BEM-<i>alt</i>-PA</b> ) sample related to entry 2 Table 1. ....                                    | 49 |
| Differential Scanning Calorimetry of BE-Based Polyesters.....                                                                                       | 50 |
| <b>Figure S72</b> DSC thermogram of poly( <b>BEM-<i>alt</i>-PA</b> ) sample related to entry 6 Table 1. ....                                        | 50 |
| <b>Figure S73</b> DSC thermogram of poly( <b>BEM-<i>alt</i>-PA</b> ) sample related to entry 7 Table 1. ....                                        | 50 |
| <b>Figure S74</b> DSC thermogram of crosslinked poly( <b>BED-<i>alt</i>-PA</b> ) sample related to entry 8 Table 1.....                             | 51 |
| <b>Figure S75</b> DSC thermogram of crosslinked poly( <b>BED-<i>alt</i>-PA</b> ) sample related to entry 11 Table 1. ....                           | 51 |
| <b>Figure S76</b> DSC thermogram of poly( <b>BED-<i>alt</i>-PA</b> ). .....                                                                         | 52 |
| <b>Figure S77</b> Comparison of first and second cycle of DSC thermogram of poly( <b>BED-<i>alt</i>-PA</b> ). ....                                  | 52 |
| <b>Figure S78</b> DSC thermogram of poly( <b>BET-<i>alt</i>-PA</b> ). .....                                                                         | 53 |
| Thermogravimetric Analyses of BE-Based Polyesters.....                                                                                              | 54 |
| <b>Figure S79</b> TGA thermogram of poly( <b>BEM-<i>alt</i>-PA</b> ) sample related to entry 6 Table 1. ....                                        | 54 |
| <b>Figure S80</b> TGA thermogram of poly( <b>BED-<i>alt</i>-PA</b> ) sample related to entry 7 Table 1.....                                         | 54 |
| <b>Figure S81</b> TGA thermogram of crosslinked poly( <b>BED-<i>alt</i>-PA</b> ) sample related to entry 8 Table 1.....                             | 55 |
| <b>Figure S82</b> TGA thermogram of crosslinked poly( <b>BED-<i>alt</i>-PA</b> ) sample related to entry 11 Table 1.....                            | 55 |
| <b>Figure S83</b> TGA thermogram of poly( <b>BED-<i>alt</i>-PA</b> ). .....                                                                         | 56 |
| <b>Figure S84</b> TGA thermogram of poly( <b>BET-<i>alt</i>-PA</b> ). .....                                                                         | 56 |
| References.....                                                                                                                                     | 57 |

## General Considerations

All water-sensitive operations were carried out under a nitrogen atmosphere using an MBraun glovebox, standard vacuum line, and Schlenk techniques. Solvents were purchased from Sigma-Aldrich (HPLC grade) and dried using an MBraun MBSPS800 purification system. NMR spectra were recorded on a Bruker AV-400 spectrometer operating at 400 MHz to collect  $^1\text{H}$  and 100 MHz for  $^{13}\text{C}$  NMR spectral data.  $^1\text{H}$  NMR spectra are referenced to the residual solvent peak at  $\delta$  7.26 ppm for  $\text{CDCl}_3$ .  $^{13}\text{C}$  NMR spectra are referenced to the residual solvent peak at  $\delta$  77.16 ppm for  $\text{CDCl}_3$ . Differential scanning calorimetry (DSC) analyses for determination of the glass transition temperatures ( $T_g$ ) were measured under a  $\text{N}_2$  atmosphere using a Mettler Toledo equipment (model DSC822e). Samples were weighed into 40  $\mu\text{L}$  aluminum crucibles and subjected to two heating cycles at a heating rate of 10  $^\circ\text{C}/\text{min}$ . Thermogravimetric analyses (TGA) were recorded under air atmosphere using Mettler Toledo equipment (model TGA/SDTA851). Samples were weighed into 40  $\mu\text{L}$  aluminum crucibles and heated to 600  $^\circ\text{C}$  at a heating rate of 10  $^\circ\text{C}/\text{min}$ . Gel permeation chromatography (GPC) measurements were performed using an Agilent 1200 series HPLC system, equipped with PSS SDV Analytical linear M GPC column (8 x 300 mm; 5  $\mu\text{m}$  particle size) in tetrahydrofuran at 30  $^\circ\text{C}$  at a flow rate of 1  $\text{mL}\cdot\text{min}^{-1}$ . Samples were analyzed at a concentration of 1  $\text{mg}\cdot\text{mL}^{-1}$  after filtration through a 0.45  $\mu\text{m}$  pore-size membrane.  $M_n$ ,  $M_w$ , and  $\bar{D}$  data were derived from the RI signal by a calibration curve based on polystyrene standards (PS from Polymer Standards Service) for the analysis of the polymers. The crosslinked poly(**BED-alt-PA**) GPC samples were prepared by extracting the polymer (3-4 mg) with THF (2 mL), shaking the suspension for 10 minutes with an ultrasonic bath at room temperature and filtering the solution through a 0.45  $\mu\text{m}$  pore-size membrane. Gas-chromatography mass (GC-MS) analyses were performed using an Agilent equipment (model 6890N, with MSD model 5973) equipped with a HP5 column (30m x 0.25 mm, 0.25  $\mu\text{m}$ ) via direct injection (280  $^\circ\text{C}$ ) in MeOH-formic acid 0.1% and ESI as ionization mode with the following temperature program: 80 $^\circ\text{C}$  (110') - 325 $^\circ\text{C}$  (5') / 20  $^\circ\text{C}\cdot\text{min}^{-1}$ , at a flow rate of 1.5  $\text{mL}\cdot\text{min}^{-1}$ . Matrix-assisted laser desorption/ionization time-of-flight mass spectrometry (MALDI-TOF) was performed by the on a BRUKER Autoflex spectrometer using the following conditions: sample (4  $\mu\text{L}$ , 1  $\text{mg}/\text{mL}$ ), dithranol as a matrix (20  $\mu\text{L}$ , 10  $\text{mg}/\text{mL}$ ) and  $\text{CF}_3\text{COONa}$  as an additive (1  $\mu\text{L}$ , 1  $\text{mg}/\text{mL}$ ).

## Reagents and Complexes

All reagents were purchased from commercial suppliers (Aldrich and Acros) and used as received. Phthalic anhydride (**PA**) is commercially available and was used after recrystallization from hot chloroform and drying under vacuum for 48 h. The additive bis(triphenylphosphine)iminium chloride (PPNCl) is commercially available and was used after recrystallization from dichloromethane and drying under vacuum for 48 h.  $\beta$ -elemene was kindly provided by Isobionics.<sup>1</sup> The complexes **1**<sup>2</sup> and **2**<sup>3</sup> were prepared following previously reported procedures.  $\beta$ -elemene monoxides (**BEM**) and  $\beta$ -elemene dioxides (**BED**) were dissolved in dry hexane or dichloromethane, stirred over CaH for 24 h, filtered through Celite and vacuum-dried prior to use in the copolymerization reactions.

## Reaction Conditions Screening for $\beta$ -elemene Epoxidation

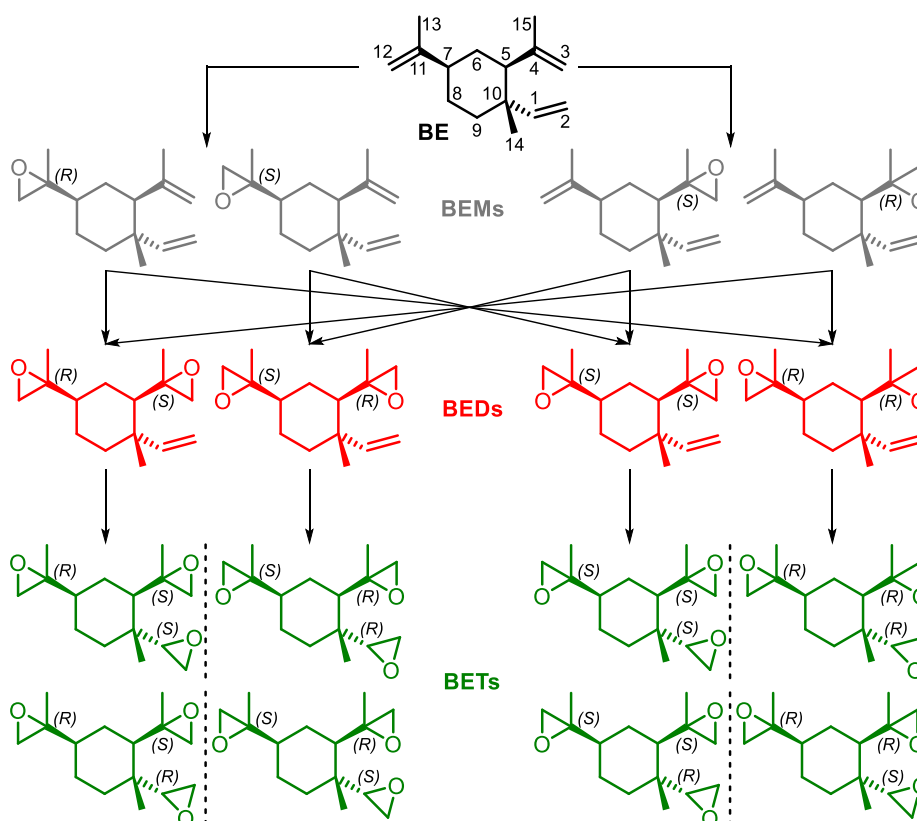

**Scheme S1** Possible stereoisomers for **BEM**, **BED** and **BET** obtained after  $\beta$ -elemene epoxidation.

**Table S1** Epoxidation of **BE** with *m*CPBA.

| Entry          | [ <i>m</i> CPBA]/[ <b>BE</b> ] | Conv <sup>a</sup><br>(%) | <b>BED/BEM</b> <sup>a</sup><br>(%) | Yield<br><b>BEM</b><br>(%) | Yield<br><b>BED</b><br>(%) | Yield<br><b>BET</b><br>(%) | 11,12/3,4 <sup>a</sup><br>(%) | Recovered <b>BE</b><br>(%) |
|----------------|--------------------------------|--------------------------|------------------------------------|----------------------------|----------------------------|----------------------------|-------------------------------|----------------------------|
| 1              | 0.5                            | 47                       | 12/88                              | 41.5                       | n.d.                       | n.d.                       | 63/37                         | 95                         |
| 2              | 0.75                           | 66                       | 19/81                              | 48.2                       | n.d.                       | n.d.                       | 64/36                         | 99                         |
| 3              | 1                              | 73                       | 22/78                              | 53.6                       | n.d.                       | n.d.                       | 66/34                         | 99                         |
| 4 <sup>b</sup> | 1                              | 72                       | 22/78                              | 44.7                       | n.d.                       | n.d.                       | 65/35                         | 90                         |
| 5 <sup>c</sup> | 1                              | 72                       | 22/78                              | 47 (3.54 g)                | n.d.                       | n.d.                       | 66/34                         | 81                         |
| 5 <sup>d</sup> | 1                              | 71                       | 24/76 <sup>e</sup>                 | 49.5                       | 17                         | 0                          | 67/33                         | 81                         |
| 6 <sup>f</sup> | 2.2                            | 100                      | 99/1                               | -                          | 97                         | -                          | -                             | -                          |
| 7 <sup>g</sup> | 3.2                            | 100                      | -                                  | -                          | 18                         | 25                         | -                             | -                          |
| 8 <sup>h</sup> | 3.5                            | 100                      | -                                  | 0                          | 0                          | 32.5                       | -                             | 0                          |

Reaction conditions:  $\beta$ -elemene = 1.00 g (4.9 mmol); [**BE**] = 0.1 M; temperature = 0 °C; reaction time = 1 h. Difference between conversion and yield is due to formation of BE dioxide. a) Determined by <sup>1</sup>H NMR on the basis of signals of methyl 14 on cyclohexyl ring. b)  $\beta$ -elemene = 3.07 g (15.0 mmol). c)  $\beta$ -elemene = 7.0 g. d)  $\beta$ -elemene = 3.0 g. e) from isolated yields. f)  $\beta$ -elemene = 2.00 g; reaction time = 4 h. g)  $\beta$ -elemene = 1.00 g, reaction time = 20 h, T = from 0 to RT. h)  $\beta$ -elemene = 1.00 g, reaction time = 24 h, T = from 0 to r.t.

## Synthesis of $\beta$ -elemene monoxide (BEM)

**BE** (3.00 g, 14.68 mmol) was weighed into a vial and transferred to a 250 mL round-bottomed flask. After dissolving in dichloromethane (147 mL, [**BE**] = 0.1 M), the solution was cooled to 0 °C with an ice bath. *Meta*-chloroperbenzoic acid, *m*CPBA (77 % w/w, 3.29 g, 14.68 mmol) was added portion-wise during 15 minutes, and the suspension was stirred for further 45 min. The suspension was then filtered, washed with cold hexane and the filtrate dried by rotary evaporation. The resulting mixture was suspended in cold hexane and filtered again. The filtrate was dried obtaining a clear liquid. The mixture was dissolved into hexane (50 mL) and washed with a saturated aqueous solution of  $\text{NaHCO}_3$  (50 mL, 4 times). The organic phase was dried over sodium sulfate and dried giving a clear liquid (3.0 g). The mixture was analyzed by  $^1\text{H}$  NMR to determine the conversion (71%). The product was purified by column chromatography (from Hex:Et<sub>2</sub>O = 9:1 to Hex:EtOAc = 9:1) obtaining recovered **BE** (0.72 g, yield = 24%), **BEM** (1.60 g, yield = 49.5%) and **BED** (0.59 g, yield = 17%). APCI-HRMS:  $[\text{C}_{15}\text{H}_{25}\text{O}]^+$  calculated = 221.1900; measured = 221.1897.

The same procedure was scaled up to 7.00 g of **BE** (34.25 mmol), yielding 3.54 g of **BEM** (yield = 47%) (entry 5, Table S1).

### Spectroscopic data of 11,12-**BEM**.

$^1\text{H}$ -NMR (400 MHz,  $\text{CDCl}_3$ , rt):  $\delta$  5.80 (dd, 1H,  $J = 17.8$  Hz,  $J = 10.5$  Hz,  $-\text{CH}=\text{CH}_2$ ); 4.91 (m, 1H,  $-\text{CH}=\text{CH}_2$ ); 4.87 (m, 1H,  $-\text{CH}=\text{CH}_2$ ); 4.83 (m, 1H,  $-\text{C}=\text{CH}_2$ ); 4.59 (m, 1H,  $-\text{C}=\text{CH}_2$ ); 2.64-2.66 (m, 1H,  $-\text{COCH}_2$ ); 2.55 (d, 1H,  $J = 4.9$ ,  $-\text{COCH}_2$ ); 1.95 (m, 1H, cyclo  $-\text{CH}$ ); 1.70 (m, 3H,  $-\text{CH}_3$ ); 1.66-1.35 (overlapped m, 6H, cyclo  $-\text{CH}_2-$ ); 1.30 (m, 1H, cyclo  $-\text{CH}$ ); 1.29 (m, 3H,  $-\text{CH}_3$ ); 0.99 (s, 3H,  $-\text{CH}_3$ ).

$^{13}\text{C}$ -NMR (100 MHz,  $\text{CDCl}_3$ , rt):  $\delta$  150.13; 147.59; 147.57; 112.36; 110.16; 110.14; 59.59; 53.61; 53.48; 52.47; 52.47; 52.32; 44.68; 44.60; 40.00; 39.97; 39.53; 39.44; 29.97; 29.51; 24.95; 24.90; 23.99; 23.53; 18.61; 18.45; 16.71; 16.88.

### Spectroscopic data of 3,4-**BEM**.

$^1\text{H}$ -NMR (400 MHz,  $\text{CDCl}_3$ , rt):  $\delta$  5.97 (dd,  $J = 17.5$  Hz,  $J = 10.8$  Hz,  $-\text{CH}=\text{CH}_2$ ) and 5.79 (dd,  $J = 17.5$  Hz,  $J = 10.8$  Hz,  $-\text{CH}=\text{CH}_2$ ) 1H; 5.01-4.93 (m, 2H,  $-\text{CH}=\text{CH}_2$ ); 4.73-4.70 (overlapped m, 2H,  $-\text{C}=\text{CH}_2$ ); 2.68-2.66 (m,  $-\text{COCH}_2$ ) and 2.59 (dd,  $-\text{COCH}_2$ ) and 2.57 (d,  $J = 4.39$  Hz,  $\text{COCH}_2$ ) and 2.41 (d,  $J = 4.95$  Hz,  $\text{COCH}_2$ ) 2H; 1.91-1.82 (m, 1H,  $-\text{CH}$ ); 1.76-1.73 (m, 3H,  $-\text{CH}_3$ ); 1.66-1.35 (overlapped m, 6H, cyclo  $-\text{CH}_2-$ ); 1.30 (m, 1H, cyclo  $-\text{CH}$ ); 1.22 (m, 3H,  $-\text{CH}_3$ ); 1.13-1.09 (m, 3H,  $-\text{CH}_3$ ).

$^{13}\text{C}$ -NMR (100 MHz,  $\text{CDCl}_3$ , rt):  $\delta$  150.60; 150.20; 149.47; 110.72, 109.78; 58.78, 58.15; 56.34; 53.45; 53.37; 51.52; 45.44; 45.25; 41.77; 41.25; 39.42; 31.74; 29.35; 27.08; 26.80; 22.80; 22.63; 21.27; 21.12; 19.95; 17.58; 17.32.

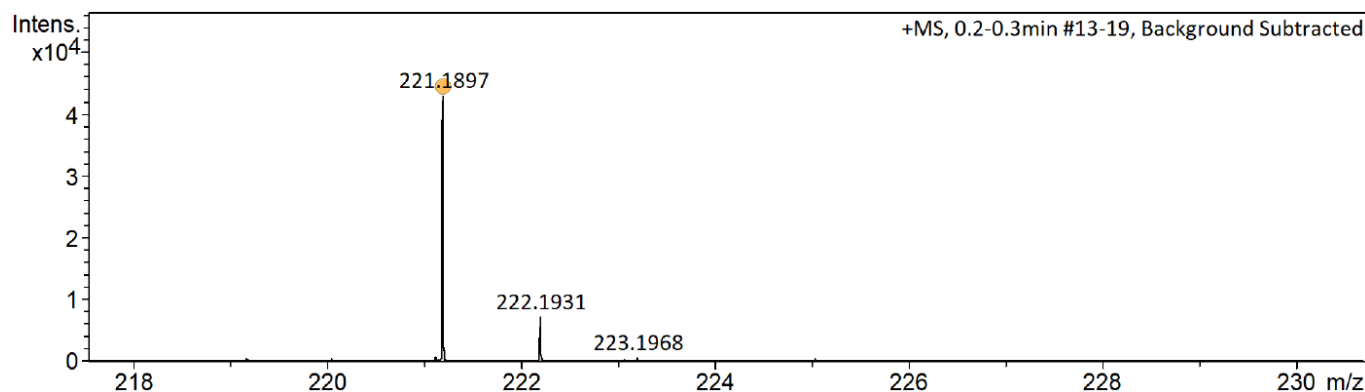

**Figure S1** APCI-HRMS spectra of a 3,4-**BEM**/11,12-**BEM** mixture.

## Synthesis of $\beta$ -elemene dioxide (BED)

**BE** (2.00 g, 9.79 mmol) was weighed into a vial and transferred to a 250 mL round-bottomed flask. After dissolving it into dichloromethane (98 mL, [**BE**] = 0.1 M), the solution was cooled to 0 °C with an ice bath. *m*CPBA (77 % w/w, 4.83 g, 14.68 mmol) was added portion-wise during 22 minutes, and the suspension was stirred at 0 °C. 4 h After the first addition, the suspension was filtered, washed with cold hexane and the filtrate dried by rotary evaporation. The resulting mixture was suspended into cold hexane and filtered again. The filtrate was dried obtaining a clear liquid. The mixture was dissolved into hexane (50 mL) and washed with a saturated aqueous solution of  $\text{NaHCO}_3$  (50 mL, 4 times). The organic phase was dried over sodium sulfate and dried giving **BED** as a clear liquid (2.25 g, yield 97%). ESI-HRMS:  $[\text{C}_{15}\text{H}_{25}\text{O}_2\text{Na}]^+$  calculated = 259.1669; measured = 259.1658.

In some cases, a mixture of **BEM** and **BED** was obtained (up to 85:15), probably due to a lower quality of *m*CPBA. In these cases, the product was re-purified by column chromatography (Hex:EtOAc = 8:2).

### Spectroscopic data of **BED**.

$^1\text{H}$  NMR (400 MHz,  $\text{CDCl}_3$ , rt):  $\delta$  5.96 (*dd*,  $J = 6.4$ ,  $J = 10.8$  Hz,  $-\text{CH}=\text{CH}_2$ ), 5.91 (*dd*,  $J = 6.4$  Hz,  $J = 10.8$  Hz,  $-\text{CH}=\text{CH}_2$ ); 5.76 (*dd*,  $J = 10.6$ ,  $J = 17.4$  Hz,  $-\text{CH}=\text{CH}_2$ ); 5.75 (*dd*,  $J = 10.8$ ,  $J = 17.5$  Hz,  $-\text{CH}=\text{CH}_2$ ); 5.01-5.00 (*m*,  $-\text{CH}=\text{CH}_2$ ); 4.98-4.94 (*m*,  $-\text{CH}=\text{CH}_2$ ); 4.93-4.92 (*m*,  $-\text{CH}=\text{CH}_2$ ); 2.70-2.53 (overlapped *m*,  $-\text{COCH}_2$ ); 2.42 (*dd*,  $J = 4.7$  Hz,  $J = 6.1$  Hz,  $-\text{COCH}_2$ ); 1.84-1.66 (overlapped *m*, cyclo  $-\text{CH}_2$ ); 1.64-1.54 (overlapped *m*, cyclo  $-\text{CH}_2$ ); 1.52-1.23 (overlapped *m*, cyclo  $-\text{CH}_2$  and  $-\text{CH}$ ); 1.31 (*d*,  $J = 0.6$ ,  $-\text{CH}_3$ ); 1.30 (*d*,  $J = 0.6$ ,  $-\text{CH}_3$ ); 1.28 (*m*,  $-\text{CH}_3$ ); 1.27 (*d*,  $J = 0.6$ ,  $-\text{CH}_3$ ); 1.21 (*d*,  $J = 0.6$ ,  $-\text{CH}_3$ ); 1.11 (*s*,  $-\text{CH}_3$ ); 1.10 (*s*,  $-\text{CH}_3$ ); 1.08 (*s*,  $-\text{CH}_3$ ).

$^{13}\text{C}$  NMR (400 MHz,  $\text{CDCl}_3$ , rt):  $\delta$  150.37; 150.18; 148.19; 149.08; 110.90; 110.83; 109.99; 109.93; 59.48; 59.43; 59.36; 58.71; 58.57; 58.02; 56.37; 56.18; 53.70; 53.51; 53.48; 53.14; 53.04; 52.86; 52.82; 51.11; 50.87; 44.21; 44.16; 44.12; 43.31; 41.20; 41.16; 40.72; 40.58; 39.99; 39.41; 39.37; 26.54; 26.09; 26.04; 26.02; 24.02; 23.61; 23.48; 23.18; 22.98; 22.38; 20.02; 19.85; 19.32; 18.49; 18.46; 18.38; 17.50; 17.48; 17.32; 17.13.

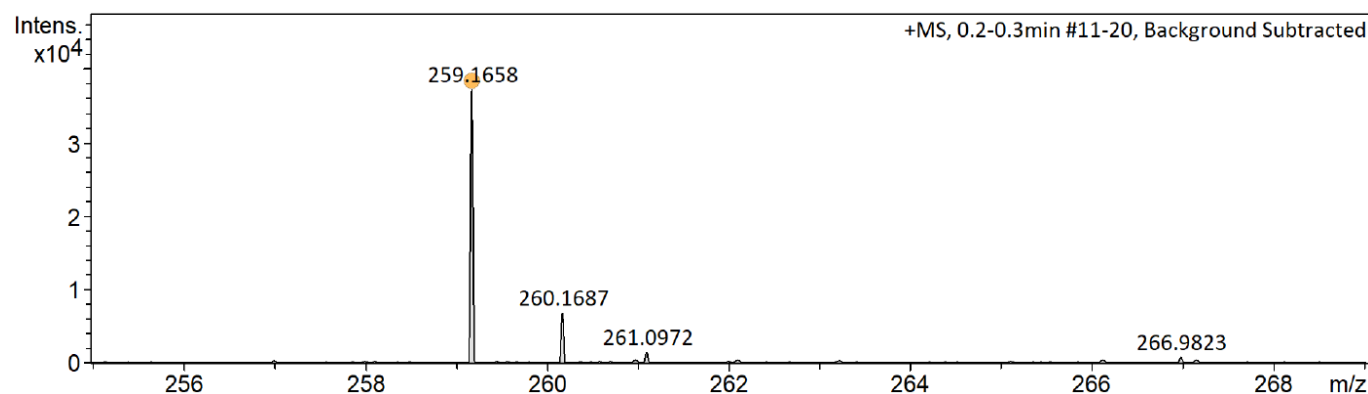

**Figure S2** ESI-HRMS spectra of **BED**.



## Synthesis of $\beta$ -elemene trioxide (BET)

**BE** (1.00 g, 4.89 mmol) was weighed into a vial and transferred to a 100 mL round-bottomed flask. After dissolving it into dichloromethane (49 mL, [**BE**] = 0.1 M), the solution was cooled to 0 °C with an ice bath. *m*CPBA (77 % w/w, 3.51 g, 15.66 mmol) was added portion-wise during 30 minutes, and the suspension was stirred at 0 °C in an ice bath and left warming up to room temperature. After 24 h, the suspension was filtered, washed with cold hexane and the filtrate dried by rotary evaporation. The resulting mixture was suspended into dichloromethane and filtered again two times. The filtrate was dried obtaining a clear liquid, which partially solidified at 0 °C. The mixture was dissolved into dichloromethane (50 mL) and washed with a saturated aqueous solution of NaHCO<sub>3</sub> (50 mL, 4 times). The organic phase was dried over sodium sulfate and dried giving a clear liquid (1.0 g). The mixture was analyzed by <sup>1</sup>H NMR to determine the conversion (100%). The product was purified by column chromatography (from Hex:EtOAc = 8:2 to Hex:EtOAc = 6:4) obtaining **BET** (0.40 g, yield = 32.5%). ESI-HRMS: [C<sub>15</sub>H<sub>24</sub>O<sub>3</sub>Na]<sup>+</sup> calculated = 275.1618; measured = 275.1617.

Spectroscopic data of **BET**.

<sup>1</sup>H NMR (400 MHz, CDCl<sub>3</sub>, rt):  $\delta$  2.9-2.46 (overlapped *m*, 7H, -CHOCH<sub>2</sub> and -COCH<sub>2</sub>); 1.85 (*m*, 1H, cyclo -CH<sub>2</sub>); 1.64 (overlapped *m*, 2H, cyclo -CH<sub>2</sub>); 1.48-1.20 (overlapped *m*, 3H, cyclo -CH<sub>2</sub>); 1.42 (*m*, 1H, cyclo -CH); 1.31 (*d*, *J* = 0.7 Hz, -CH<sub>3</sub>); 1.29 (*s*, -CH<sub>3</sub>); 1.28 (*s*, -CH<sub>3</sub>); 1.27 (*s*, -CH<sub>3</sub>); 1.27 (*m*, 1H, cyclo -CH); 1.26 (*m*, 1H, cyclo -CH); 1.23 (*d*, *J* = 0.6 Hz, -CH<sub>3</sub>); 1.22 (*s*, -CH<sub>3</sub>); 1.15 (*s*, -CH<sub>3</sub>); 1.12 (*s*, -CH<sub>3</sub>); 1.11 (*s*, -CH<sub>3</sub>); 1.10 (*s*, -CH<sub>3</sub>); 1.08 (*s*, -CH<sub>3</sub>); 1.07 (*s*, -CH<sub>3</sub>); 1.06 (*s*, -CH<sub>3</sub>); 1.05 (*s*, -CH<sub>3</sub>); 0.93 (*s*, -CH<sub>3</sub>); 0.91 (*s*, -CH<sub>3</sub>); 0.88 (*s*, -CH<sub>3</sub>); 0.87 (*s*, -CH<sub>3</sub>); 0.85 (*s*, -CH<sub>3</sub>); 0.78 (*s*, -CH<sub>3</sub>); 0.77 (*s*, -CH<sub>3</sub>).

<sup>13</sup>C NMR (400 MHz, CDCl<sub>3</sub>, rt):  $\delta$  60.06, 60.05, 59.82; 59.40; 59.35; 59.31; 59.24; 58.08; 58.05; 57.40; 56.49; 56.38; 55.51; 55.31; 54.52; 54.14; 53.88; 53.77; 53.63; 53.34; 52.89; 52.67; 52.29; 52.19; 50.48; 50.14; 44.37; 44.09; 43.67; 43.11; 43.05; 42.30; 37.39; 37.34; 37.17; 36.62; 36.53; 36.41; 36.34; 36.15; 35.08; 34.90; 26.87; 26.74; 26.44; 26.35; 25.91; 22.96; 22.87; 22.77; 22.63; 22.56; 20.47; 20.28; 19.48; 19.41; 19.25; 18.60; 18.52; 18.25; 13.15; 13.10.

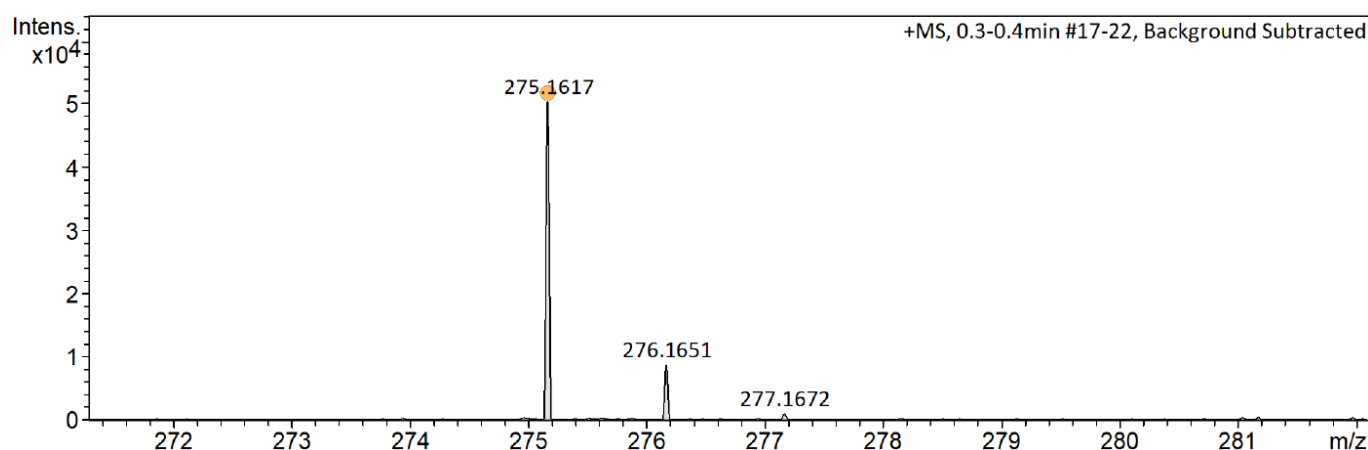

Figure S3 ESI-HRMS spectra of **BET**.

## Reaction Conditions Screening for the ROCOP of BEM/PA

**Table S2** ROCOP of **BEM** with **PA**

| Entry                 | Cat.<br>(mol%)  | [PA]/[Cat] | Solvent | T<br>(°C) | Time<br>(h) | Conv. <sup>a</sup><br>% | Polyester <sup>b</sup><br>(%) | <i>M<sub>n</sub></i> <sup>c</sup><br>(kDa) | <i>Đ</i> <sup>c</sup> |
|-----------------------|-----------------|------------|---------|-----------|-------------|-------------------------|-------------------------------|--------------------------------------------|-----------------------|
| <b>1</b>              | <b>1</b> (1)    | 100        | THF     | 60        | 36.5        | 26                      | n.d.                          | n.d.                                       | n.d.                  |
| <b>2</b>              | <b>2</b> (1)    | 100        | THF     | 60        | 36.5        | 13                      | n.d.                          | n.d.                                       | n.d.                  |
| <b>3</b>              | <b>1</b> (1)    | 100        | Tol     | 100       | 24          | 71(71)                  | >99                           | 4.72(5.11)                                 | 1.18(1.21)            |
| <b>4</b>              | <b>2</b> (1)    | 100        | Tol     | 100       | 24          | 46(44)                  | >99                           | 2.22(2.52)                                 | 1.16(1.15)            |
| <b>5<sup>d</sup></b>  | <b>1</b> (1)    | 100        | neat    | 60        | 36.5        | 81                      | >99                           | 4.85                                       | 1.14                  |
| <b>6<sup>d</sup></b>  | <b>2</b> (1)    | 100        | neat    | 60        | 36.5        | 17                      | n.d.                          | n.d.                                       | n.d.                  |
| <b>7<sup>d</sup></b>  | <b>1</b> (1)    | 100        | neat    | 80        | 24          | 92                      | >99                           | 5.41                                       | 1.20                  |
| <b>8<sup>d</sup></b>  | <b>2</b> (1)    | 100        | neat    | 80        | 24          | 24                      | >99                           | n.d.                                       | n.d.                  |
| <b>9</b>              | <b>1</b> (0.5)  | 200        | Tol     | 100       | 40.5        | 55                      | >99                           | 7.05                                       | 1.21                  |
| <b>10</b>             | <b>1</b> (0.33) | 300        | Tol     | 100       | 40.5        | 52                      | >99                           | 6.52                                       | 1.22                  |
| <b>11</b>             | <b>2</b> (0.5)  | 200        | Tol     | 100       | 40.5        | 44                      | >99                           | 3.93                                       | 1.16                  |
| <b>12</b>             | <b>2</b> (0.33) | 300        | Tol     | 100       | 40.5        | 39                      | >99                           | 4.53                                       | 1.14                  |
| <b>13<sup>d</sup></b> | <b>1</b> (0.5)  | 200        | neat    | 100       | 24          | 99                      | >99                           | 6.01                                       | 1.28                  |
| <b>14<sup>d</sup></b> | <b>1</b> (0.33) | 300        | neat    | 100       | 2           | 21                      | n.d.                          | n.d.                                       | n.d.                  |
| <b>15<sup>d</sup></b> | <b>1</b> (0.33) | 300        | neat    | 100       | 6           | 50                      | n.d.                          | n.d.                                       | n.d.                  |

Reaction conditions: Phthalic anhydride = 100 mg ( $6.75 \cdot 10^{-4}$  mol);  $\beta$ -elemene monoxides = 149 mg ( $6.75 \cdot 10^{-4}$  mol); solvent = 200  $\mu$ L; PPNCI/Catalyst = 1/1. a) Determined by  $^1\text{H}$  NMR on the basis of aromatic proton signals of phthalic anhydride and polyester. b) Determined by  $^1\text{H}$  NMR of isolated product. c) Determined by GPC in THF calibrated with polystyrene standards. d)  $\beta$ -elemene monoxides = 298 mg ( $1.35 \cdot 10^{-3}$  mol).

### General Procedure for the ROCOP of BEM/PA in Toluene (entry 1, Table 1)

In a glove-box, PPNCI (3.9 mg, 6.75  $\mu$ mol), complex **1** (3.7 mg, 6.75  $\mu$ mol), **PA** (100 mg, 0.68 mmol), **BEM** (149 mg, 0.68 mmol), and toluene (200  $\mu$ L) were added in this order into a 4 mL glass vial equipped with a magnetic stirring bar. The vial was closed with a Teflon lined cap and sealed with electric insulator tape. Out of the glove-box, the vial was placed in an aluminum heating mantel preheated to 100  $^{\circ}$ C, and the mixture kept stirring for 17 h. To stop the reaction, the vial was cooled down to room temperature in cold water, opened to air and the mixture dissolved into a minimum amount of dichloromethane. An aliquot was collected to determine the conversion by  $^1\text{H}$  NMR analysis. The reaction mixture was poured into acidified methanol under stirring and the polymer product was collected by filtration. The polymer was purified by dissolution into dichloromethane and precipitated from methanol. Conversion = 75%. Yield = 67%.  $M_n$  = 6.96,  $D$  = 1.19.

$^1\text{H}$  NMR (400 MHz,  $\text{CDCl}_3$ , rt):  $\delta$  7.68 (bs, 1H, Ar-CH); 7.60 (bs, 1H, Ar-CH); 7.47-7.39 (overlapped m, 2H, Ar-CH); 5.77 (overlapped m, 1H, -CH=CH<sub>2</sub>); 4.89 (s, 1H, -CH=CH<sub>2</sub>); 4.88-4.62 (overlapped m, 2H, polyester -[O-CH<sub>2</sub>-CR<sub>2</sub>]-); 4.86 (s, 1H, -CH=CH<sub>2</sub>); 4.80 (s, 1H, -C=CH<sub>2</sub>); 4.56 (s, 1H, -C=CH<sub>2</sub>); 2.33 (broad s, 1H, cyclo-CH), 1.99 (d, 1H, cyclo-CH) 1.68 (s, 3H, -CH<sub>3</sub>); 1.66 (s, 3H, -CH<sub>3</sub>); 1.65-1.42 (overlapped, 6H, cyclo -CH<sub>2</sub>) 0.97 (s, 3H, -CH<sub>3</sub>)

$^{13}\text{C}$  NMR (400 MHz,  $\text{CDCl}_3$ , rt):  $\delta$  167.02; 166.83; 166.60; 166.40; 150.16; 149.91; 147.64; 147.46; 134.12; 134.00; 133.76; 133.69; 132.01; 131.33; 131.14; 131.06; 130.68; 129.54; 129.25; 128.97; 112.41; 112.35; 110.25; 110.09; 87.00; 86.65; 86.61; 86.52; 86.40; 86.27; 73.65; 73.59; 73.50; 71.23; 67.02; 66.82; 52.75; 52.44; 52.38; 50.99; 45.80; 43.60; 39.82; 39.68; 39.62; 31.04; 28.60; 28.34; 27.91; 27.57; 25.12; 24.95; 24.87; 22.82; 22.45; 22.13; 21.82; 21.62; 21.53; 21.32; 21.18; 19.03; 18.79; 18.72; 16.72; 16.67.

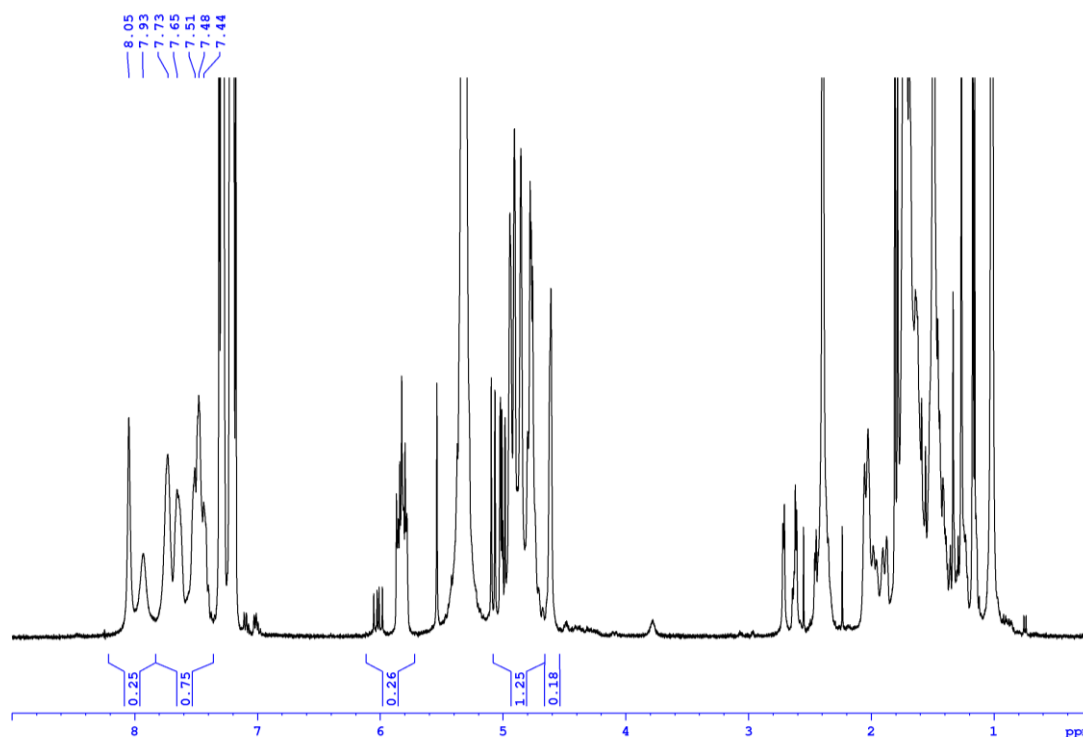

**Figure S4**  $^1\text{H}$  NMR spectra of an aliquot of the reaction mixture for the formation of poly(**BEM**-*alt*-**PA**) to determine the conversion (entry 1, Table 1) ( $\text{CDCl}_3$ , 400 MHz).

### General Procedure for the ROCOP of BEM/PA without Solvent (entry 5, Table 1)

In a glove-box, PPNCI (1.3 mg, 2.25  $\mu$ mol), complex **1** (1.2 mg, 2.25  $\mu$ mol), **PA** (100 mg, 0.68 mmol) and **BEM** (298 mg, 1.35 mmol) were added in this order into a 4 mL glass vial equipped with a magnetic stirring bar. The vial was closed with a Teflon lined cap and sealed with electric insulator tape. Out of the glove-box, the vial was placed into an aluminum heating mantel, preheated to the desired temperature, and the mixture kept stirring for the desired reaction time. To stop the reaction, the vial was cooled down to room temperature in cold water, opened to air and the mixture dissolved into a minimum amount of dichloromethane. An aliquot was collected to determine the conversion by  $^1\text{H}$  NMR analysis. The reaction mixture was poured into acidified methanol under stirring and the polymer was collected by filtration. The polymer was purified by dissolution into dichloromethane and precipitated from methanol. Conversion = 98%. Yield = 95%.  $M_n$  = 6.39,  $D$  = 1.25.

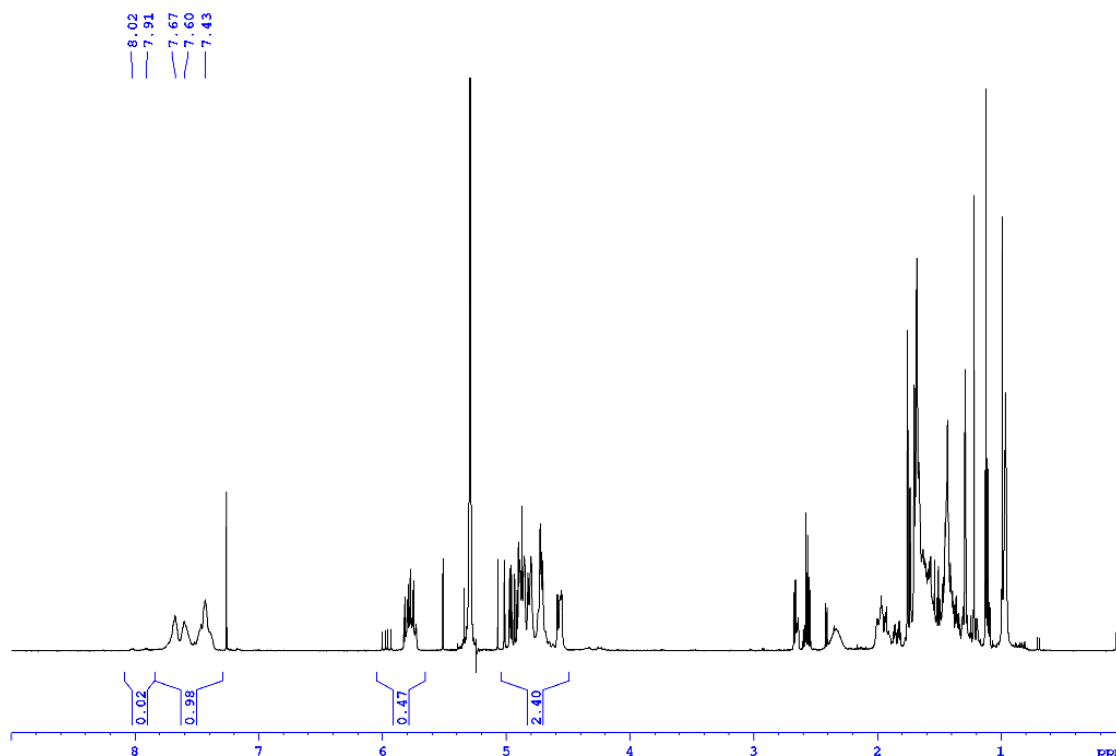

**Figure S5**  $^1\text{H}$  NMR spectra of an aliquot of the reaction mixture for the formation of poly(**BEM**-*alt*-**PA**) to determine the conversion (entry 5, Table 1) ( $\text{CDCl}_3$ , 400 MHz).

### Gram-scale ROCOP of BEM/PA in Toluene (entry 6, Table 1)

In a glove-box, PPNCI (38.8 mg,  $6.75 \cdot 10^{-5}$  mol), complex **1** (36.8 mg,  $6.75 \cdot 10^{-5}$  mol), **PA** (1.00 g, 6.75 mmol), **BEM** (1.49 g, 6.75 mmol), and toluene (2.0 mL) were added in this order into a 10 mL Schlenk tube equipped with a magnetic stirring bar. Out of the glove-box, the tube was placed in an oil bath, preheated to 100  $^\circ\text{C}$ , and kept stirring for 24 h. To stop the reaction, the tube was cooled down to room temperature in cold water, opened to air and the mixture dissolved into the minimum amount of dichloromethane. An aliquot was collected to determine the conversion by  $^1\text{H}$  NMR analysis. The reaction mixture was poured into acidified methanol under stirring and the polymer was collected by filtration. The polymer was purified by dissolution into dichloromethane and precipitated from methanol. Conversion = 55%. Yield = 52%.  $M_n$  = 6.88,  $D$  = 1.21.

### Gram-scale ROCOP of BEM/PA without solvent (entry 7, Table 1)

In a glove-box, PPNCI (12.3 mg,  $2.14 \cdot 10^{-5}$  mol), complex **1** (11.6 mg,  $2.14 \cdot 10^{-5}$  mol), **PA** (0.95 g, 6.41 mmol), and **BEM** (2.83 g, 12.8 mmol) were added in this order into a 10 mL Schlenk tube equipped with a magnetic stirring bar. Out of the glove-box, the tube was placed in an oil bath, preheated to 100  $^\circ\text{C}$  and kept stirring for 24 h. To stop the reaction, the tube was cooled down to room temperature in cold water, opened to air and the mixture dissolved into a minimum amount of dichloromethane. An aliquot was collected for to determine the conversion by  $^1\text{H}$  NMR analysis. The reaction mixture was poured into acidified methanol under stirring and the polymer was collected by filtration. The polymer was purified by dissolution in dichloromethane and precipitated from methanol. Conversion = > 99%. Yield = 94%.  $M_n$  = 4.36,  $D$  = 1.21.

### General Procedure for the ROCOP of BED/PA in Toluene (entry 8, Table 1)

In a glove-box, PPNCl (3.9 mg, 6.75  $\mu$ mol), complex **1** (3.7 mg, 6.75  $\mu$ mol), **PA** (100 mg, 0.68 mmol), **BED** (160 mg, 0.68 mmol), and toluene (200  $\mu$ L) were added in this order into a 4 mL glass vial equipped with a magnetic stirring bar. The vial was closed with a Teflon lined cap and sealed with electric insulator tape. Out of the glove-box, the vial was placed in an aluminum heating mantel, preheated to 60  $^{\circ}$ C, and kept stirring for 48 h. To stop the reaction, the vial was cooled down to room temperature in cold water, opened to air and the mixture dissolved into a minimum amount of dichloromethane. An aliquot was collected to determine the conversion by  $^1\text{H}$  NMR analysis. The reaction mixture was poured into acidified methanol under stirring and the polymer was collected by filtration. Conversion = 57%. Yield = 52%.  $M_n$  = 6.8,  $D$  = 1.77.

$^1\text{H}$  NMR (400 MHz,  $\text{CDCl}_3$ , rt):  $\delta$  7.70 (*bs*, 1H, Ar-CH); 7.45 (overlapped *m*, 3H, Ar-CH); 6.01 and 5.71 (*bs*, 1H, -CH=CH<sub>2</sub>); 5.14-4.76 (overlapped *m*, 2H, -CH=CH<sub>2</sub> and 2H, polyester -[O-CH<sub>2</sub>-CR<sub>2</sub>]-); 3.96 (broad *s*, branch polyester -[O-CH<sub>2</sub>-CR<sub>2</sub>]-); 2.30 (broad *s*, 2H, -COCH<sub>2</sub>), 2.01 (*d*, 1H, cyclo-CH); 1.67 (overlapped *m*, 1H, cyclo -CH<sub>2</sub>); 1.66 (overlapped *m*, 1H, cyclo -CH<sub>2</sub>); 1.64 (overlapped *s*, 3H, -CH<sub>3</sub>); 1.48-1.44 (overlapped *m*, 2H, cyclo -CH<sub>2</sub>); 1.18 (overlapped *s*, 3H, -CH<sub>3</sub>); 1.03 (overlapped *m*, 1H, cyclo-CH); 0.97 (overlapped *s*, 3H, -CH<sub>3</sub>).

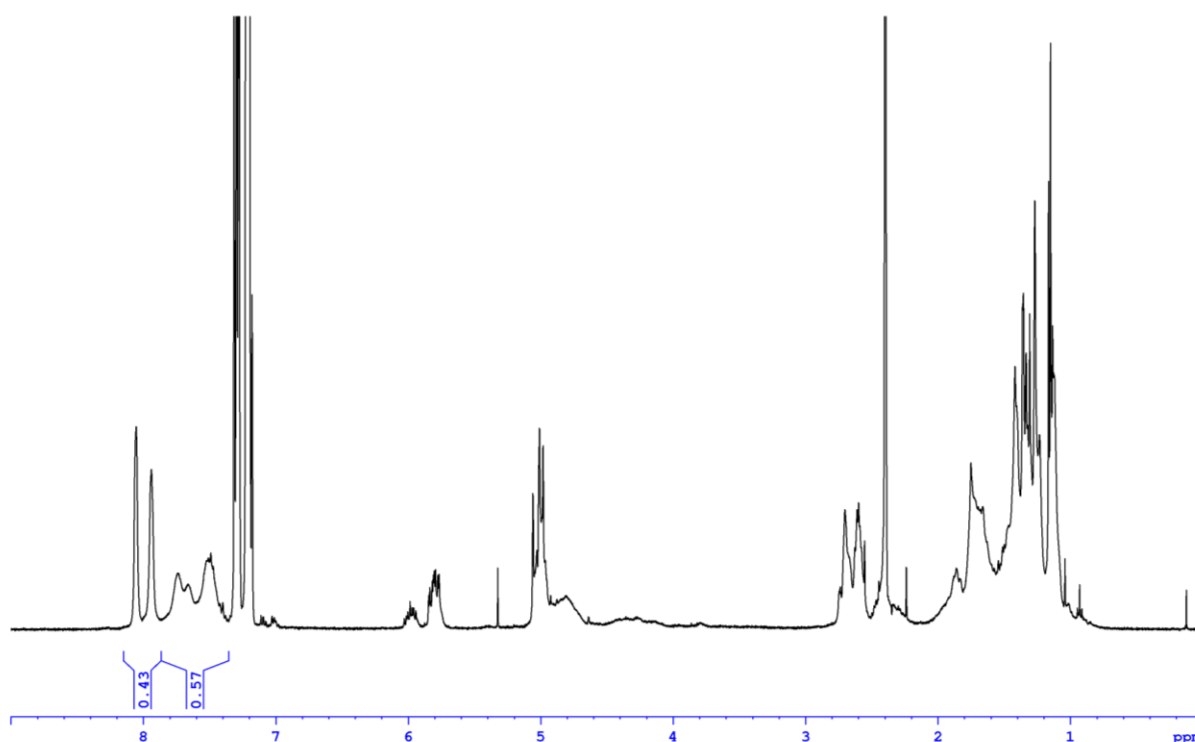

**Figure S6**  $^1\text{H}$  NMR spectra of an aliquot of the reaction mixture for the formation of poly(**BED-*alt*-PA**) to determine the conversion (entry 8, Table 1) ( $\text{CDCl}_3$ , 400 MHz).

### General Procedure for the ROCOP of BED/PA without Solvent (entry 11, Table 1)

In a glove-box, PPNCI (3.9 mg, 6.75  $\mu$ mol), complex **1** (3.7 mg, 6.75  $\mu$ mol), **PA** (100 mg, 0.68 mmol), and **BED** (319 mg, 1.35 mmol) were added in this order into a 4 mL glass vial equipped with a magnetic stirring bar. The vial was closed with a Teflon lined cap and sealed with electric insulator tape. Out of the glove-box, the vial was placed in an aluminum heating mantel, preheated to 80  $^{\circ}$ C, and kept stirring for 24 h. To stop the reaction, the vial was cooled down to room temperature in cold water, opened to air and the mixture dissolved into a minimum amount of dichloromethane. An aliquot was collected to determine the conversion by  $^1\text{H}$  NMR analysis. The reaction mixture was poured into acidified methanol under stirring and the polymer was collected by filtration. Conversion = 91%. Yield = 89%.  $M_n$  = 4.1,  $D$  = 2.48.

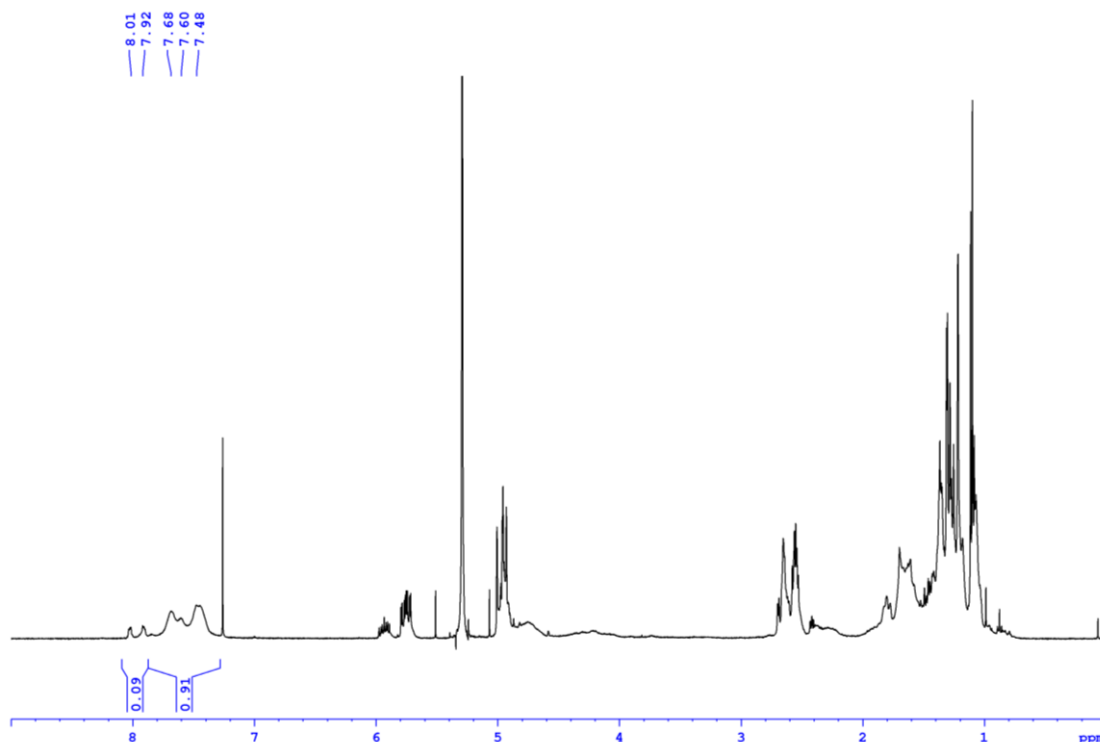

**Figure S7**  $^1\text{H}$  NMR spectra of an aliquot of the reaction mixture for the formation of poly(**BED**-*alt*-**PA**) to determine the conversion (entry 11, Table 1) ( $\text{CDCl}_3$ , 400 MHz).

### Epoxidation of Poly(BEM-*alt*-PA) to Poly(BED-*alt*-PA)

In a 50 mL flask, poly(BEM-*alt*-PA) (400 mg, 1.09 mmol repeating unit,  $M_n = 4.36$  kDa,  $\bar{D} = 1.21$ ) was dissolved into dichloromethane (22 mL, [repeating unit] = 0.05 M) and positioned in an ice bath. *m*CPBA (77 % w/w, 292 mg, 1.30 mmol, 1.2 eq) was added portion-wise during 5 minutes. The flask was left in the ice bath and warmed up to room temperature under stirring. After 15 h, the solution was washed 3 times with saturated NaHCO<sub>3</sub> (aq) and 2 times with water, then the solution was dried using Na<sub>2</sub>SO<sub>4</sub>. The solid was dissolved into a minimum amount of dichloromethane and poured into methanol under stirring. The polymer was collected by filtration and dried in vacuum. Isolated yield = 0.40 g (96%);  $M_n = 4.10$  kDa,  $\bar{D} = 1.22$ . Functionalization degree = 94%.

<sup>1</sup>H NMR (400 MHz, CDCl<sub>3</sub>, rt):  $\delta$  7.69 (bs, 1H, Ar-CH);  $\delta$  7.61 (bs, 1H, Ar-CH); 7.44 (overlapped *m*, 2H, Ar-CH); 5.92 and 5.73 (*dd*,  $J = 10.4$  Hz,  $J = 16.9$  Hz, and overlapped *m*, 1H, -CH=CH<sub>2</sub>); 4.98-4.88 (overlapped *m*, 2H, -CH=CH<sub>2</sub>); 4.76 (overlapped bs, 2H, polyester -[O-CH<sub>2</sub>-CR<sub>2</sub>]-); 2.57 (*m*, 2H, -COCH<sub>2</sub>); 2.29 (broad *s*, 1H, cyclo-CH); 1.90 (overlapped *m*, 1H, cyclo-CH<sub>2</sub>); 1.70 (overlapped *s*, 3H, -CH<sub>3</sub>); 1.65-1.37 (overlapped *m*, 5H, cyclo -CH<sub>2</sub>); 1.36 (overlapped *m*, 1H, cyclo -CH); 1.25-0.94 (overlapped *s*, 6H, -CH<sub>3</sub>).

<sup>13</sup>C NMR (400 MHz, CDCl<sub>3</sub>, rt):  $\delta$  167.02; 166.60; 150.06; 149.97; 149.25; 149.00; 147.49; 133.99; 131.46; 130.71; 128.93; 112.41; 110.93; 110.26; 110.00; 86.47; 86.35; 73.50; 71.26; 66.96; 66.60; 59.84; 58.65; 58.13; 58.09; 57.97; 53.55; 53.27; 53.02; 52.43; 51.36; 43.62; 43.33; 41.41; 40.82; 39.87; 39.65; 39.28; 25.12; 24.86; 24.56; 24.29; 22.62; 22.18; 21.86; 20.11; 19.04; 18.86; 18.68; 17.52; 17.33; 16.69.

### Epoxidation of Poly(BEM-*alt*-PA) to Poly(BET-*alt*-PA)

In a 50 mL flask, poly(BEM-*alt*-PA) (400 mg, 1.09 mmol repeating unit,  $M_n = 4.36$  kDa,  $\bar{D} = 1.21$ ) was dissolved into dichloromethane (22 mL, [repeating unit] = 0.05 M) and positioned in an ice bath. *m*CPBA (77 % w/w, 608 mg, 2.71 mmol, 2.5 eq) was added portion-wise during 5 minutes. The flask was left in the ice bath and warmed up to room temperature under stirring. After 26 h, the solution was washed 3 times with saturated NaHCO<sub>3</sub> (aq) and 2 times with water following drying on Na<sub>2</sub>SO<sub>4</sub>. The solid was dissolved into a minimum amount of dichloromethane and poured into methanol under stirring. The polymer was collected by filtration and dried in vacuum. Isolated yield = 0.41 g (94%);  $M_n = 4.02$  kDa,  $\bar{D} = 1.26$ . Functionalization degree = 90%.

<sup>1</sup>H NMR (400 MHz, CDCl<sub>3</sub>, rt):  $\delta$  7.69 (bs, 1H, Ar-CH);  $\delta$  7.61 (bs, 1H, Ar-CH); 7.45 (overlapped *m*, 2H, Ar-CH); 4.76 (bs, 2H, polyester -[O-CH<sub>2</sub>-CR<sub>2</sub>]-); 3.58 (overlapped *m*, 1H, -CHOCH<sub>2</sub>); 2.90-2.43 (overlapped *m*, 4H, -CHOCH<sub>2</sub> and -COCH<sub>2</sub>); 2.23 (bs, 1H, cyclo -CH); 1.86 (overlapped *m*, 1H, cyclo -CH); 1.85 (overlapped *m*, 1H, cyclo -CH<sub>2</sub>); 1.69 (overlapped *s*, 3H, -CH<sub>3</sub>); 1.69-1.33 (overlapped *m*, 5H, cyclo -CH<sub>2</sub>); 1.25-0.75 (overlapped *s*, 6H, -CH<sub>3</sub>).

<sup>13</sup>C NMR :  $\delta$  166.61; 133.63; 133.30; 132.01; 131.56; 130.79; 128.97; 128.10; 86.29; 66.95; 59.95; 59.76; 58.03; 57.39; 56.27; 55.26; 53.82; 53.55; 50.38; 44.38; 43.17; 42.33; 39.27; 37.46; 37.04; 36.58; 36.26; 36.07; 35.29; 24.74; 24.43; 22.13; 21.95; 21.63; 21.27; 20.32; 20.11; 19.58; 18.92; 18.63; 17.52; 15.68; 15.18; 13.21.

## NMR Characterization of BE

NMR characterization of  $\beta$ -elemene is reported to facilitate comparison with the  $\beta$ -elemene oxide products.

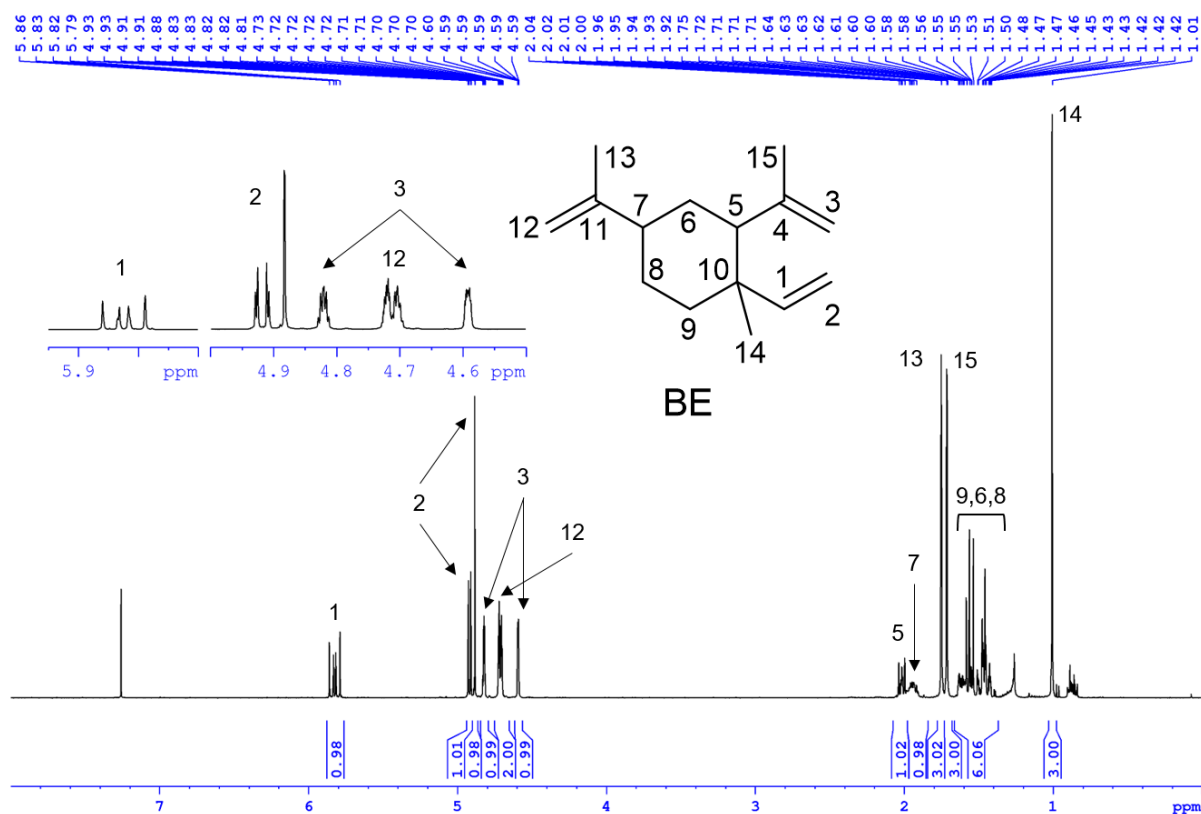

Figure S8 <sup>1</sup>H NMR of BE (400 MHz, rt, CDCl<sub>3</sub>).

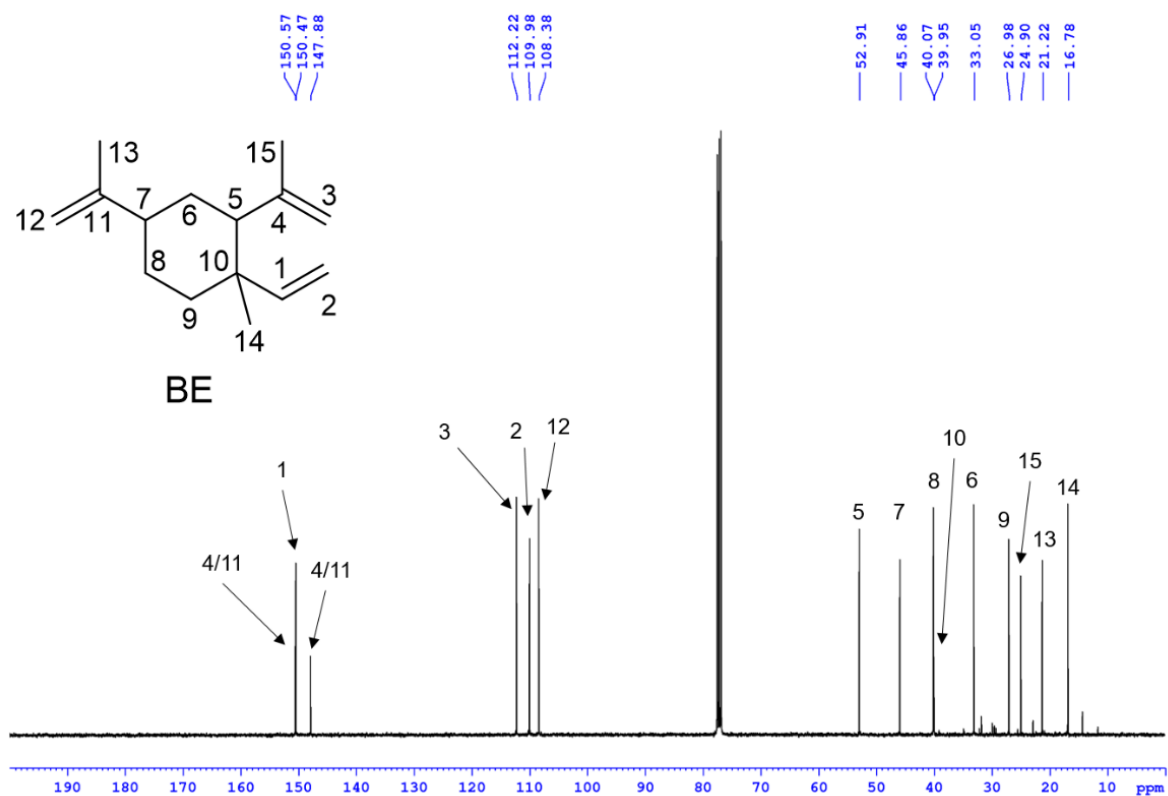

Figure S9 <sup>13</sup>C NMR of BE (400 MHz, rt, CDCl<sub>3</sub>).



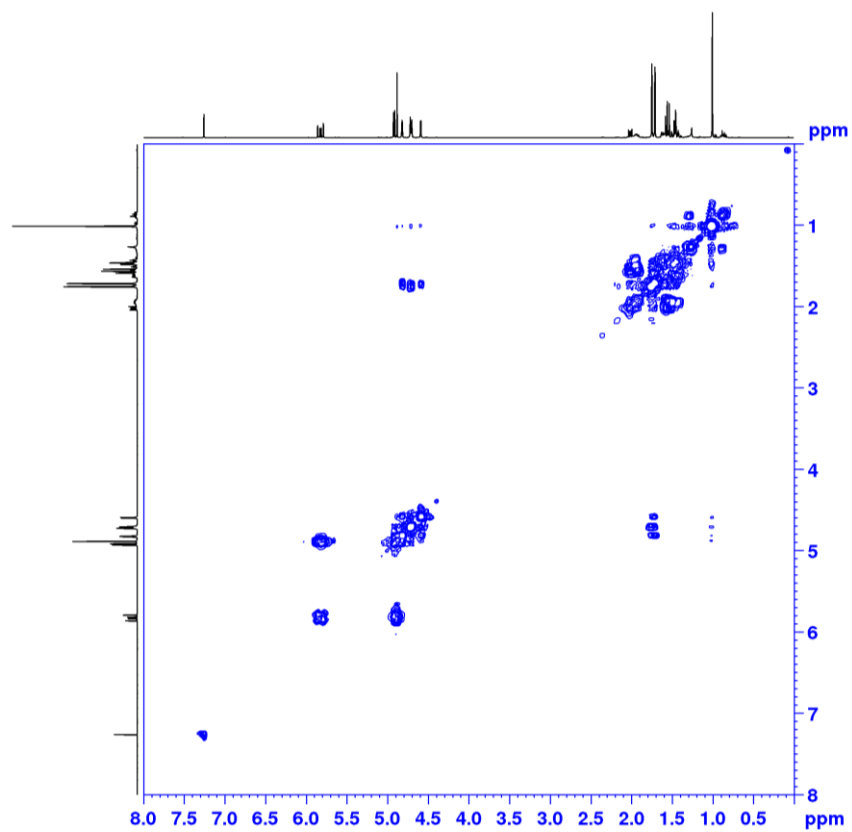

**Figure S10**  $^1\text{H}$ - $^1\text{H}$  COSY NMR of **BE** (400 MHz, rt,  $\text{CDCl}_3$ ).

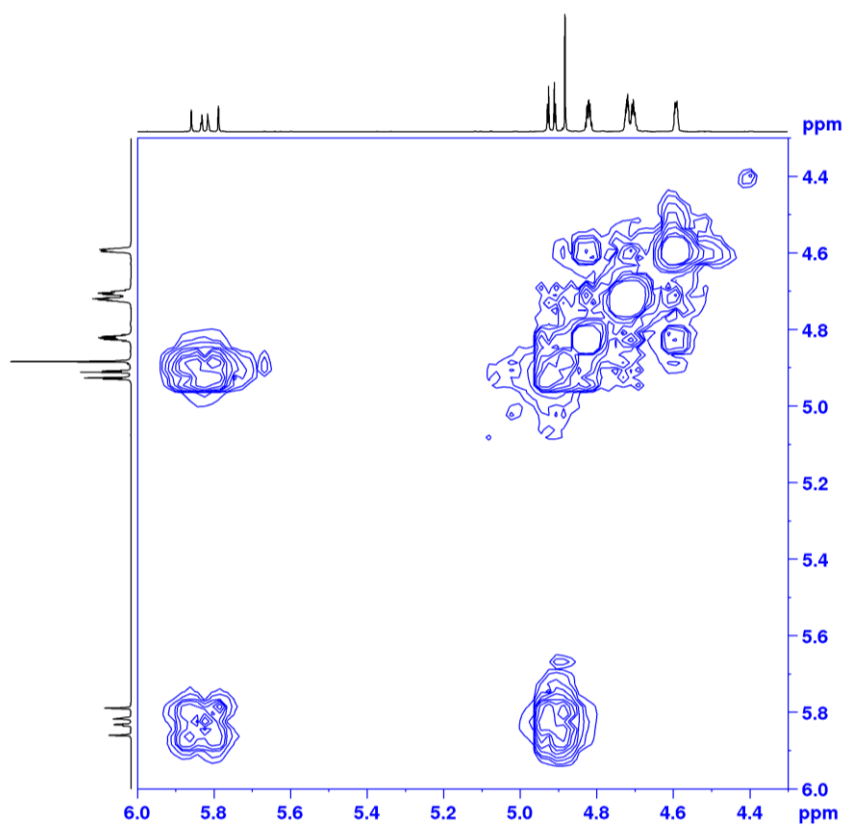

**Figure S11**  $^1\text{H}$ - $^1\text{H}$  COSY NMR of **BE** from 6.0 to 4.3 ppm (400 MHz, rt,  $\text{CDCl}_3$ ).

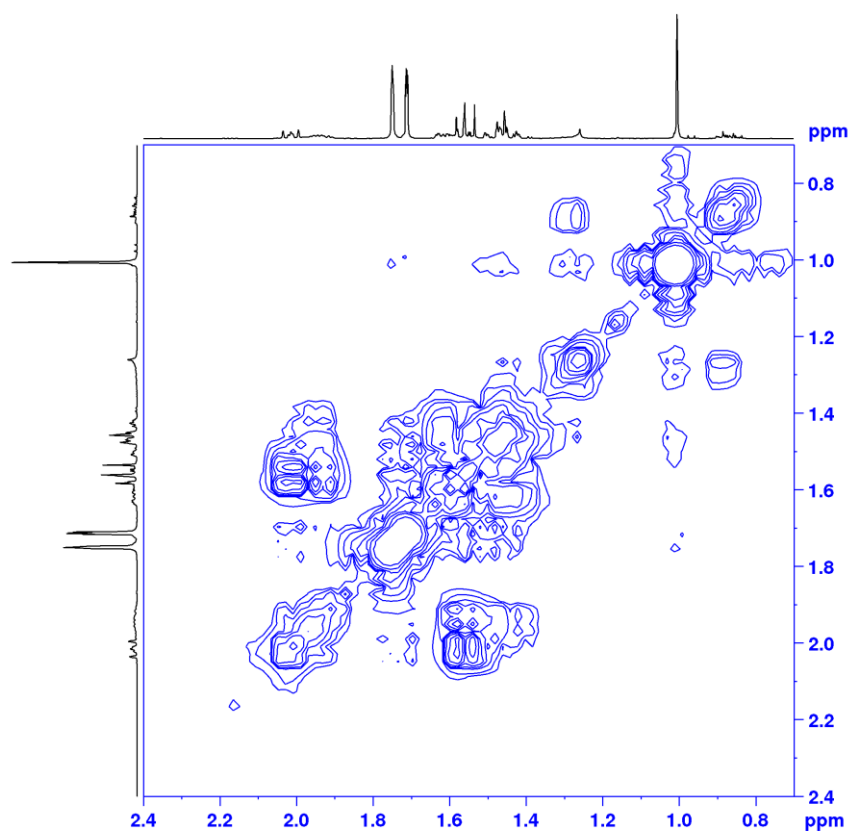

**Figure S12**  $^1\text{H}$ - $^1\text{H}$  COSY NMR of **BE** from 2.4 to 0.7 ppm (400 MHz, rt,  $\text{CDCl}_3$ ).

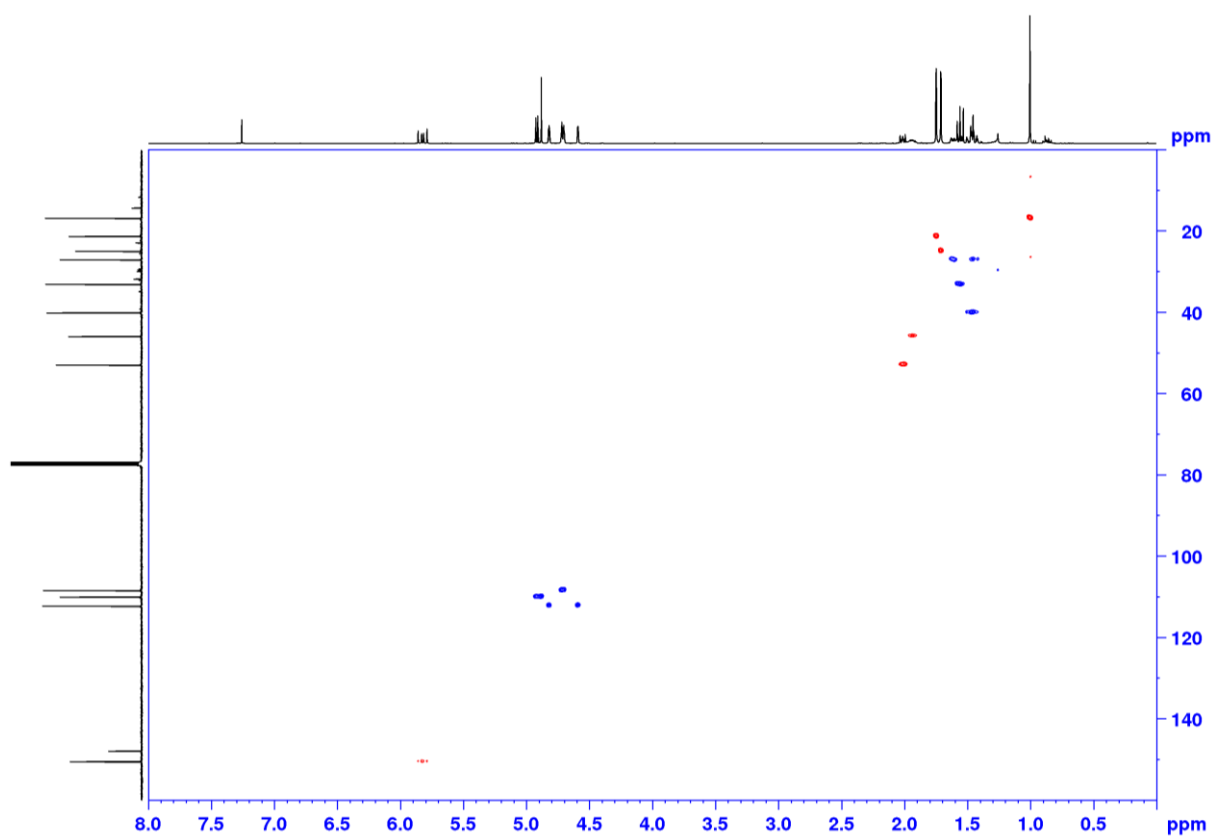

**Figure S13**  $^1\text{H}$ - $^{13}\text{C}$  HSQC NMR of **BE** (400 MHz, rt,  $\text{CDCl}_3$ ).

## NMR Characterization of BEM

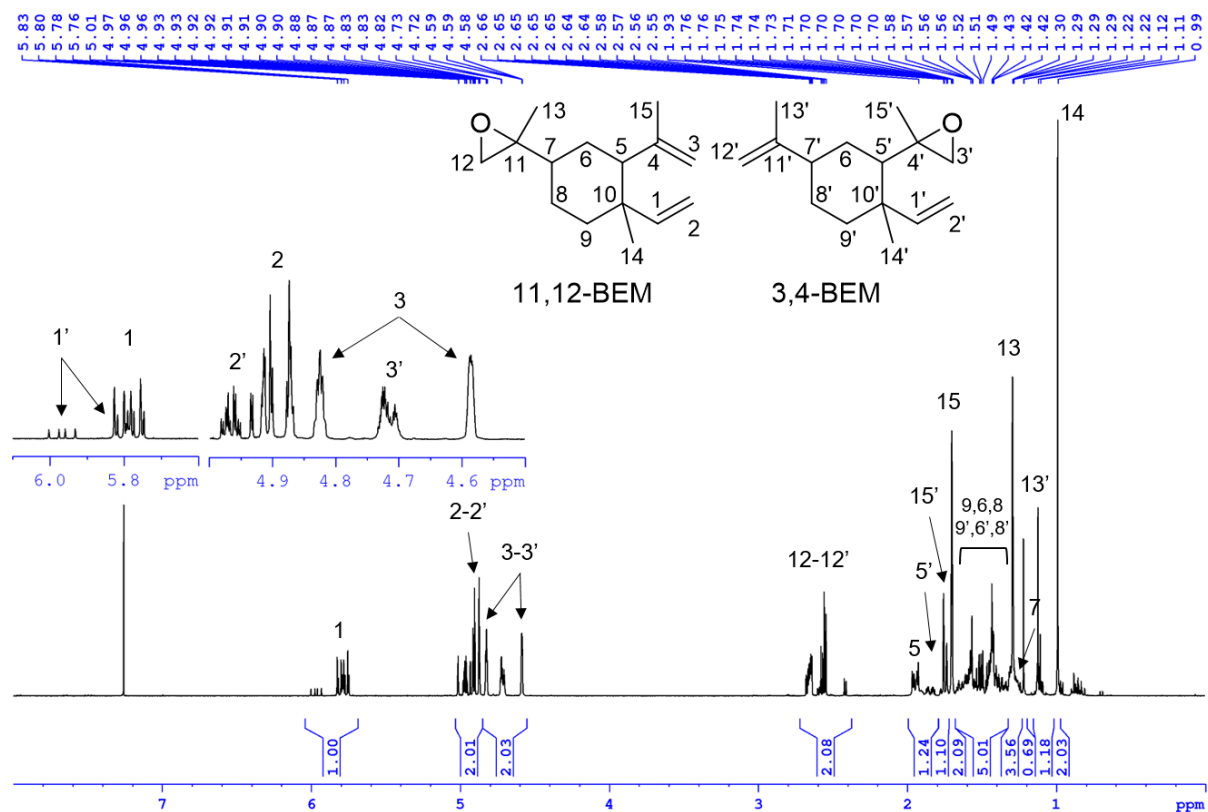

Figure S14  $^1\text{H}$  NMR of **BEM** (400 MHz, rt,  $\text{CDCl}_3$ ).

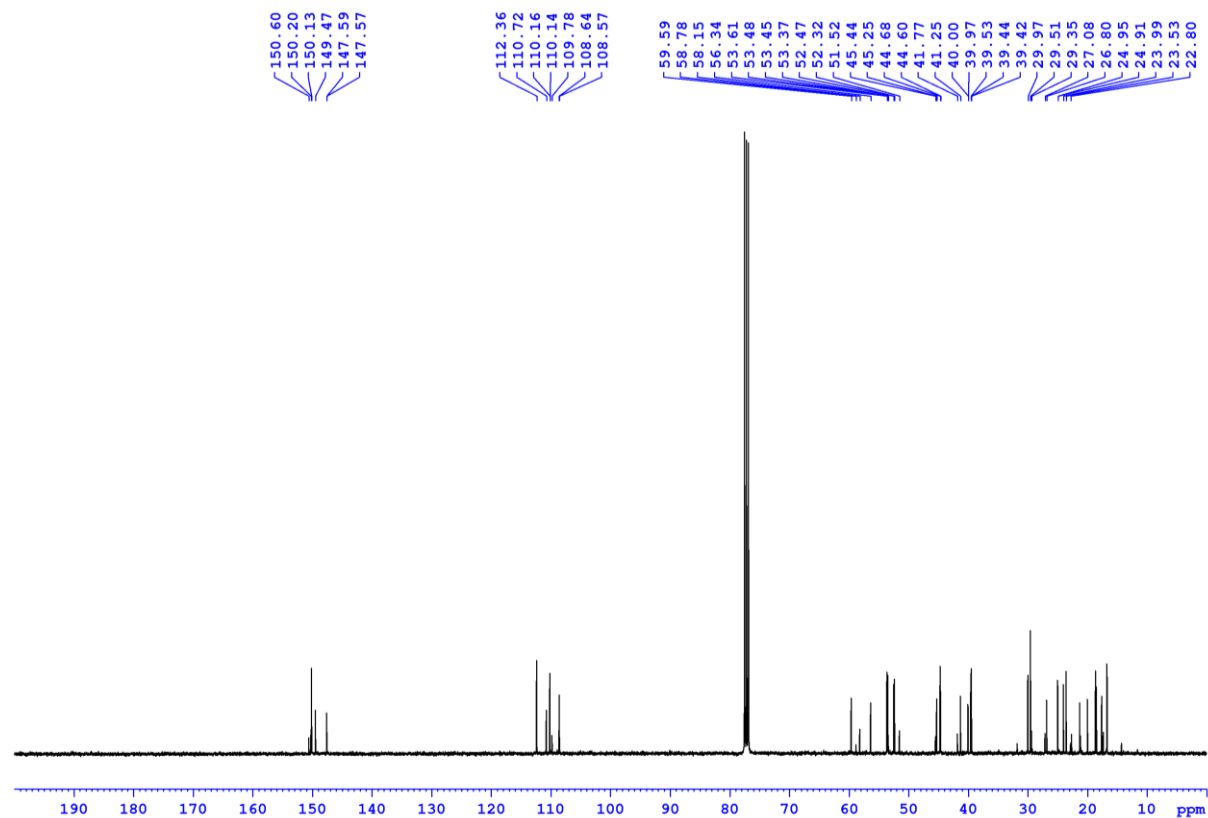

Figure S15  $^{13}\text{C}$  NMR of **BEM** (400 MHz, rt,  $\text{CDCl}_3$ ).

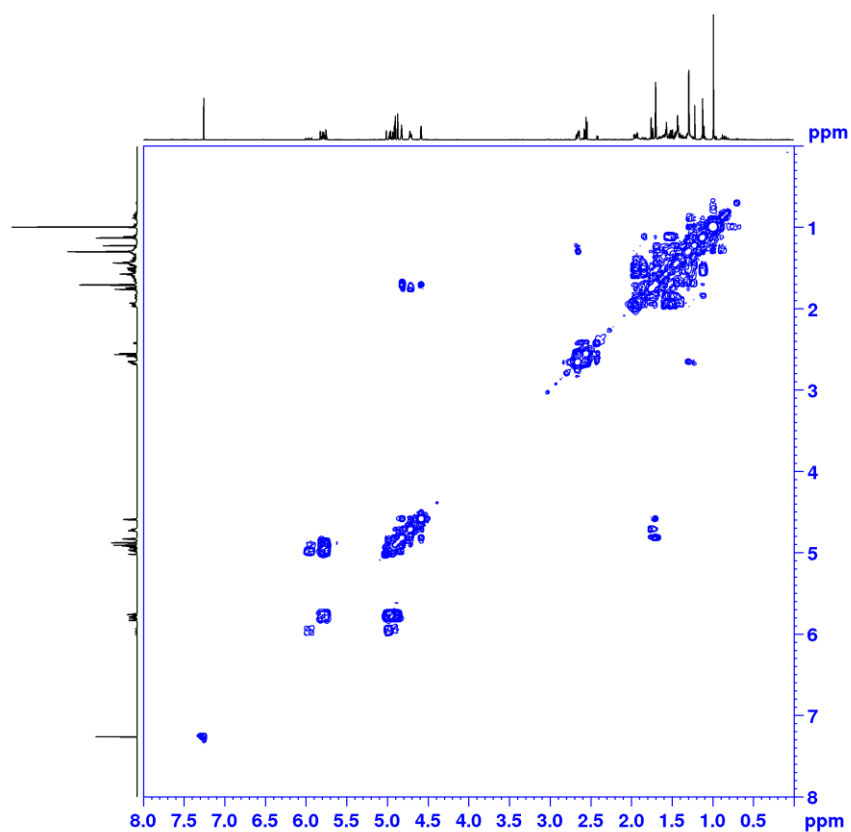

**Figure S16**  $^1\text{H}$ - $^1\text{H}$  COSY NMR of **BEM** (400 MHz, rt,  $\text{CDCl}_3$ ).

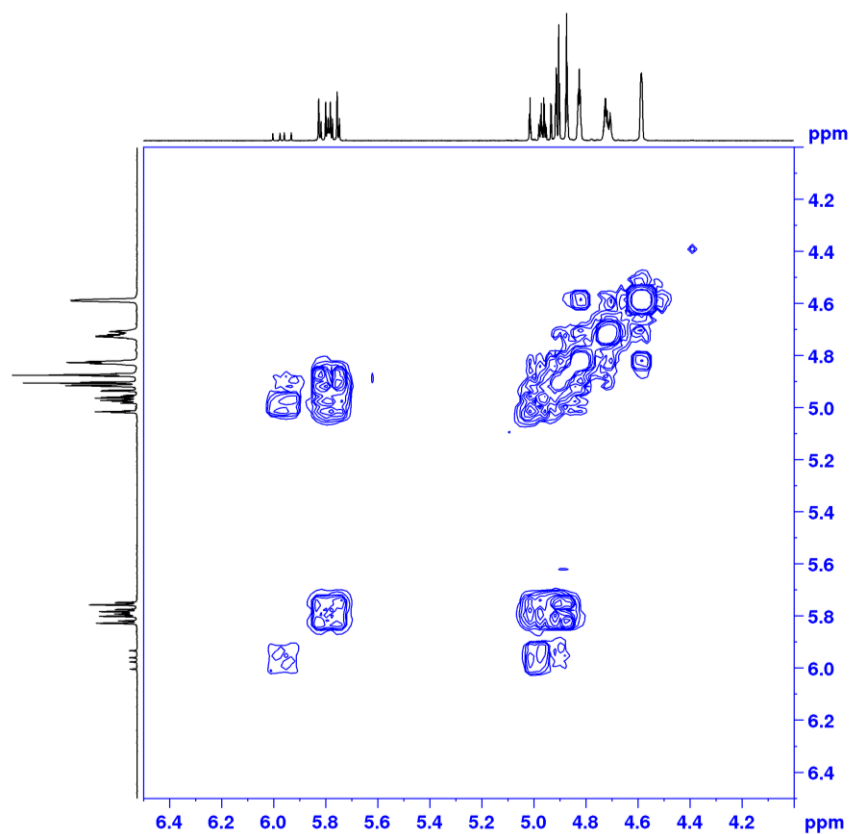

**Figure S17**  $^1\text{H}$ - $^1\text{H}$  COSY NMR of **BEM** from 6.5 to 4.2 ppm (400 MHz, rt,  $\text{CDCl}_3$ ).

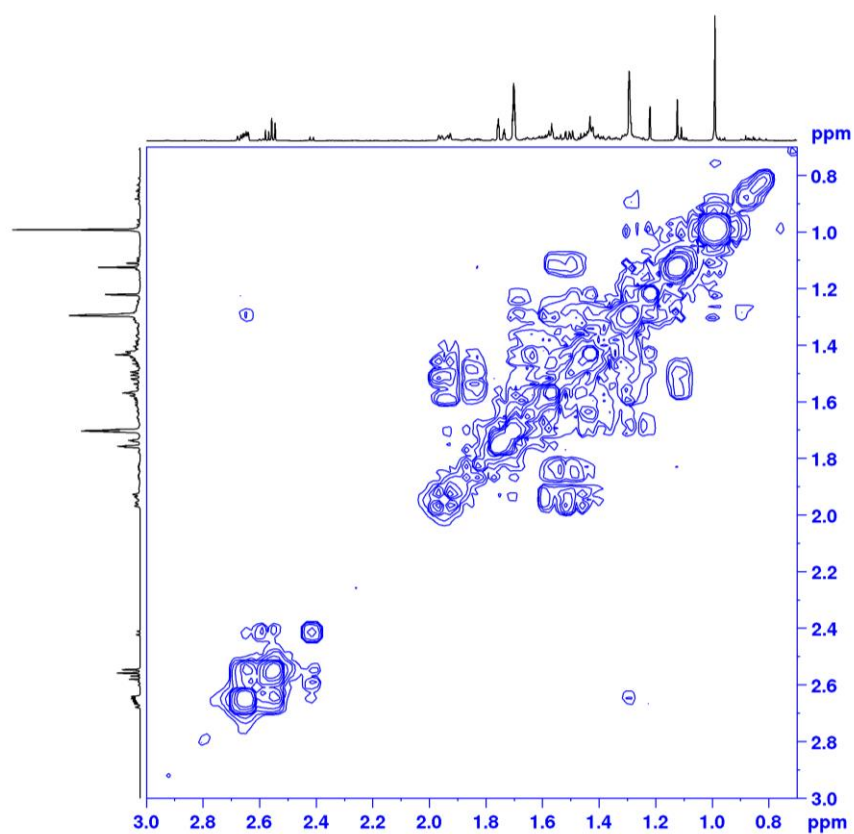

**Figure S18**  $^1\text{H}$ - $^1\text{H}$  COSY NMR of **BEM** from 3.0 to 0.7 ppm (400 MHz, rt,  $\text{CDCl}_3$ ).

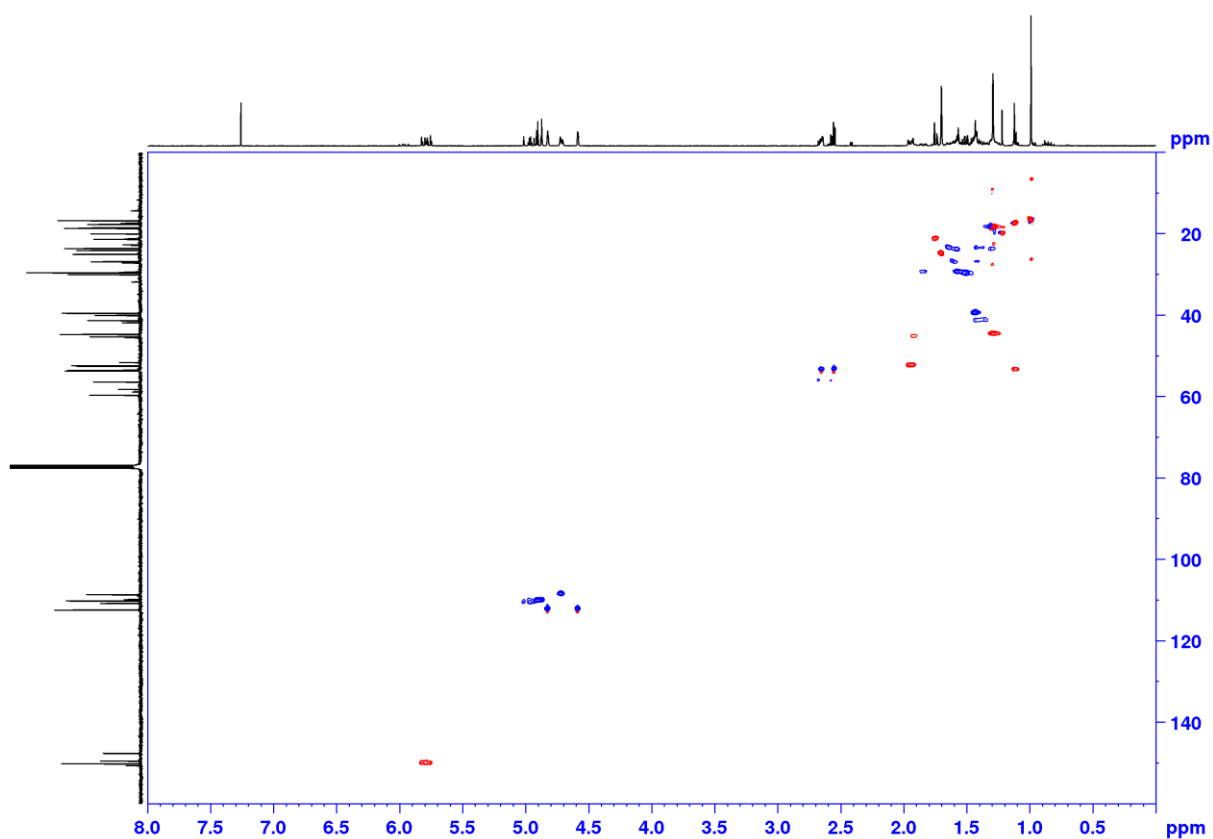

**Figure S19**  $^1\text{H}$ - $^{13}\text{C}$  HSQC NMR of **BEM** (400 MHz, rt,  $\text{CDCl}_3$ ).

Chemical structure of 11,12-BEM (11,12-bis(2-methyl-2-propenyl)-1,2-epoxycyclohexane) is shown. The structure is labeled with numbers 1 through 15, corresponding to the proton assignments in the NMR spectrum.

The <sup>1</sup>H NMR spectrum (CDCl<sub>3</sub>) shows the following peaks and integrations:

- Peak 1: ~5.8 ppm, integration 1.00
- Peak 2: ~4.9 ppm, integration 1.00
- Peak 3: ~4.8 ppm, integration 0.90
- Peak 12: ~2.5 ppm, integration 1.01
- Peak 5: ~1.9 ppm, integration 1.00
- Peak 15: ~1.6 ppm, integration 2.96
- Peak 9,6,8: ~1.4 ppm, integration 6.00
- Peak 7: ~1.2 ppm, integration 4.07
- Peak 13: ~1.0 ppm, integration 2.98

The inset shows the region from 4.6 to 5.8 ppm, with peaks 1, 2, 3, and 14 labeled. The x-axis is labeled in ppm from 0.99 to 5.83.

<sup>13</sup>C NMR spectrum of 1,2,3,4,5-pentachlorobenzene. The spectrum shows peaks at 150.13, 147.59, 147.57, 112.36, 110.16, 110.14, 77.0 (CDCl<sub>3</sub>), 59.59, 53.61, 53.48, 52.47, 52.32, 44.68, 44.60, 40.00, 39.97, 39.53, 39.44, 29.97, 29.51, 29.51, 24.95, 24.90, 23.99, 23.53, 18.61, 18.45, 16.71, and 16.68 ppm.

S22

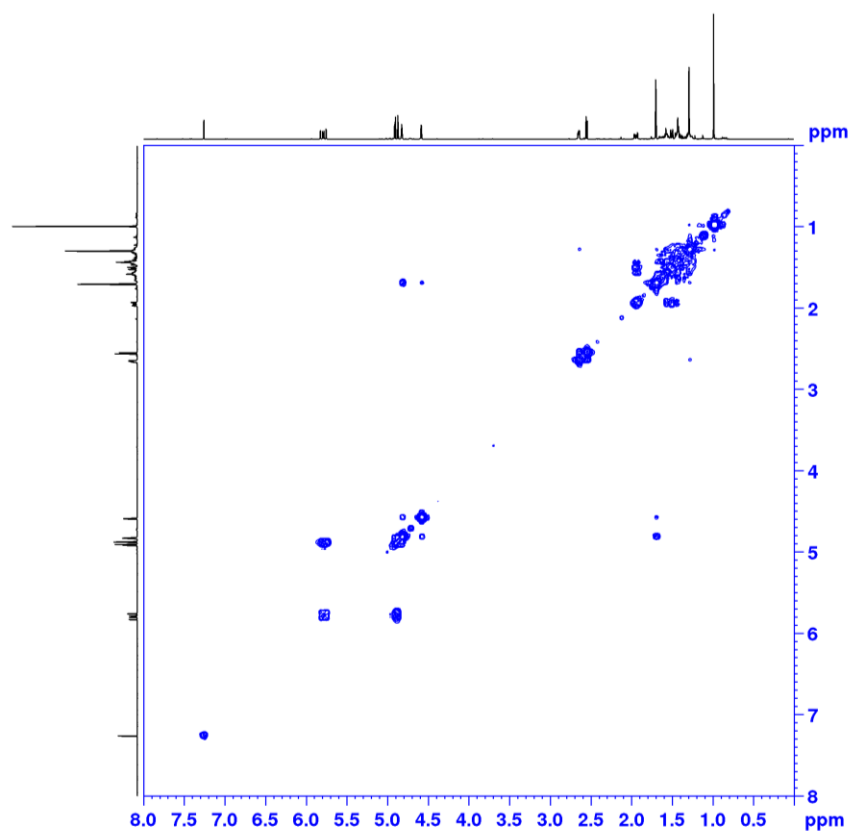

**Figure S22**  $^1\text{H}$ - $^1\text{H}$  COSY NMR of 11,12-**BEM** (400 MHz, rt,  $\text{CDCl}_3$ ).

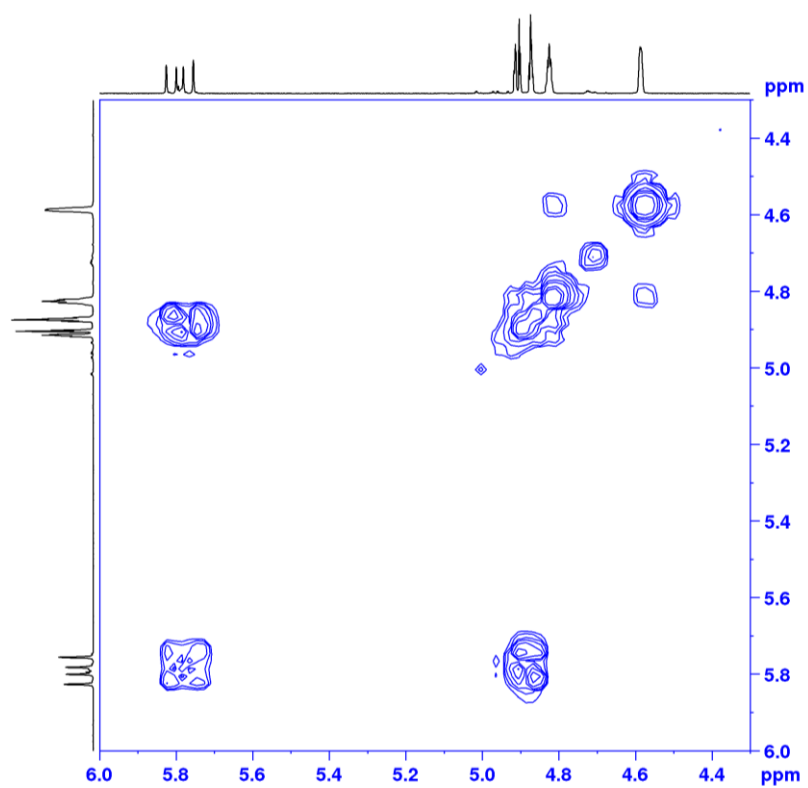

**Figure S23**  $^1\text{H}$ - $^1\text{H}$  COSY NMR of 11,12-**BEM** from 6.0 to 4.3 ppm (400 MHz, rt,  $\text{CDCl}_3$ ).

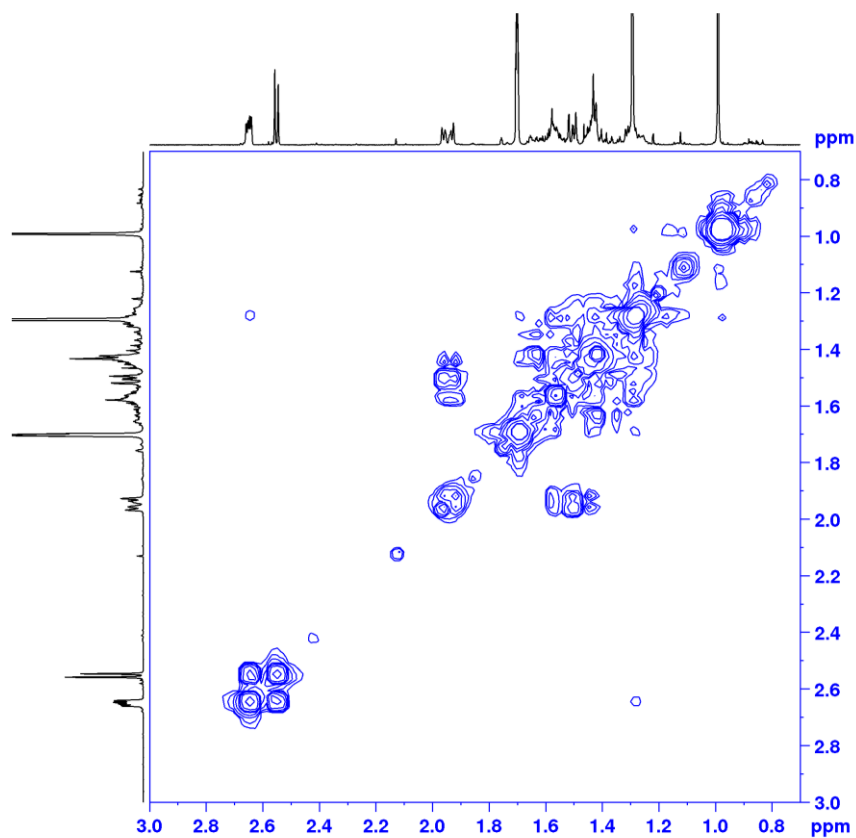

**Figure S24**  $^1\text{H}$ - $^1\text{H}$  COSY NMR of 11,12-**BEM** from 3.0 to 0.7 ppm (400 MHz, rt,  $\text{CDCl}_3$ ).

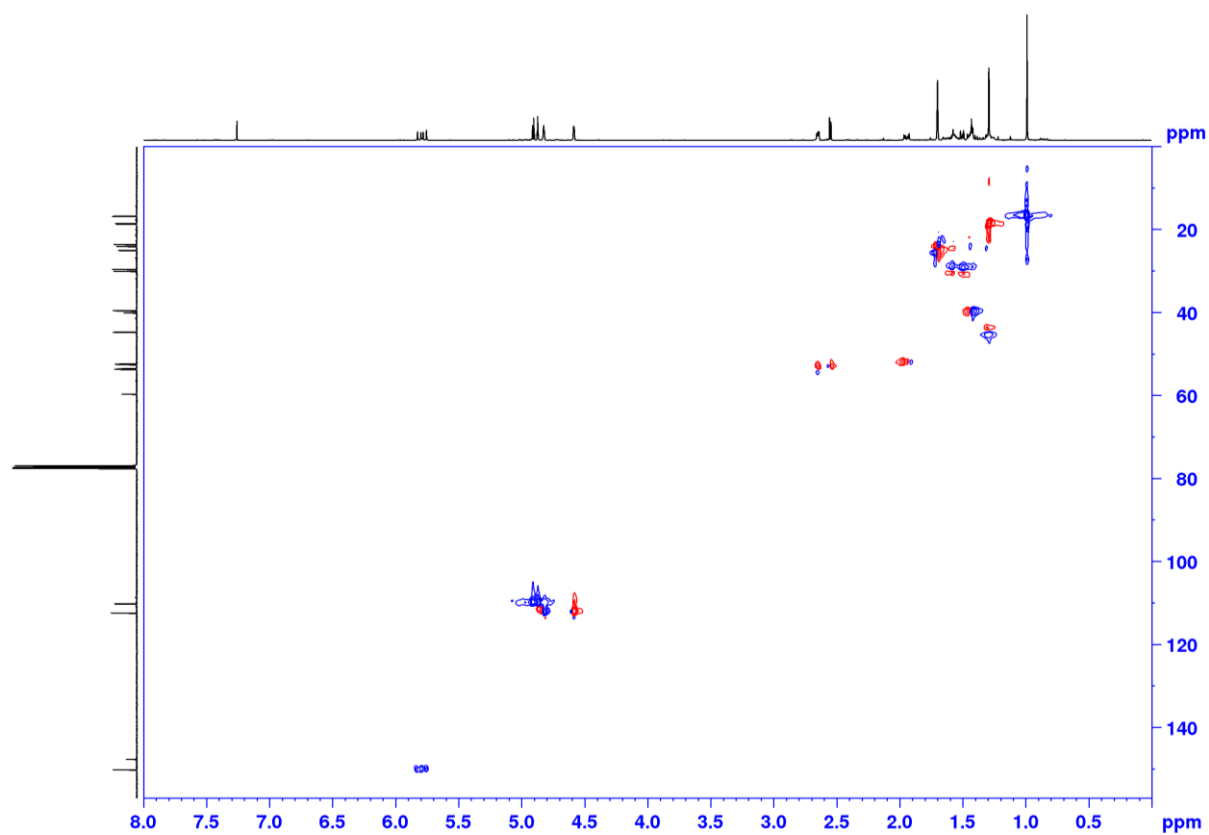

**Figure S25**  $^1\text{H}$ - $^{13}\text{C}$  HSQC NMR of 11,12-**BEM** (400 MHz, rt,  $\text{CDCl}_3$ ).



**Figure S26**  $^1\text{H}$  NMR of **BED** (400 MHz, rt,  $\text{CDCl}_3$ ).

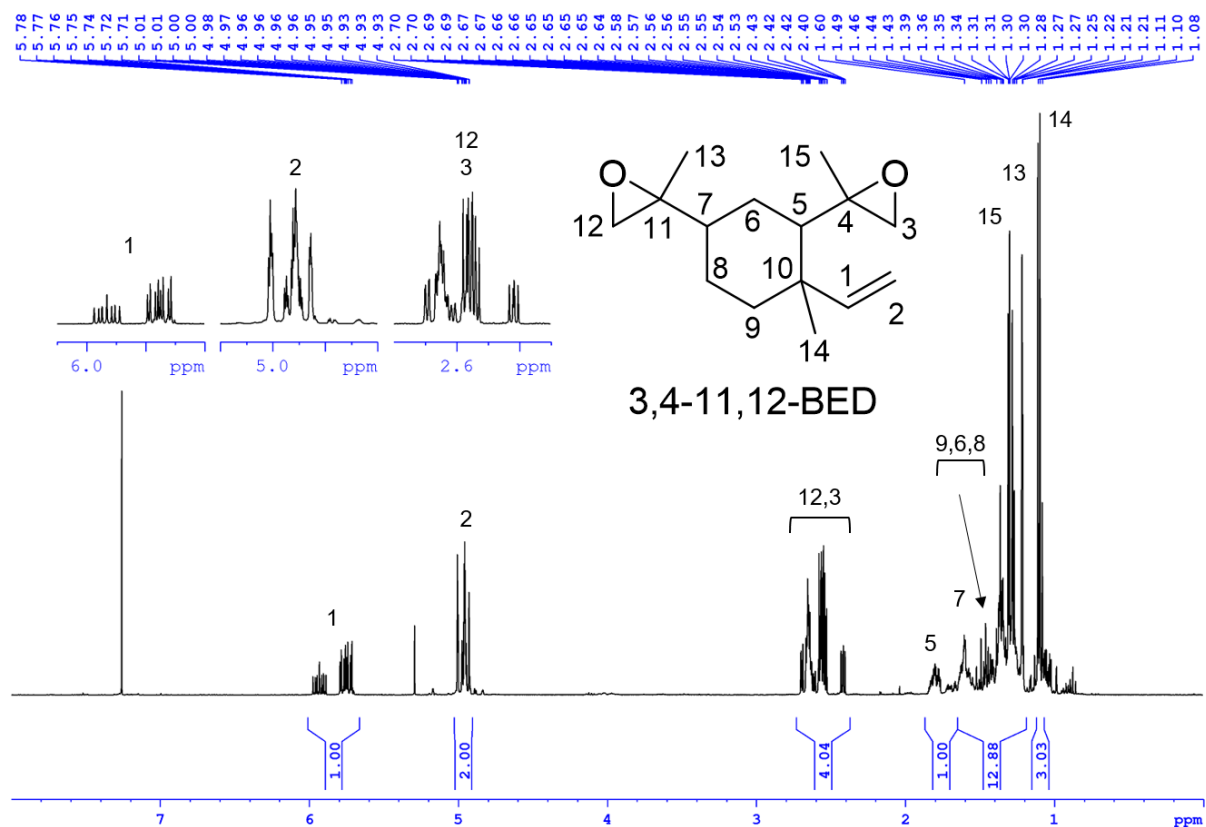

**Figure S26**  $^1\text{H}$  NMR of **BED** (400 MHz, rt,  $\text{CDCl}_3$ ).

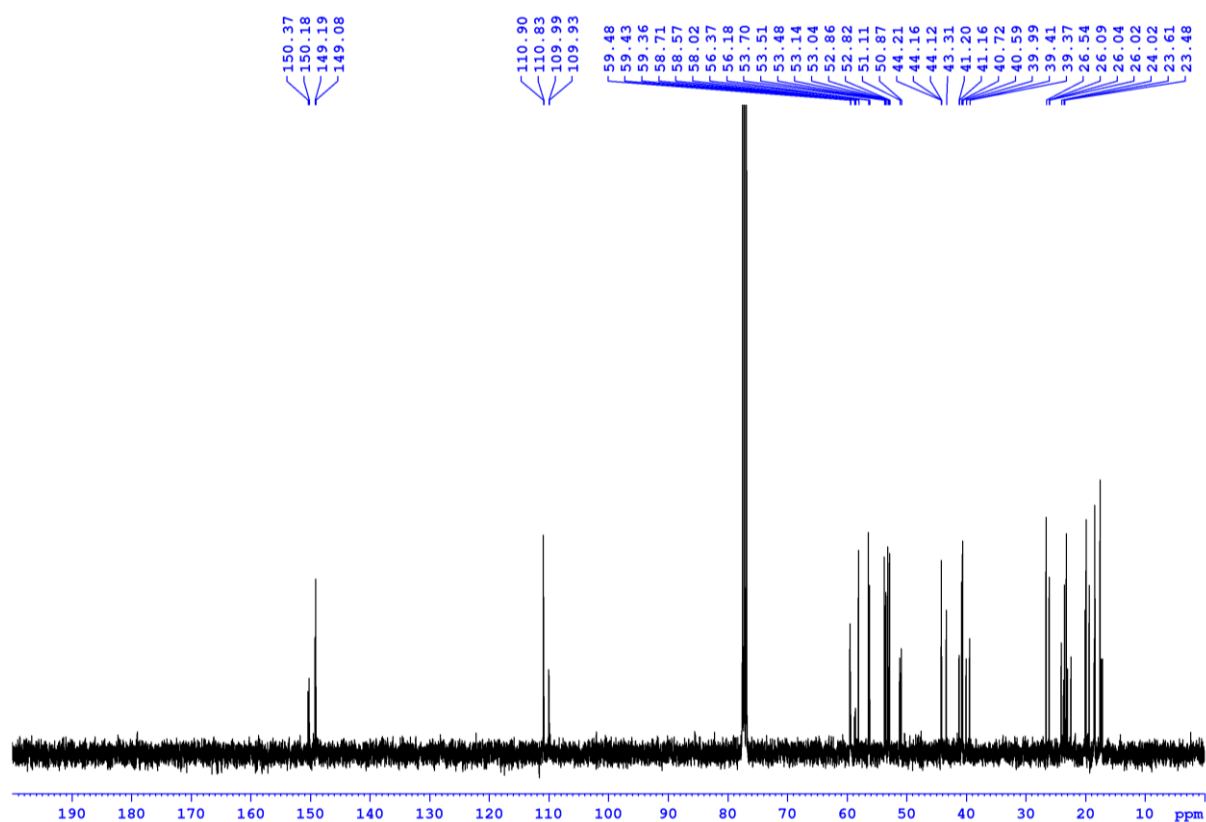

**Figure S27**  $^{13}\text{C}$  NMR of **BED** (400 MHz, rt,  $\text{CDCl}_3$ ).

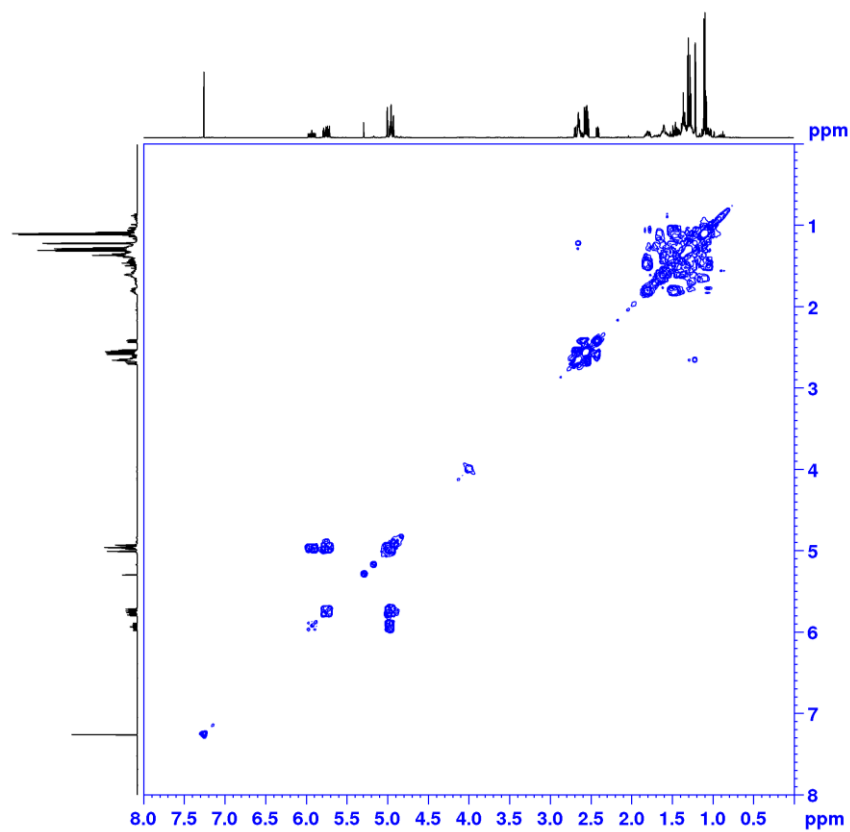

**Figure S28**  $^1\text{H}$ - $^1\text{H}$  COSY NMR of **BED** (400 MHz, rt,  $\text{CDCl}_3$ ).

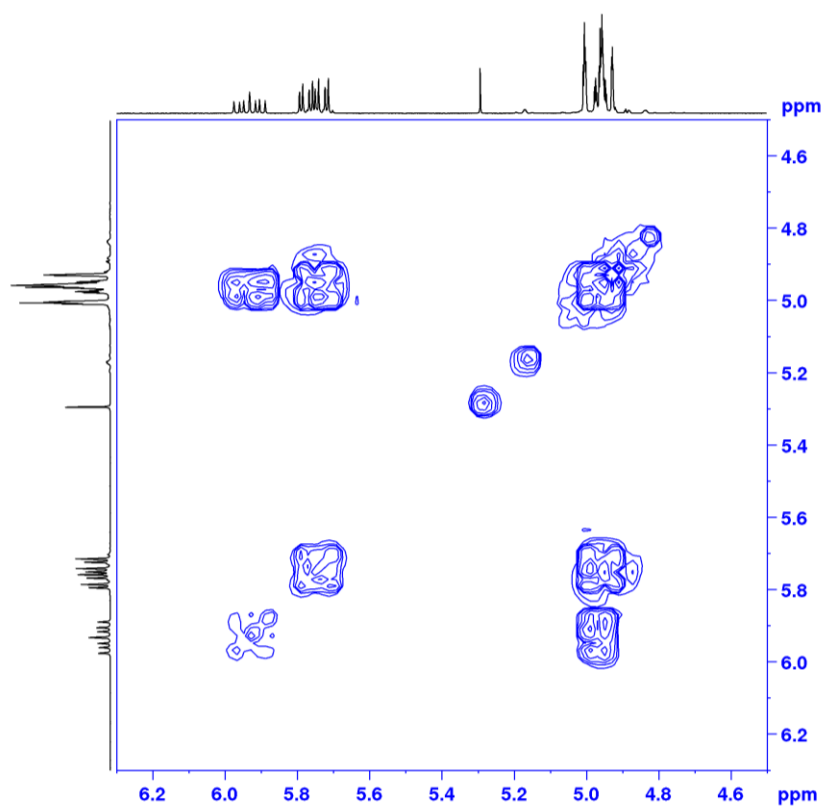

**Figure S29**  $^1\text{H}$ - $^1\text{H}$  COSY NMR of **BED** from 6.3 to 4.5 ppm (400 MHz, rt,  $\text{CDCl}_3$ ).

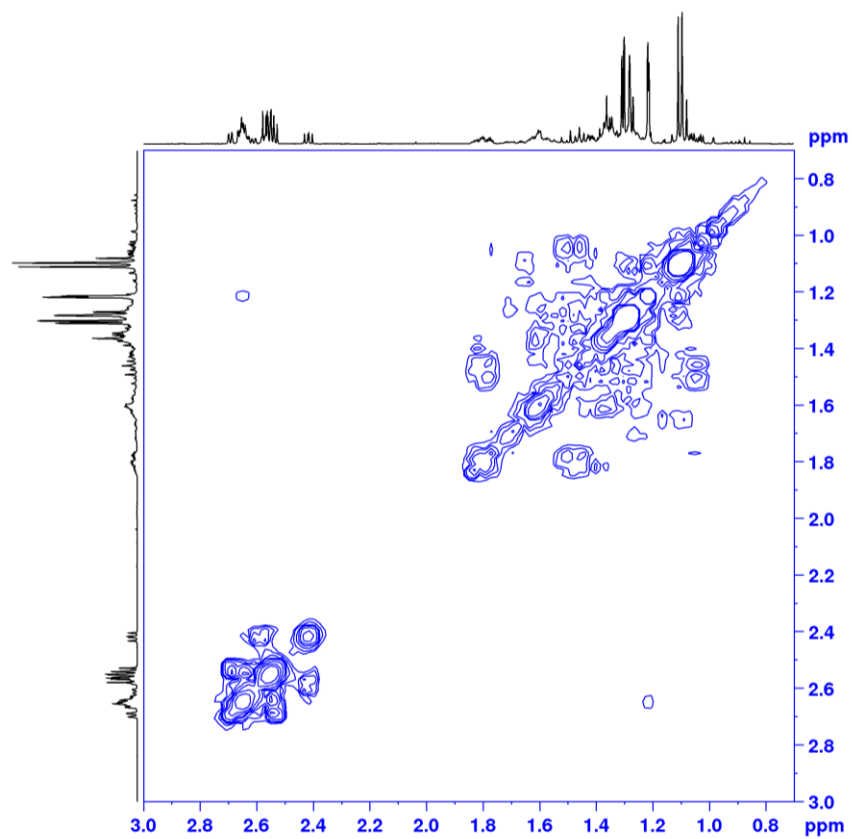

**Figure S30**  $^1\text{H}$ - $^1\text{H}$  COSY NMR of **BED** from 3.0 to 0.7 ppm (400 MHz, rt,  $\text{CDCl}_3$ ).

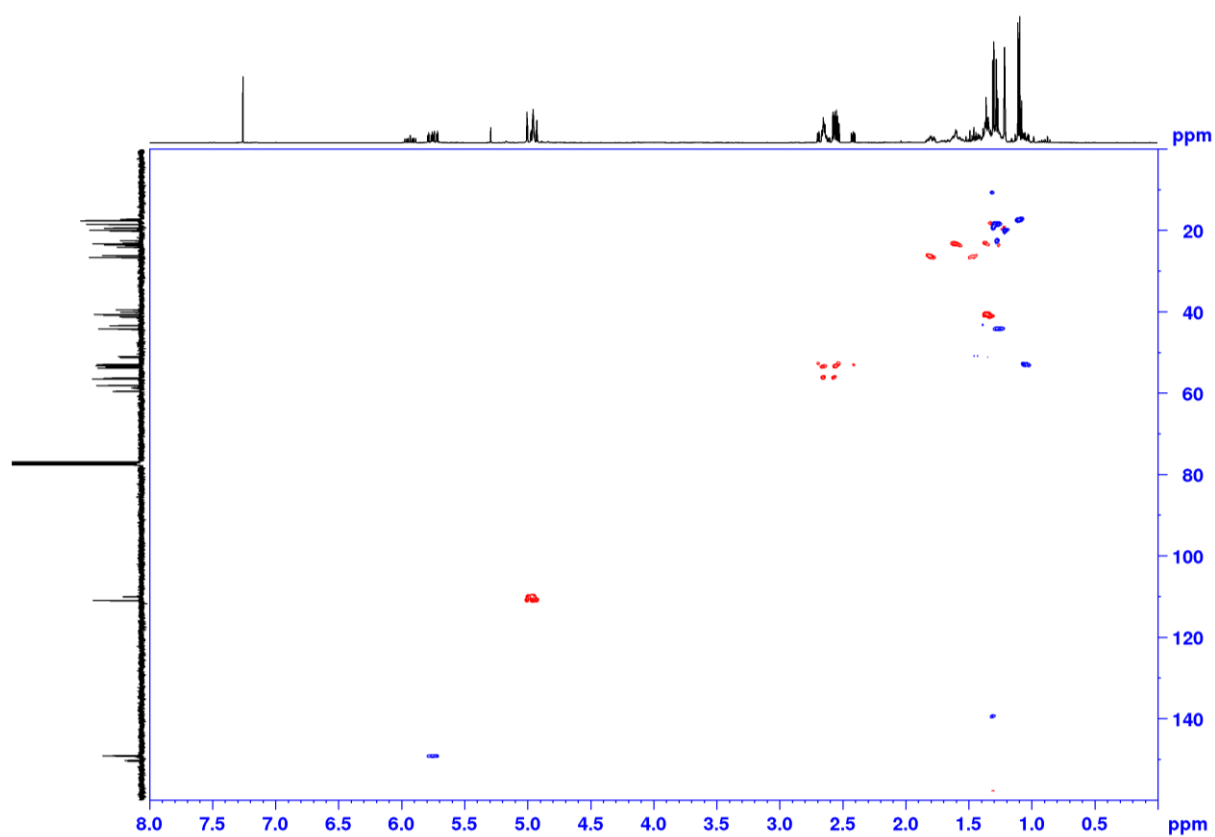

**Figure S31**  $^1\text{H}$ - $^{13}\text{C}$  HSQC NMR of **BED** (400 MHz, rt,  $\text{CDCl}_3$ ).

## NMR Characterization of BET

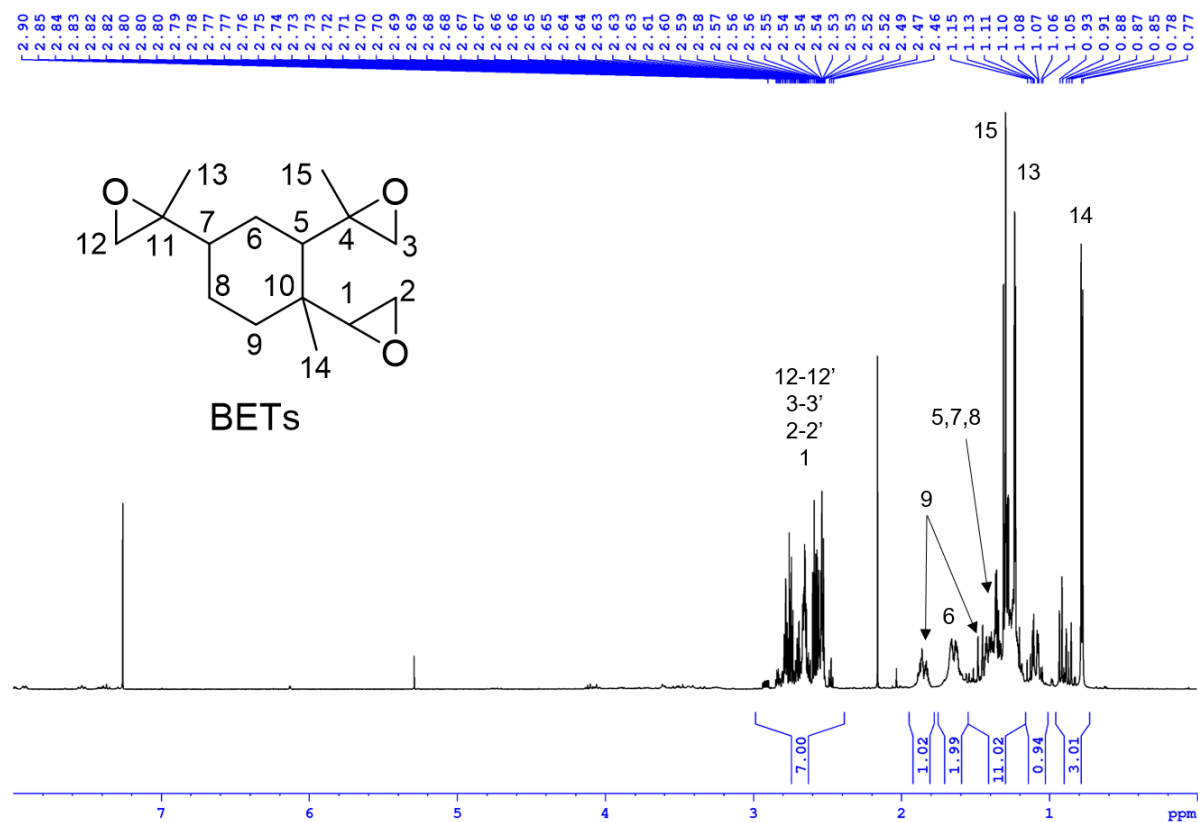

Figure S32 <sup>1</sup>H NMR of **BET** (400 MHz, rt, CDCl<sub>3</sub>).

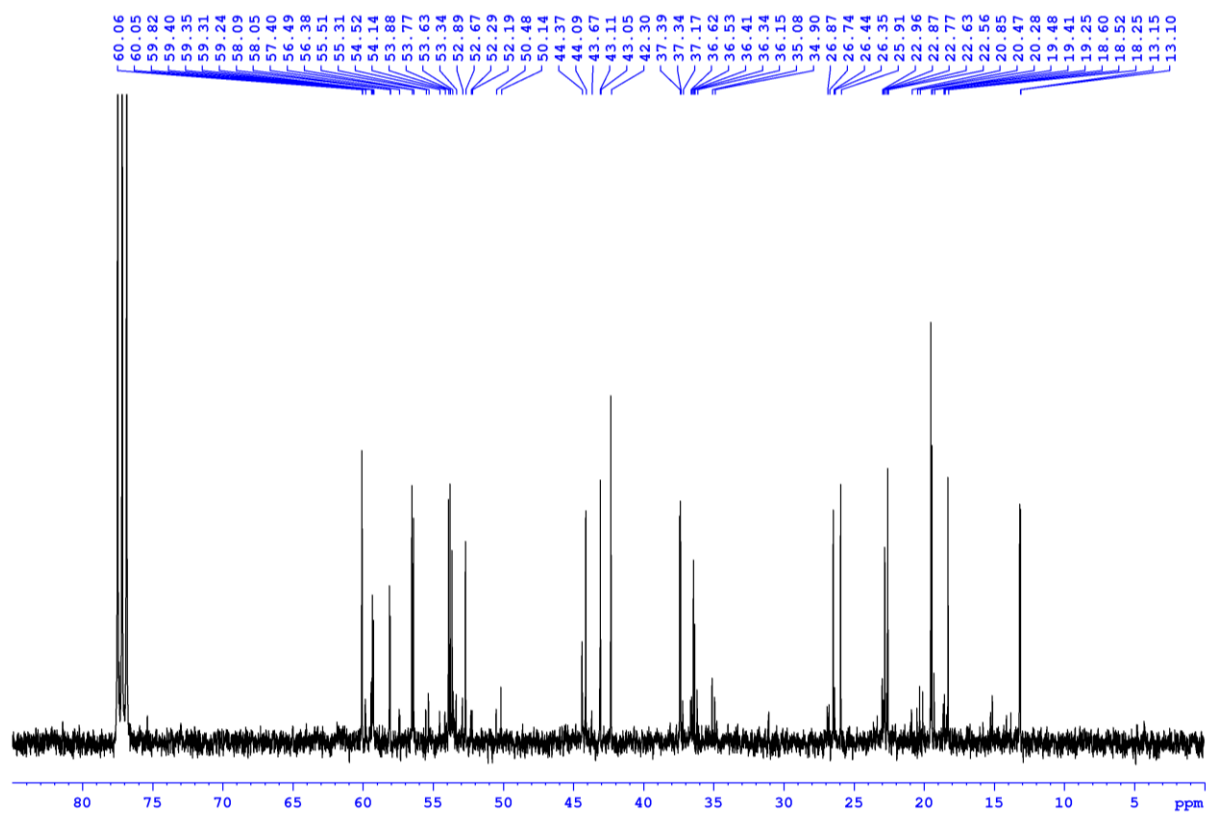

Figure S33 <sup>13</sup>C NMR of **BET** (400 MHz, rt, CDCl<sub>3</sub>).

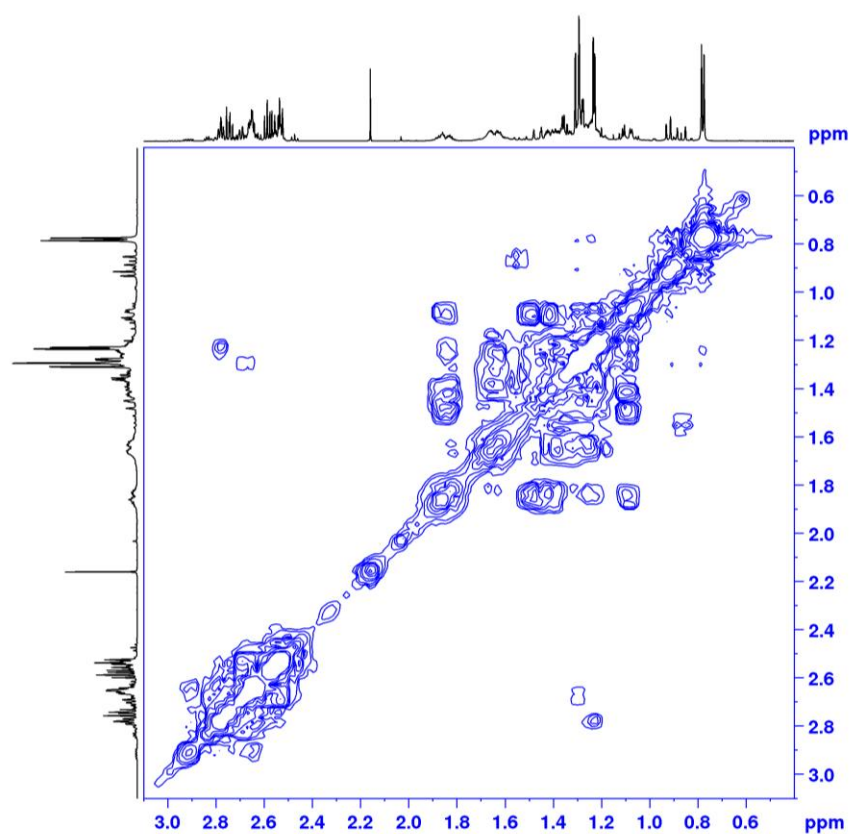

**Figure S34**  $^1\text{H}$ - $^1\text{H}$  COSY NMR of **BET** (400 MHz, rt,  $\text{CDCl}_3$ ).

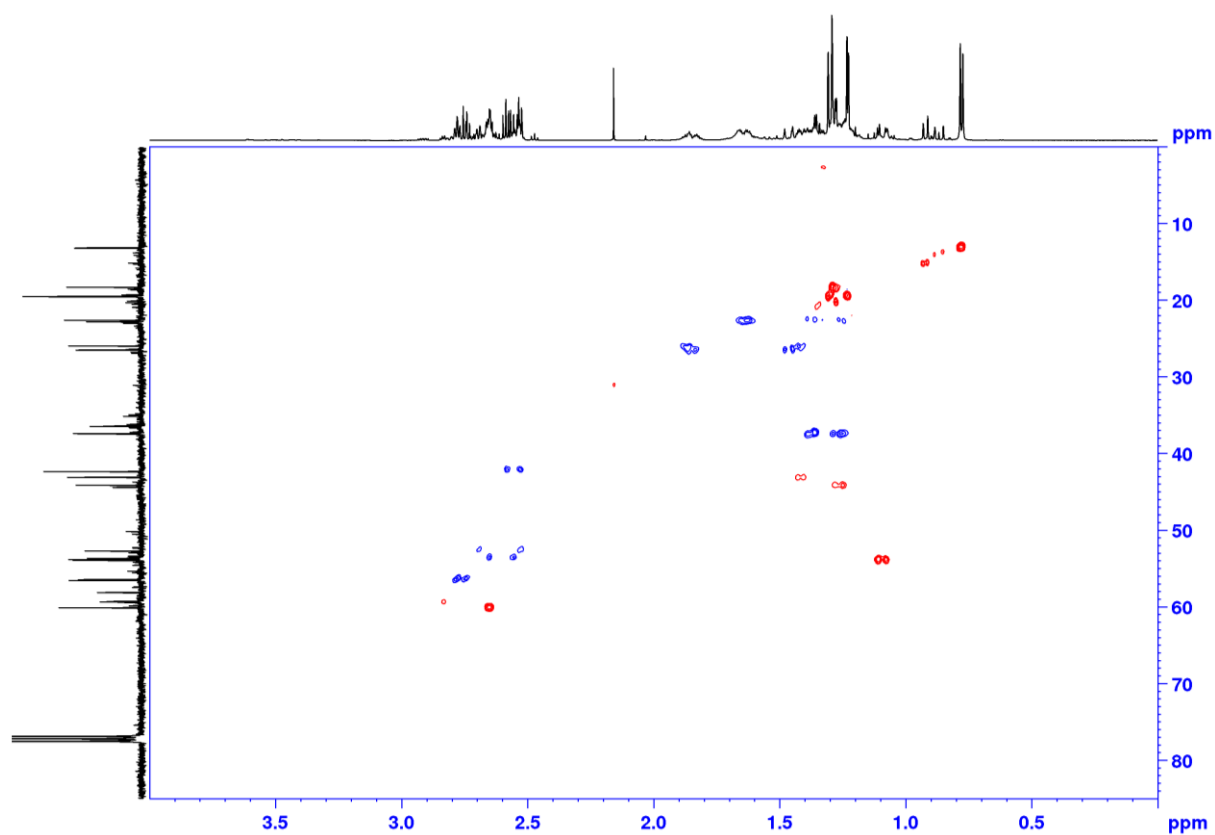

**Figure S35**  $^1\text{H}$ - $^{13}\text{C}$  HSQC NMR of **BET** (400 MHz, rt,  $\text{CDCl}_3$ ).

# NMR Characterization of Poly(BEM-*alt*-PA)

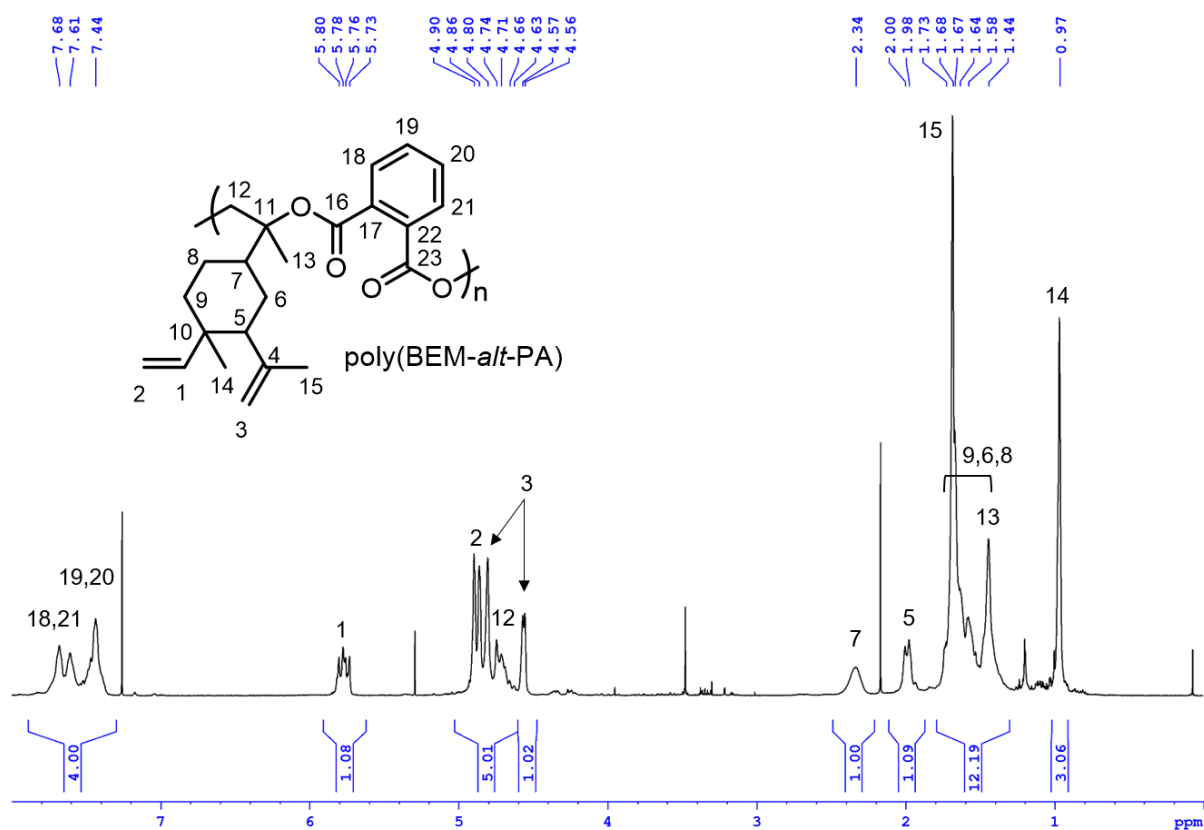

Figure S36 <sup>1</sup>H NMR of poly(BEM-*alt*-PA) (400 MHz, rt, CDCl<sub>3</sub>).

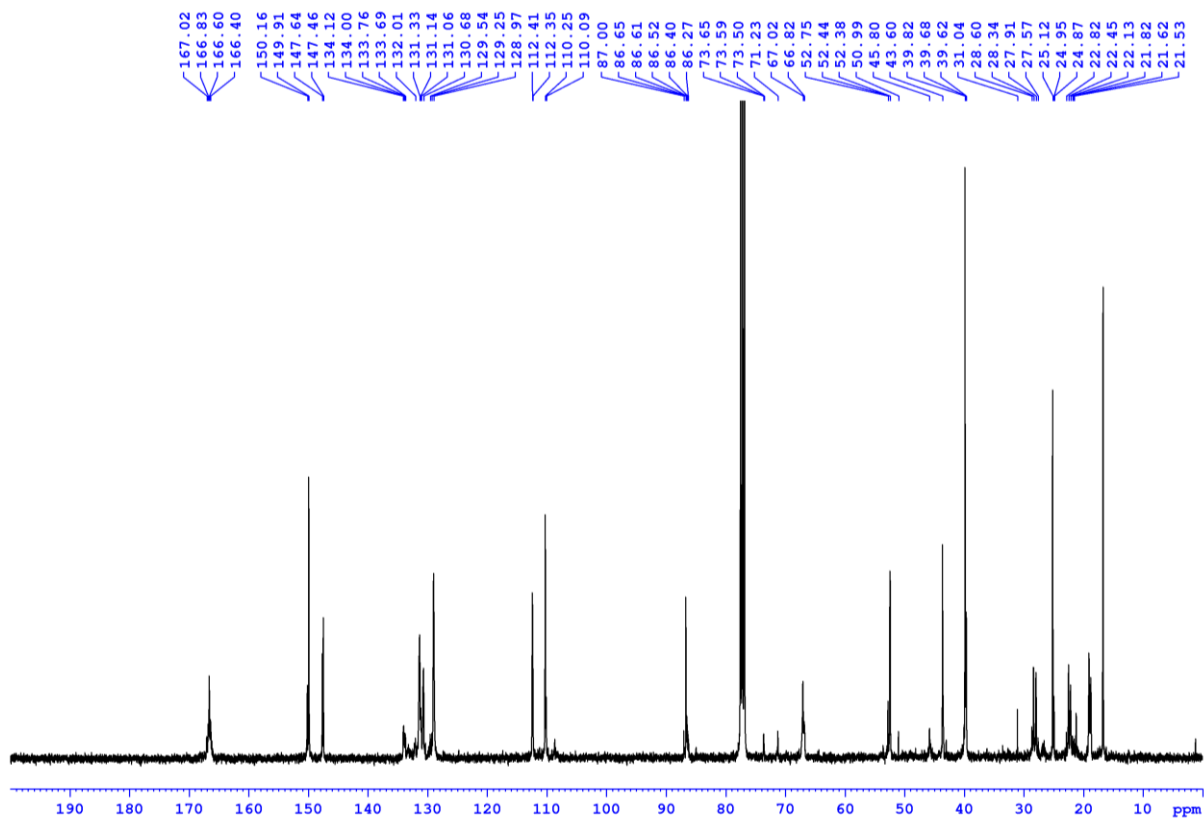

Figure S37 <sup>13</sup>C NMR of poly(BEM-*alt*-PA) (400 MHz, rt, CDCl<sub>3</sub>).

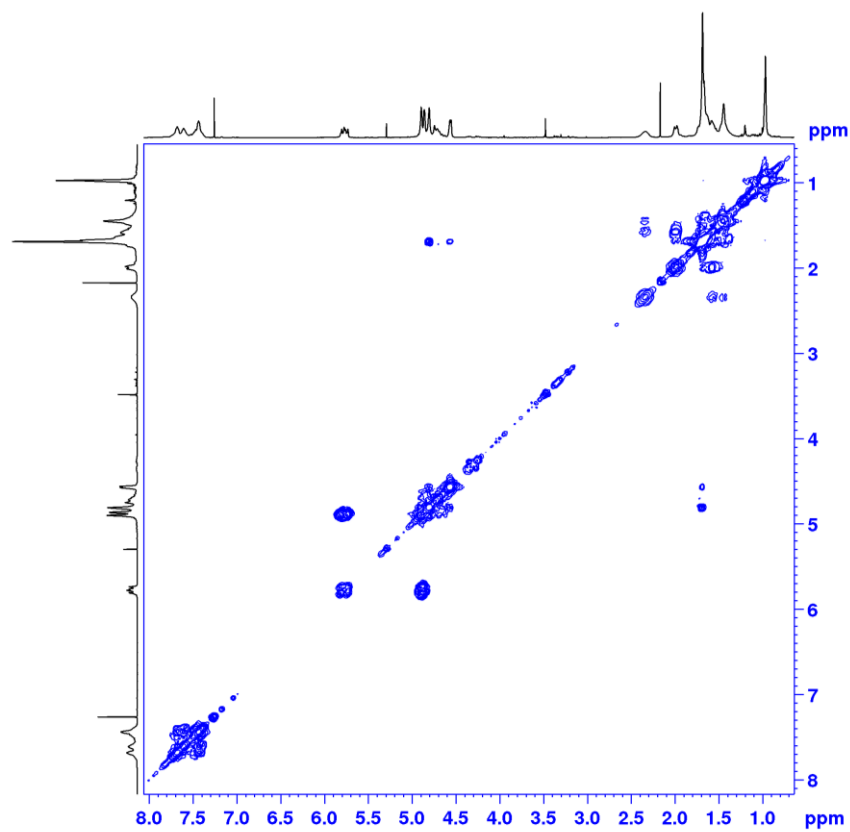

**Figure S38**  $^1\text{H}$ - $^1\text{H}$  COSY NMR of poly(**BEM**-*alt*-**PA**) (400 MHz, rt,  $\text{CDCl}_3$ ).

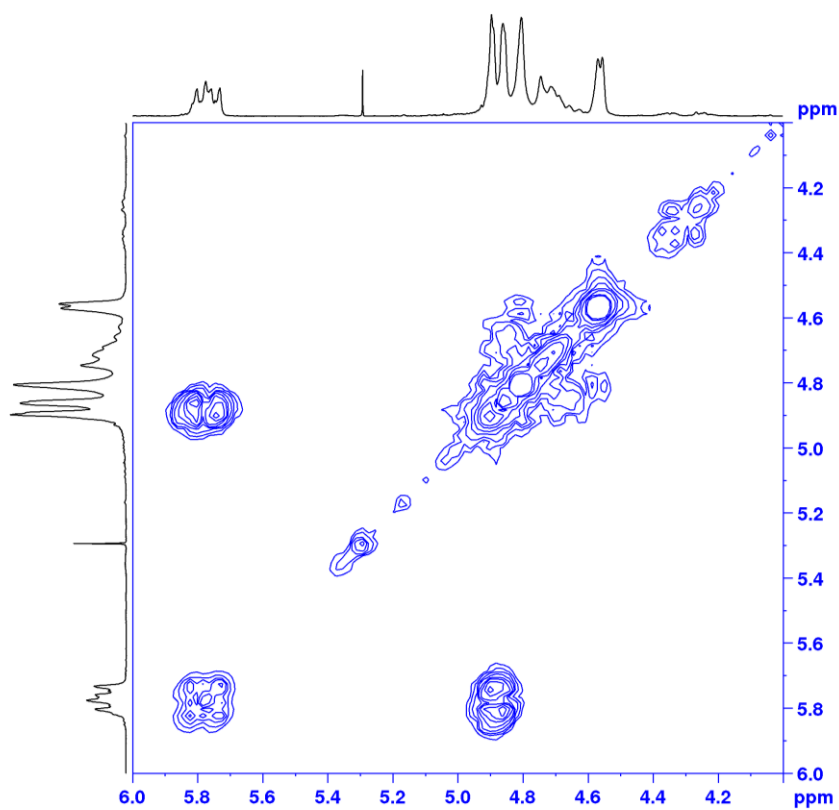

**Figure S39**  $^1\text{H}$ - $^1\text{H}$  COSY NMR of poly(**BEM**-*alt*-**PA**) from 6.0 to 4.0 ppm (400 MHz, rt,  $\text{CDCl}_3$ ).

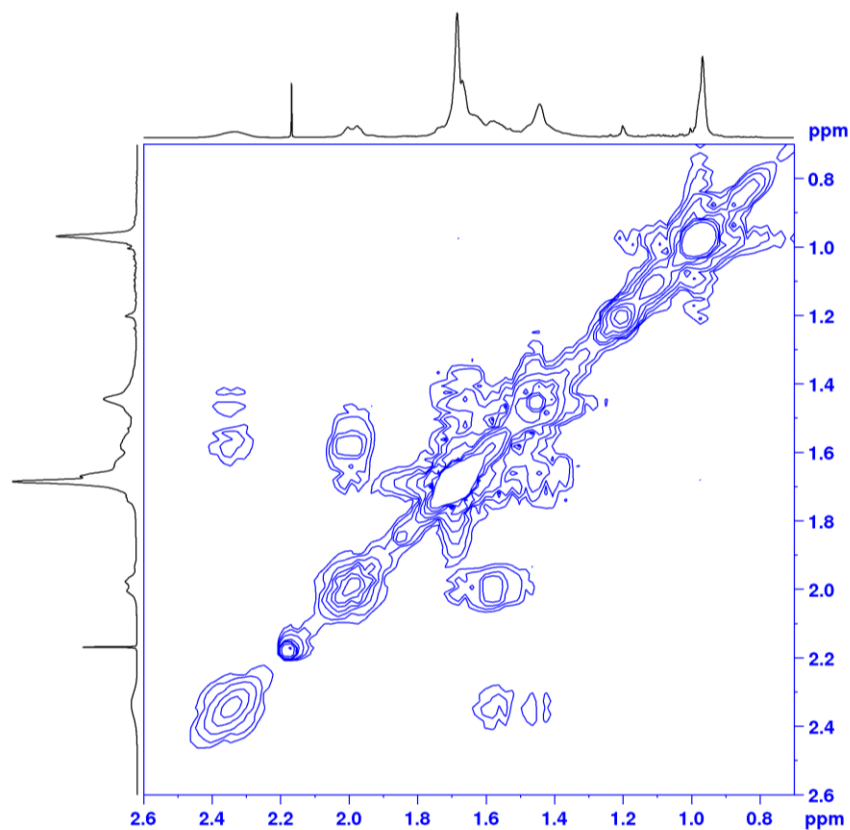

**Figure S40**  $^1\text{H}$ - $^1\text{H}$  COSY NMR of poly(**BEM**-*alt*-**PA**) from 2.6 to 0.7 ppm (400 MHz, rt,  $\text{CDCl}_3$ ).

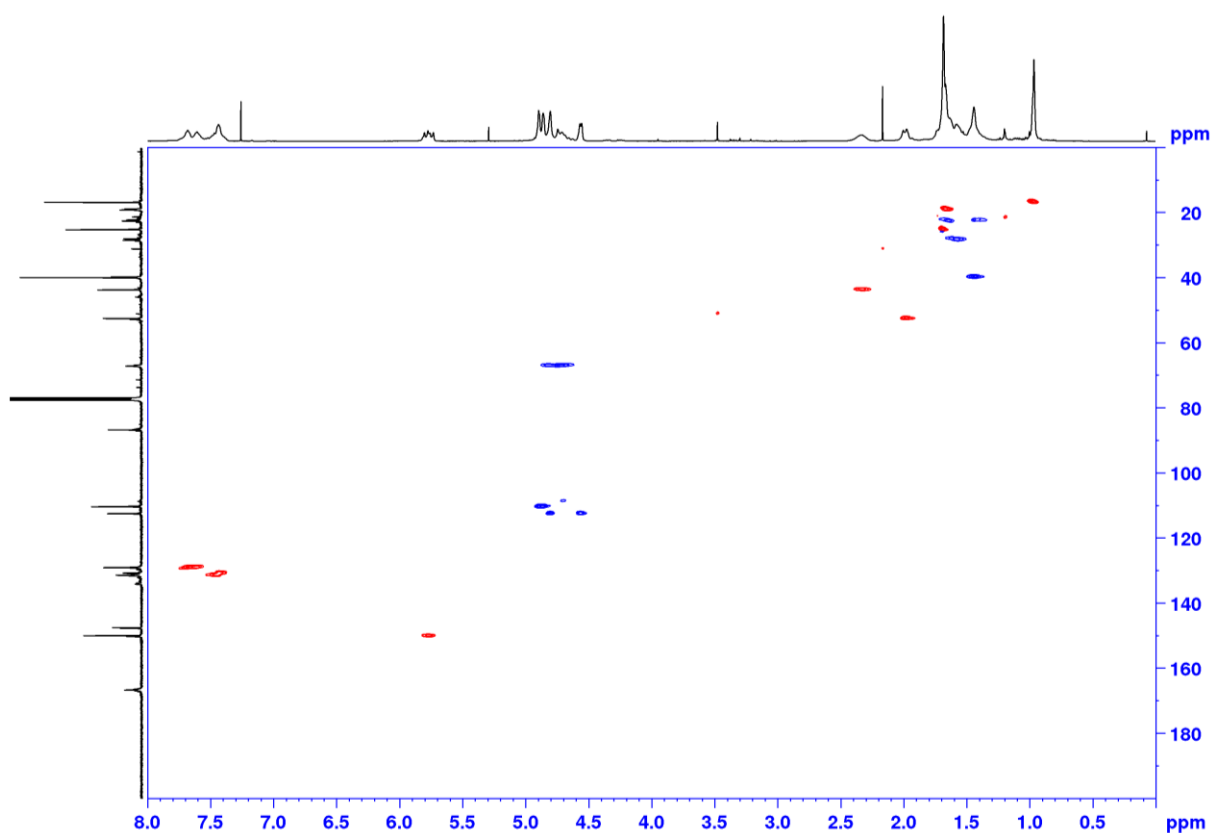

**Figure S41**  $^1\text{H}$ - $^{13}\text{C}$  HSQC NMR of poly(**BEM**-*alt*-**PA**) (400 MHz, rt,  $\text{CDCl}_3$ ).



# NMR Characterization of Crosslinked Poly(BED-*alt*-PA)

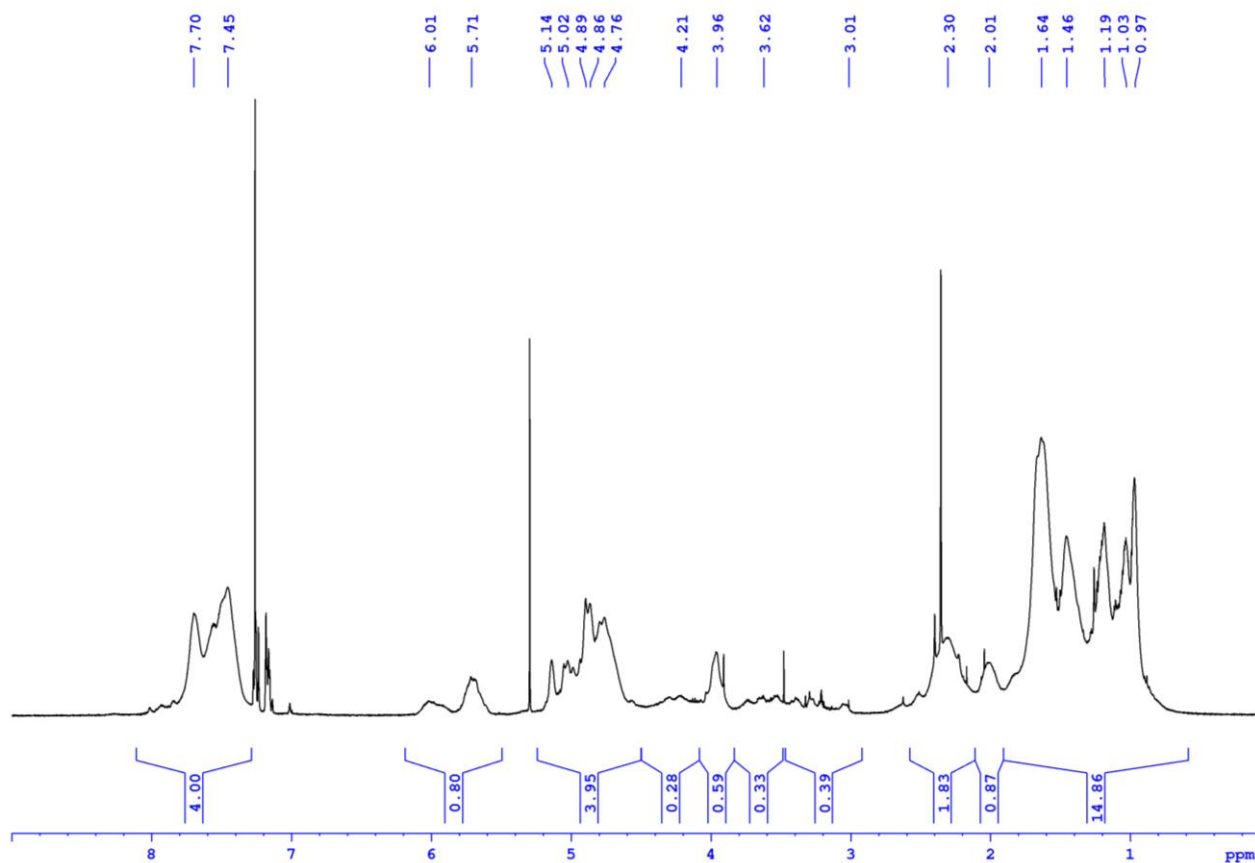

**Figure S42** <sup>1</sup>H NMR of crosslinked poly(BED-*alt*-PA) (400 MHz, rt, CDCl<sub>3</sub>).

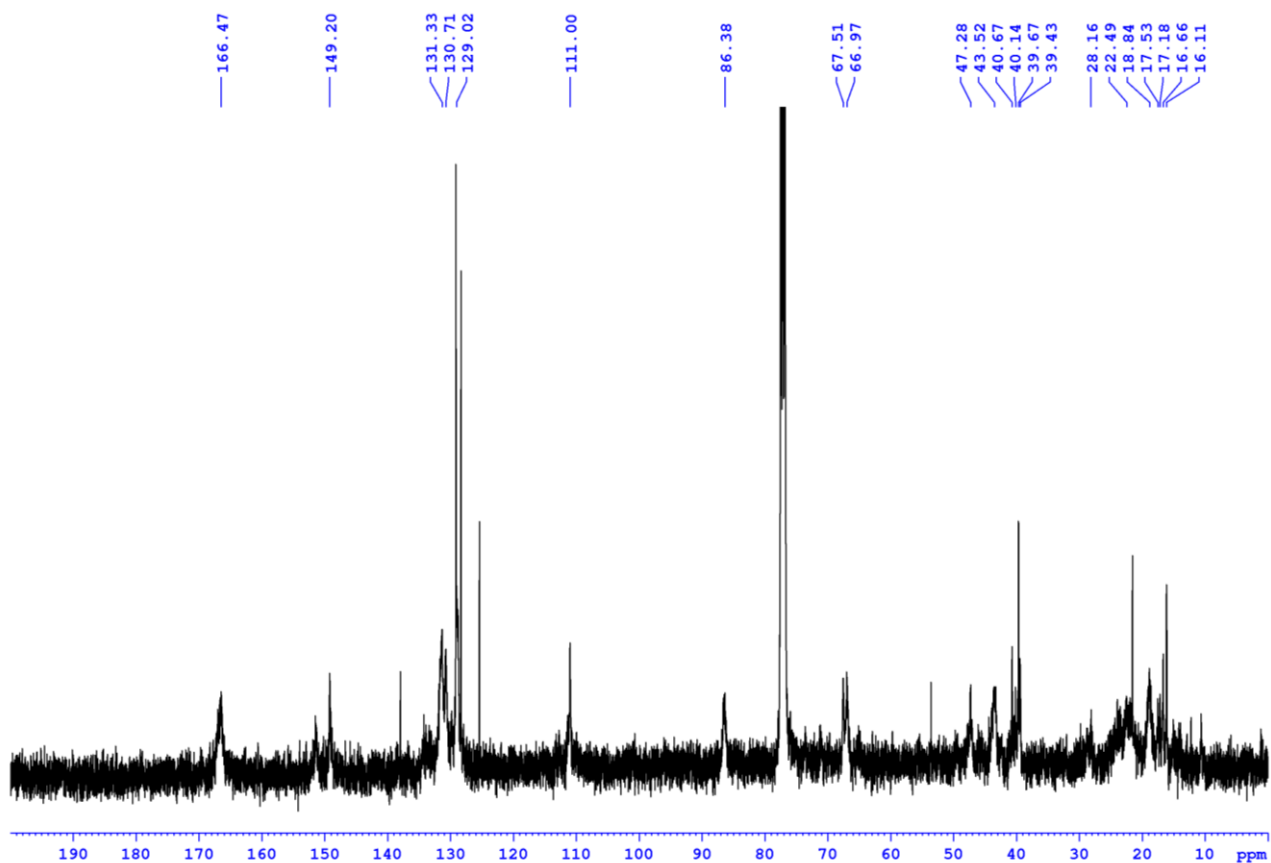

**Figure S43** <sup>13</sup>C NMR of crosslinked poly(BED-*alt*-PA) (400 MHz, rt, CDCl<sub>3</sub>).



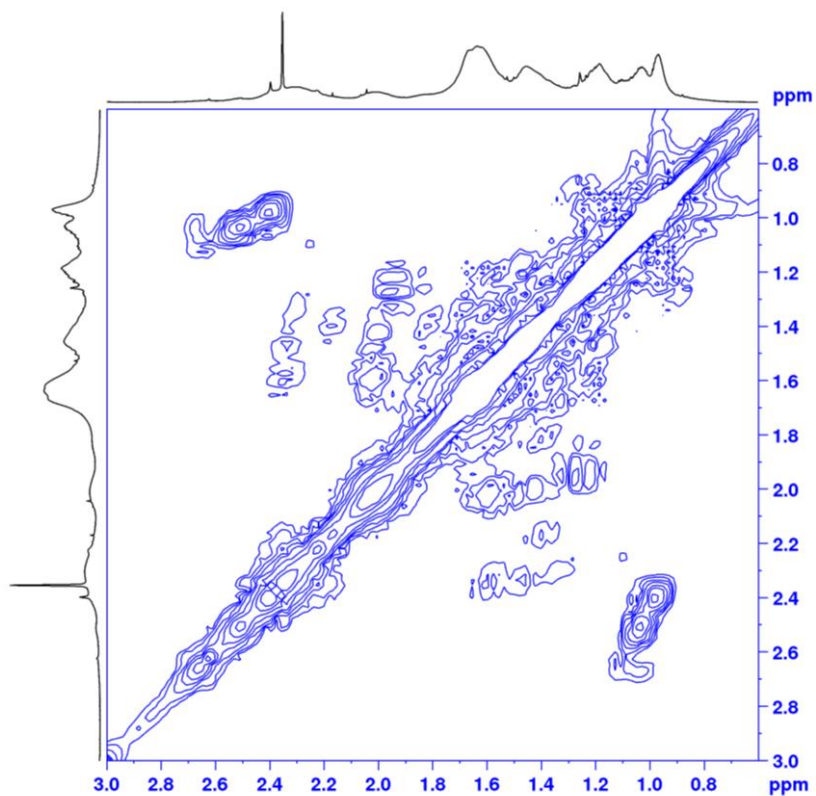

**Figure S46**  $^1\text{H}$ - $^1\text{H}$  COSY NMR of crosslinked poly(**BED-alt-PA**) from 3.0 to 0.6 ppm (400 MHz, rt,  $\text{CDCl}_3$ ).

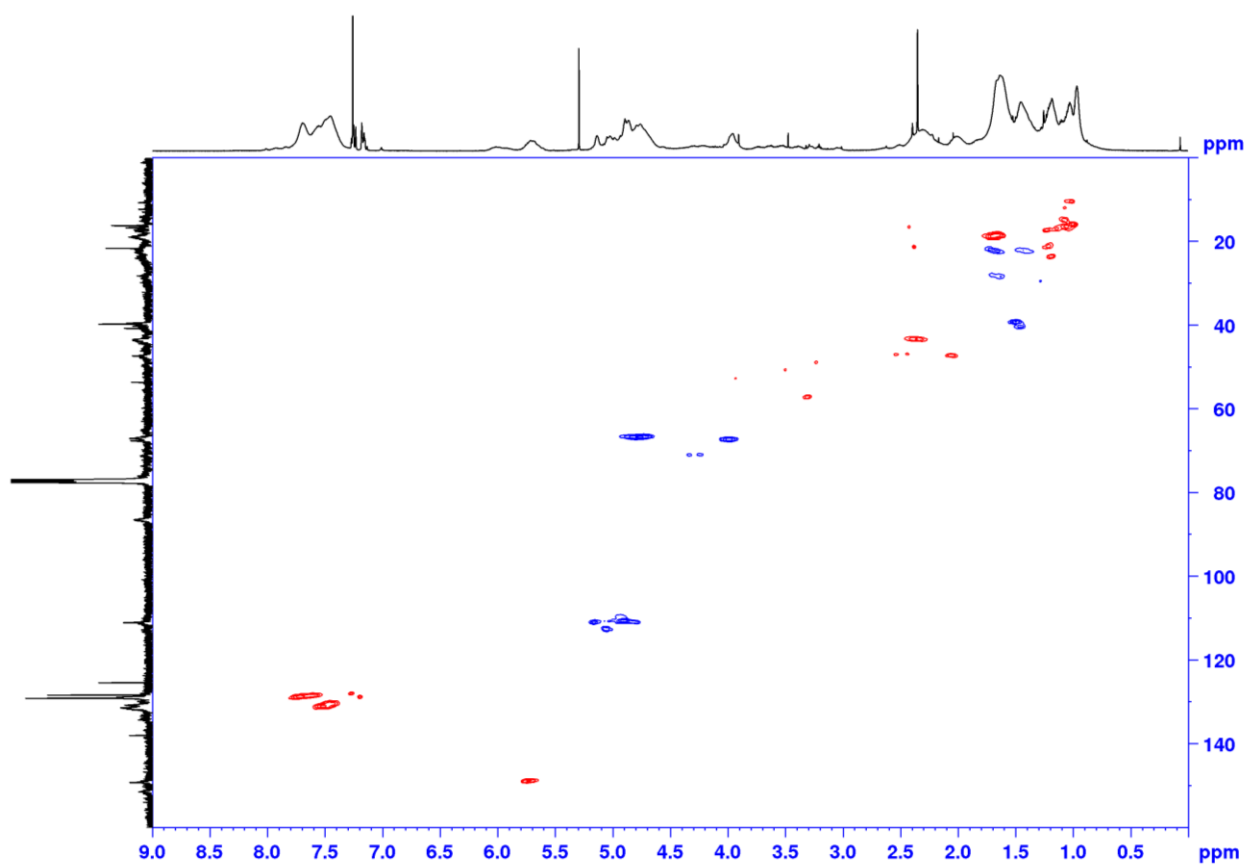

**Figure S47**  $^1\text{H}$ - $^{13}\text{C}$  HSQC NMR of crosslinked poly(**BED-alt-PA**) (400 MHz, rt,  $\text{CDCl}_3$ ).

## NMR Characterization of Poly(BED-*alt*-PA)

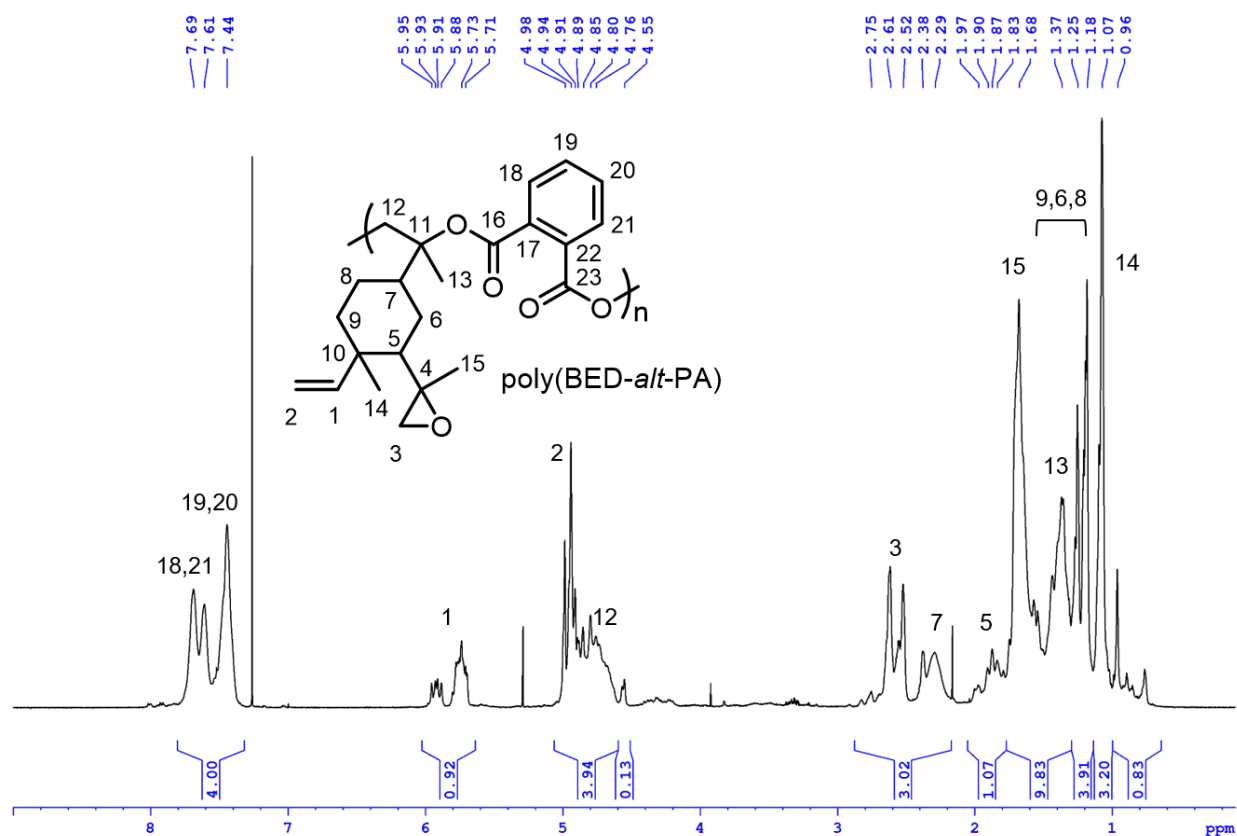

Figure S48  $^1\text{H}$  NMR of poly(BED-*alt*-PA) (400 MHz, rt,  $\text{CDCl}_3$ ).

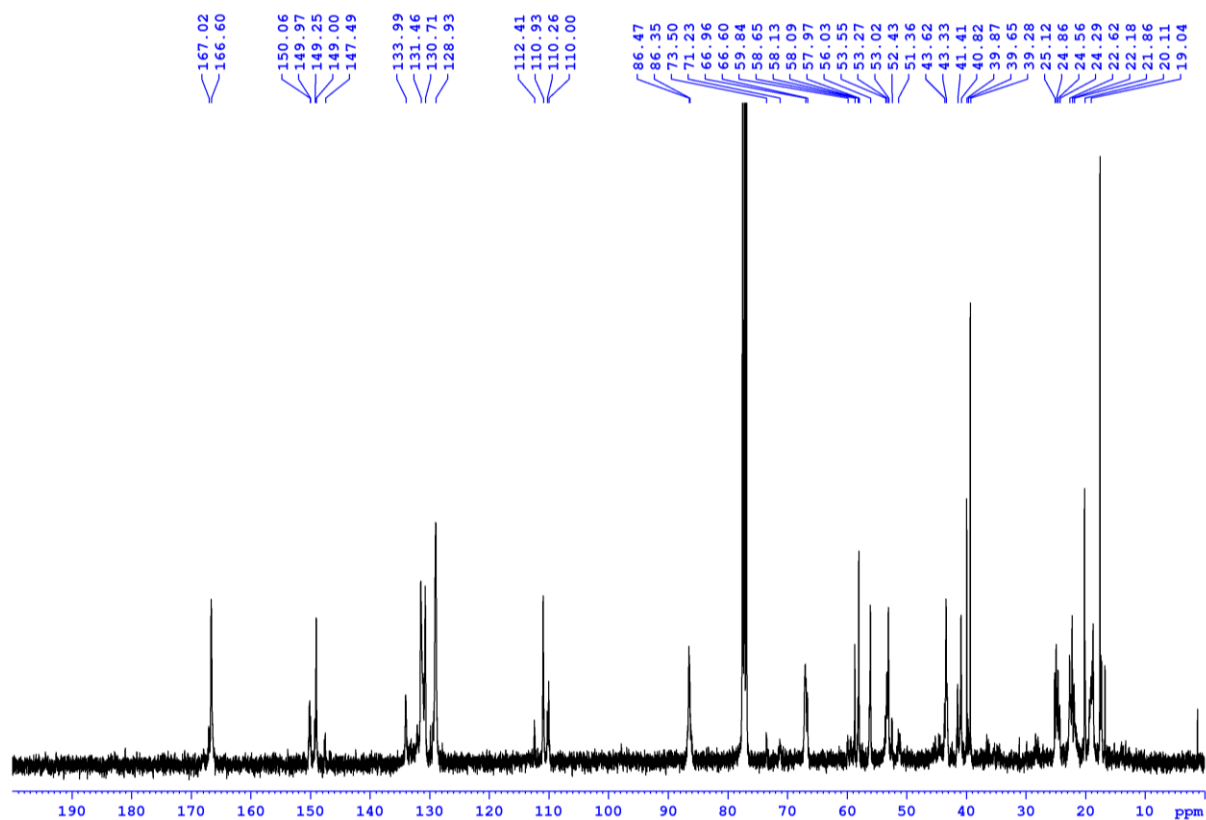

Figure S49  $^{13}\text{C}$  NMR of poly(BED-*alt*-PA) (400 MHz, rt,  $\text{CDCl}_3$ ).

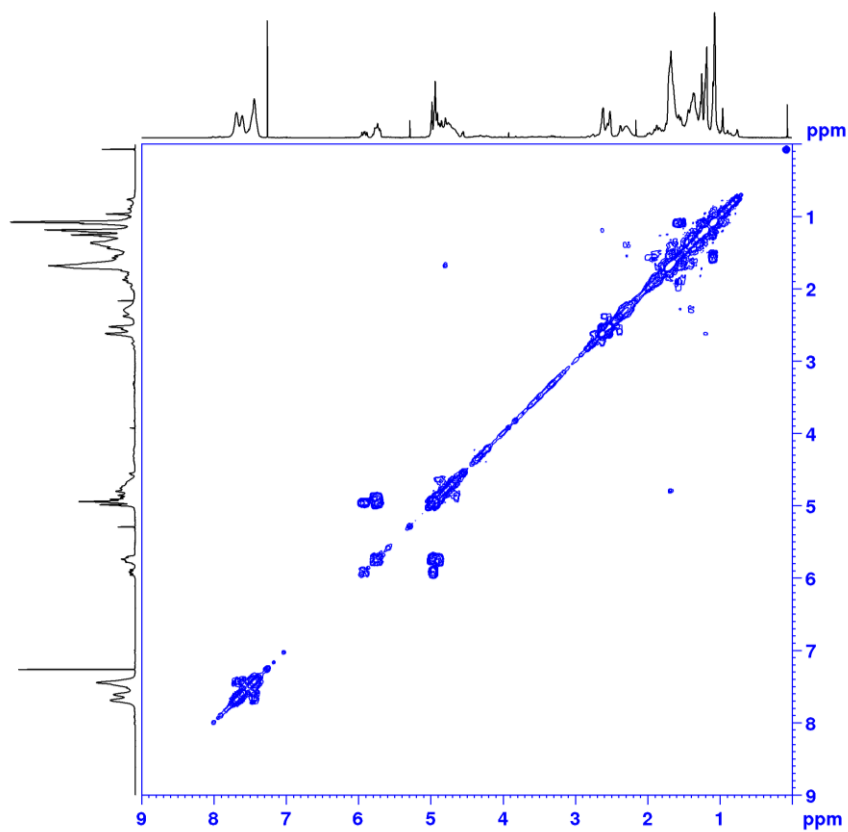

**Figure S50**  $^1\text{H}$ - $^1\text{H}$  COSY NMR of poly(**BED-alt-PA**) (400 MHz, rt,  $\text{CDCl}_3$ ).

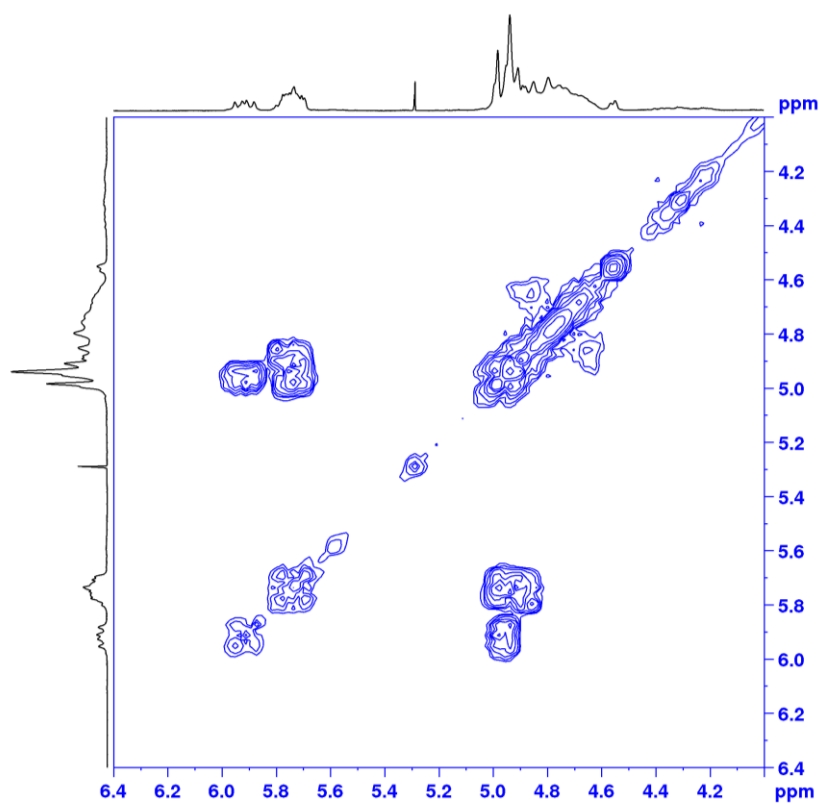

**Figure S51**  $^1\text{H}$ - $^1\text{H}$  COSY NMR of poly(**BED-alt-PA**) from 6.0 to 4.0 ppm (400 MHz, rt,  $\text{CDCl}_3$ ).

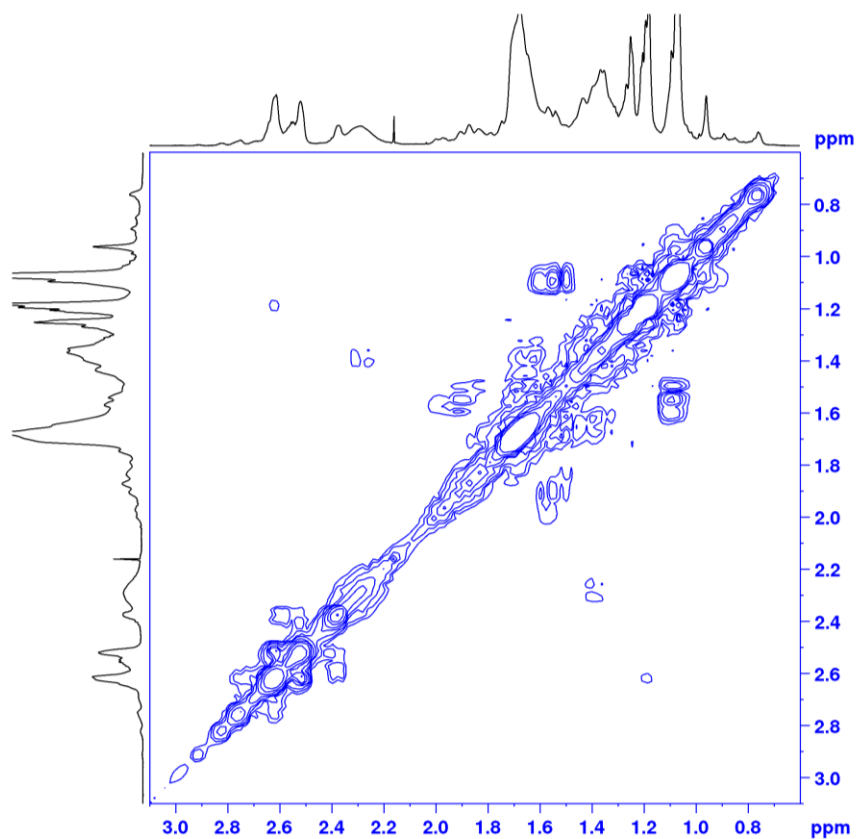

**Figure S52**  $^1\text{H}$ - $^1\text{H}$  COSY NMR of poly(**BED-*alt*-PA**) from 3.1 to 0.6 ppm (400 MHz, rt,  $\text{CDCl}_3$ ).

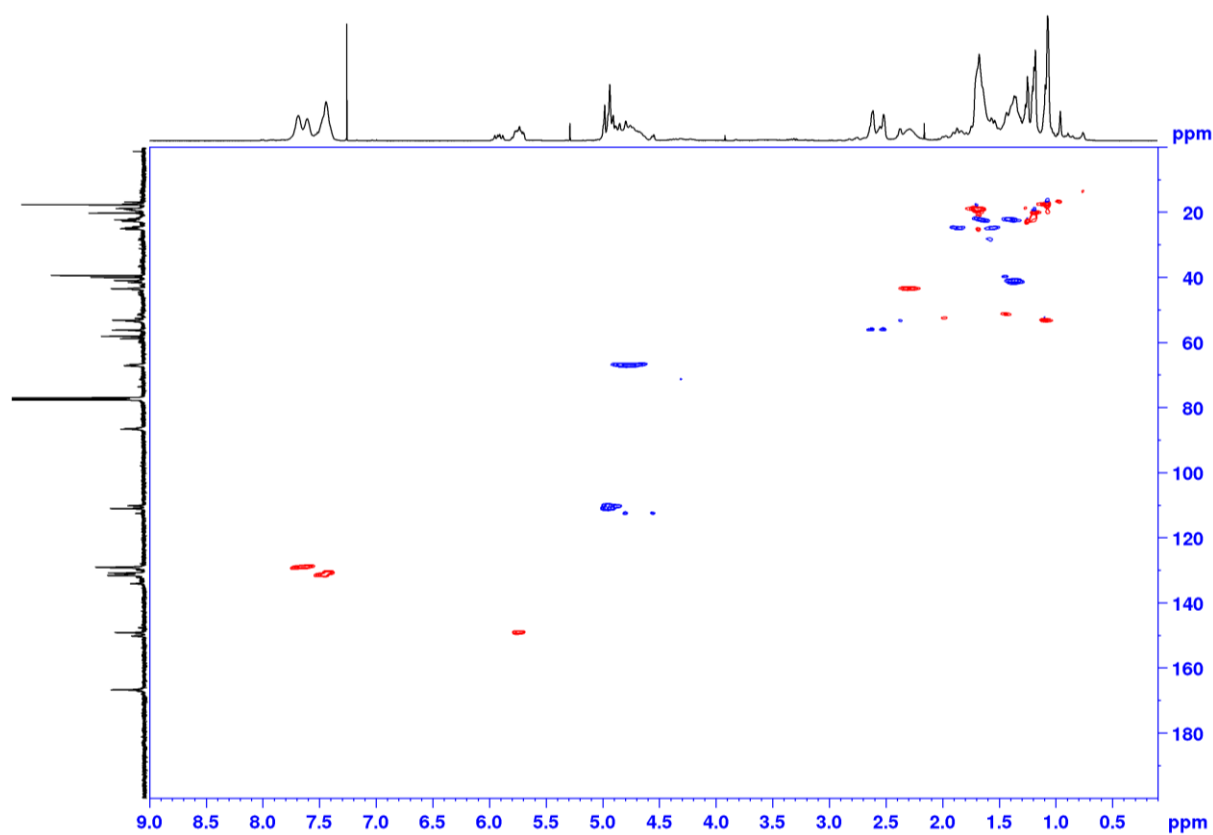

**Figure S53**  $^1\text{H}$ - $^{13}\text{C}$  HSQC NMR of poly(**BED-*alt*-PA**) (400 MHz, rt,  $\text{CDCl}_3$ ).

## NMR Characterization of Poly(BET-*alt*-PA)

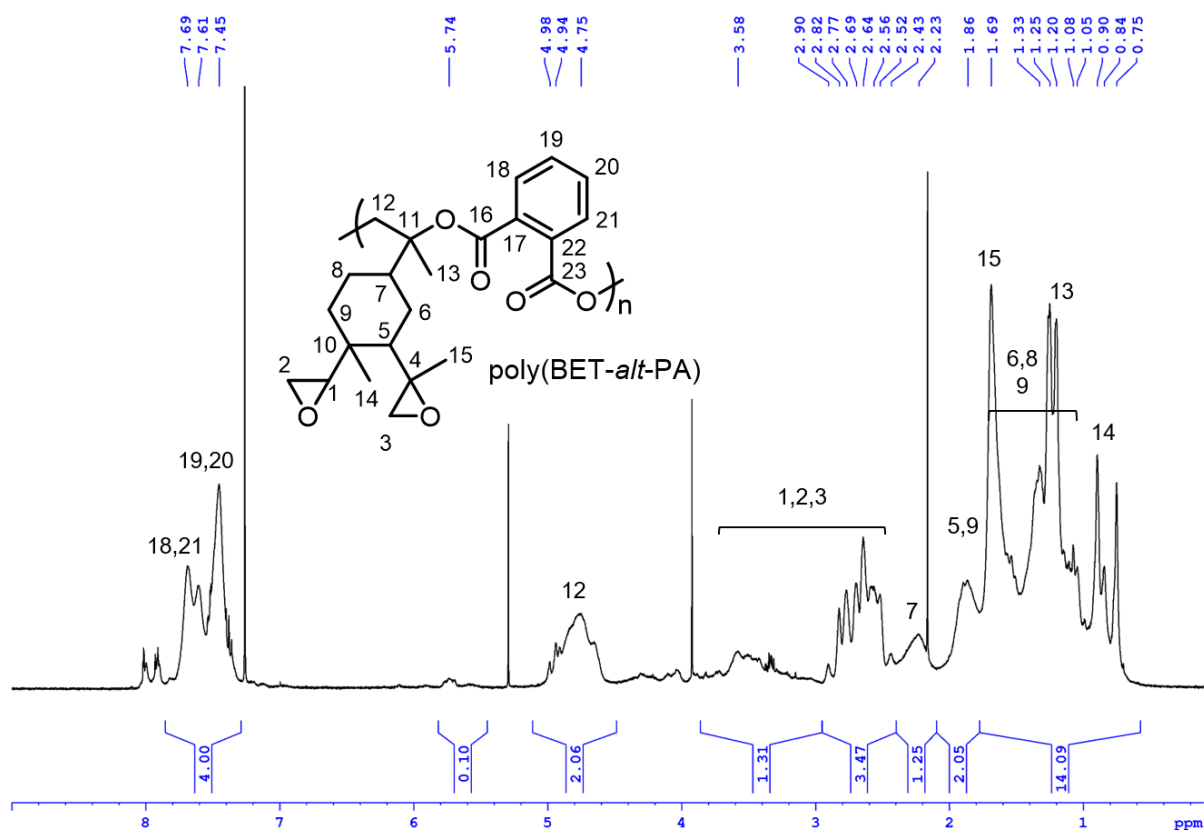

Figure S54  $^1\text{H}$  NMR of poly(BET-*alt*-PA) (400 MHz, rt,  $\text{CDCl}_3$ ).

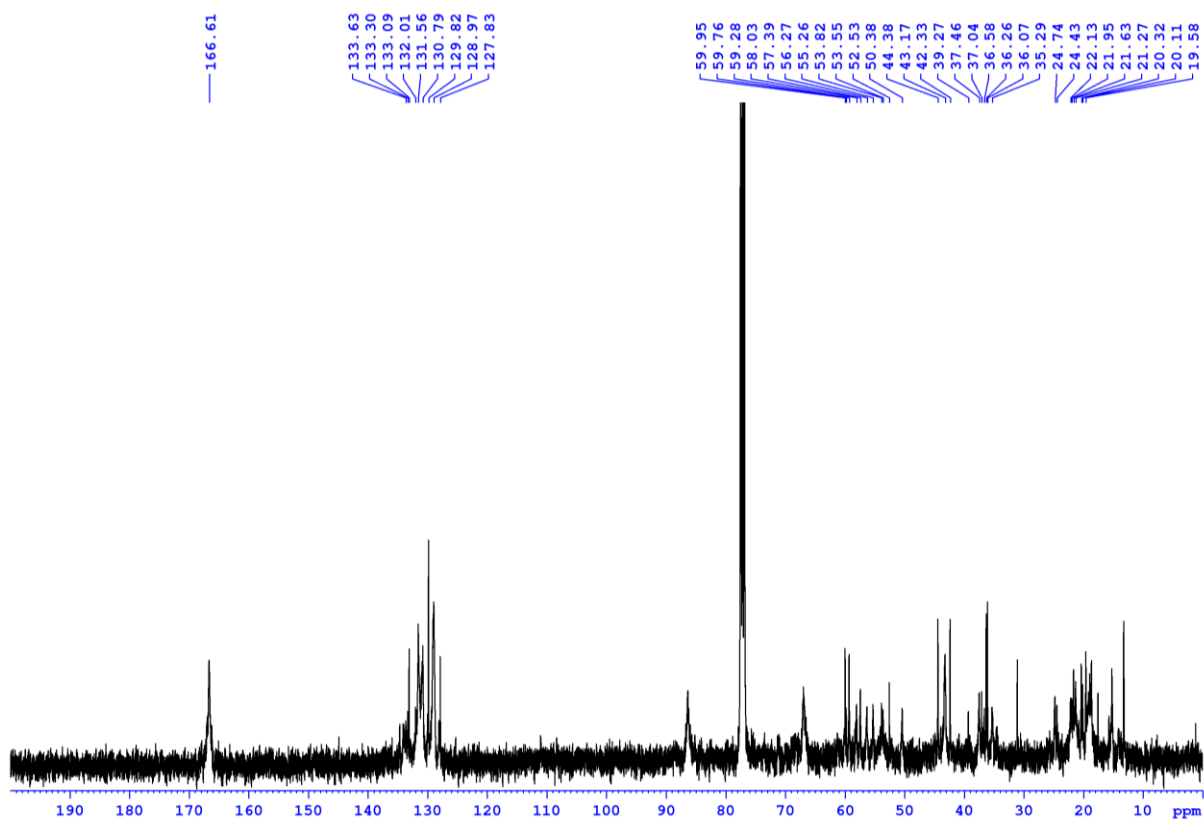

Figure S55  $^{13}\text{C}$  NMR of poly(BET-*alt*-PA) (400 MHz, rt,  $\text{CDCl}_3$ ).

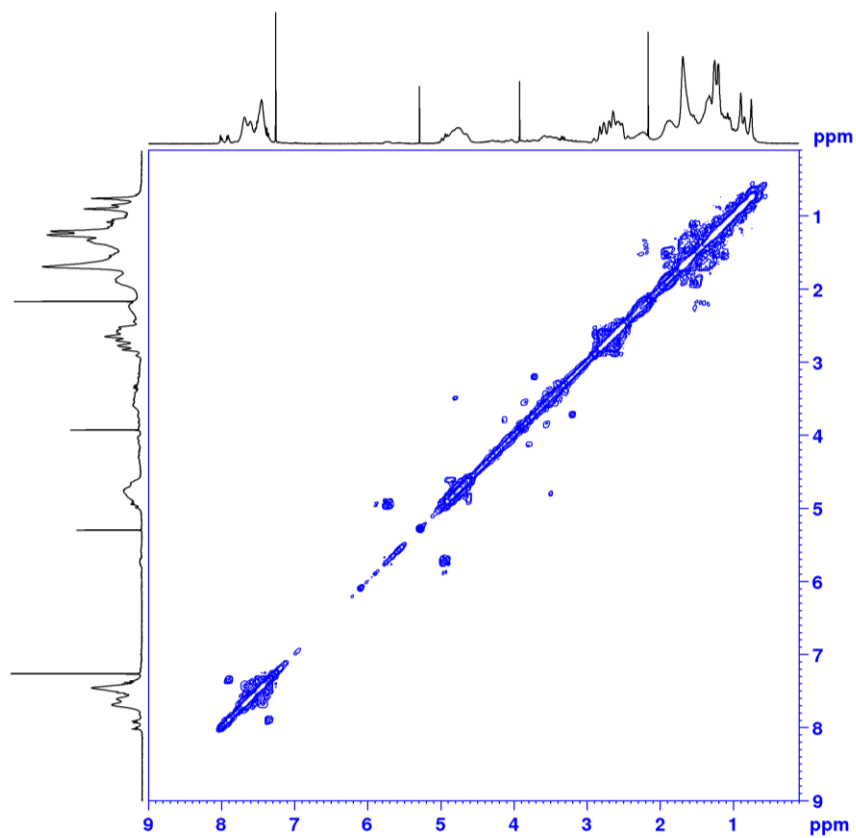

**Figure S56**  $^1\text{H}$ - $^1\text{H}$  COSY NMR of poly(**BET-alt-PA**) (400 MHz, rt,  $\text{CDCl}_3$ ).

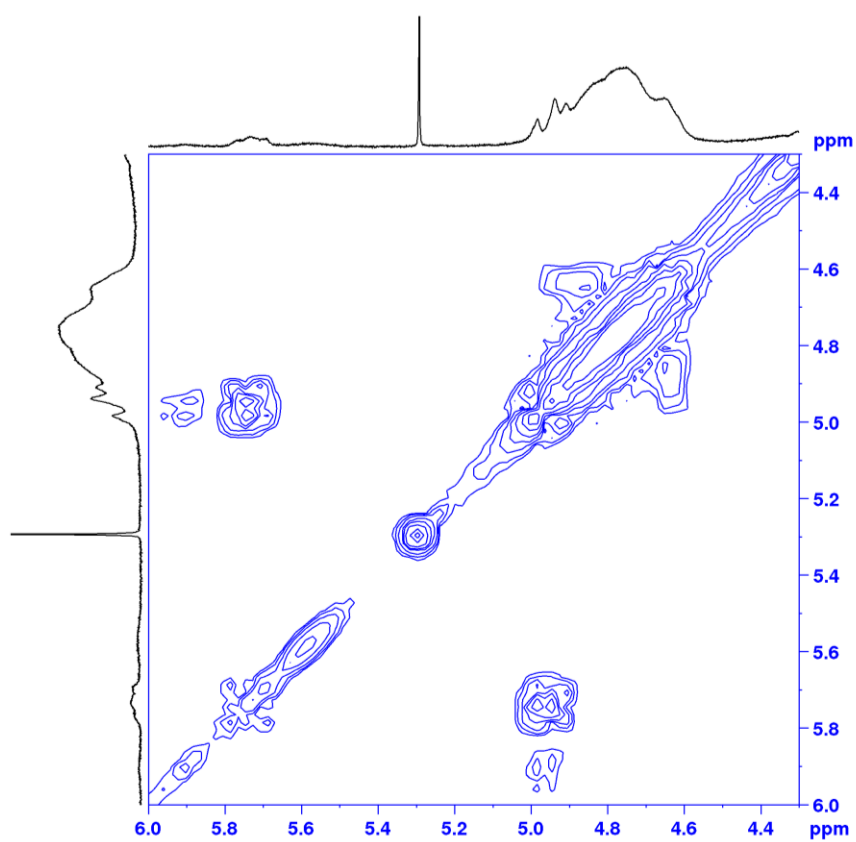

**Figure S57**  $^1\text{H}$ - $^1\text{H}$  COSY NMR of poly(**BET-alt-PA**) from 6.0 to 4.3 ppm (400 MHz, rt,  $\text{CDCl}_3$ ).



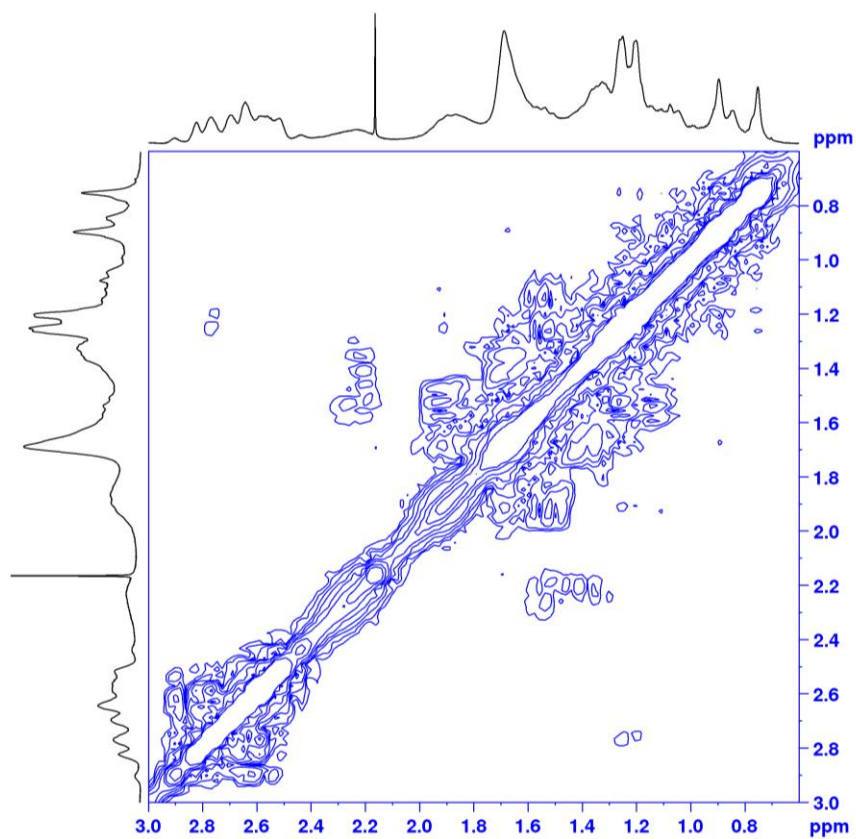

**Figure S58**  $^1\text{H}$ - $^1\text{H}$  COSY NMR of poly(**BET-alt-PA**) from 3.0 to 0.6 ppm (400 MHz, rt,  $\text{CDCl}_3$ ).

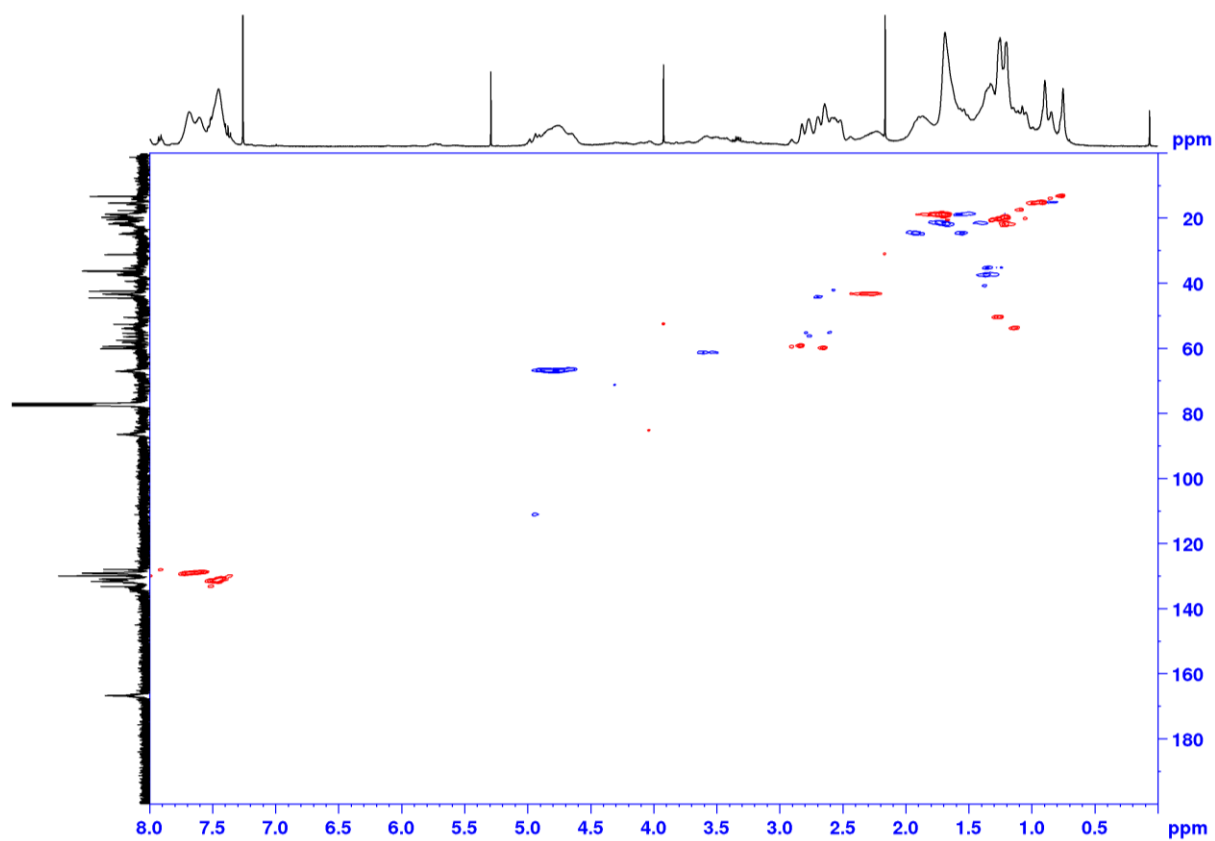

**Figure S59**  $^1\text{H}$ - $^{13}\text{C}$  HSQC NMR of poly(**BET-alt-PA**) (400 MHz, rt,  $\text{CDCl}_3$ ).

## Gas chromatography–mass spectrometry analyses of BEM

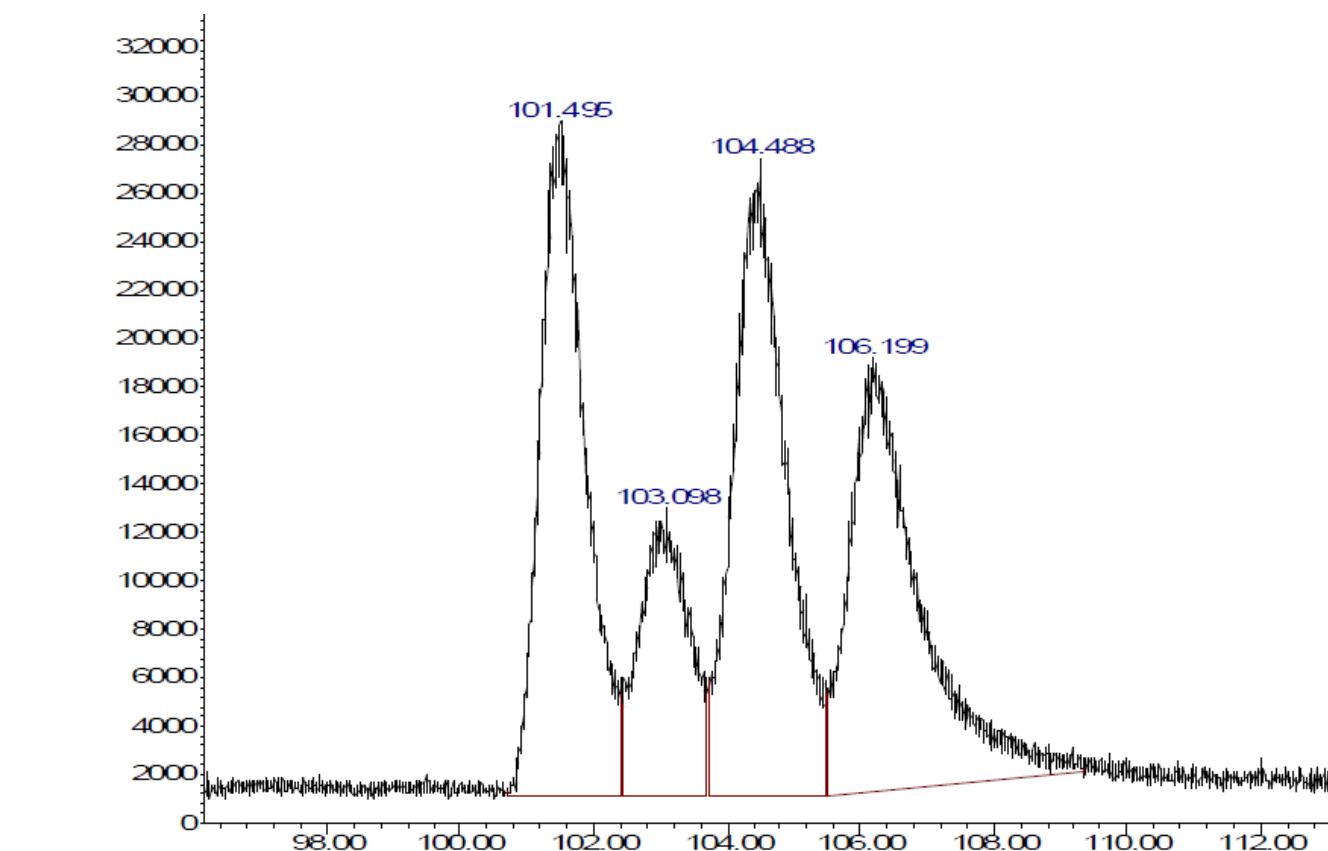

Time→

| peak # | R.T. min | first scan | max scan | last scan | PK TY | peak height | corr. area | corr. % | % of max. | % of total |
|--------|----------|------------|----------|-----------|-------|-------------|------------|---------|-----------|------------|
|--------|----------|------------|----------|-----------|-------|-------------|------------|---------|-----------|------------|

|   |         |       |       |       |   |       |          |         |         |
|---|---------|-------|-------|-------|---|-------|----------|---------|---------|
| 1 | 101.495 | 17150 | 17287 | 17447 | M | 28117 | 12877348 | 92.14%  | 28.208% |
| 2 | 103.098 | 17449 | 17567 | 17674 | M | 11948 | 5901370  | 42.22%  | 12.927% |
| 3 | 104.488 | 17676 | 17810 | 17984 | M | 26581 | 13976317 | 100.00% | 30.615% |
| 4 | 106.199 | 17986 | 18109 | 18656 | M | 17997 | 12896911 | 92.28%  | 28.251% |

Sum of corrected areas: 45651945

**Figure S60** GC-MS analysis of a 3,4-BEM/11,12-BEM mixture (49:51 ratio by NMR).

(all peaks show the same mass at  $m/z = 221.2$ .)

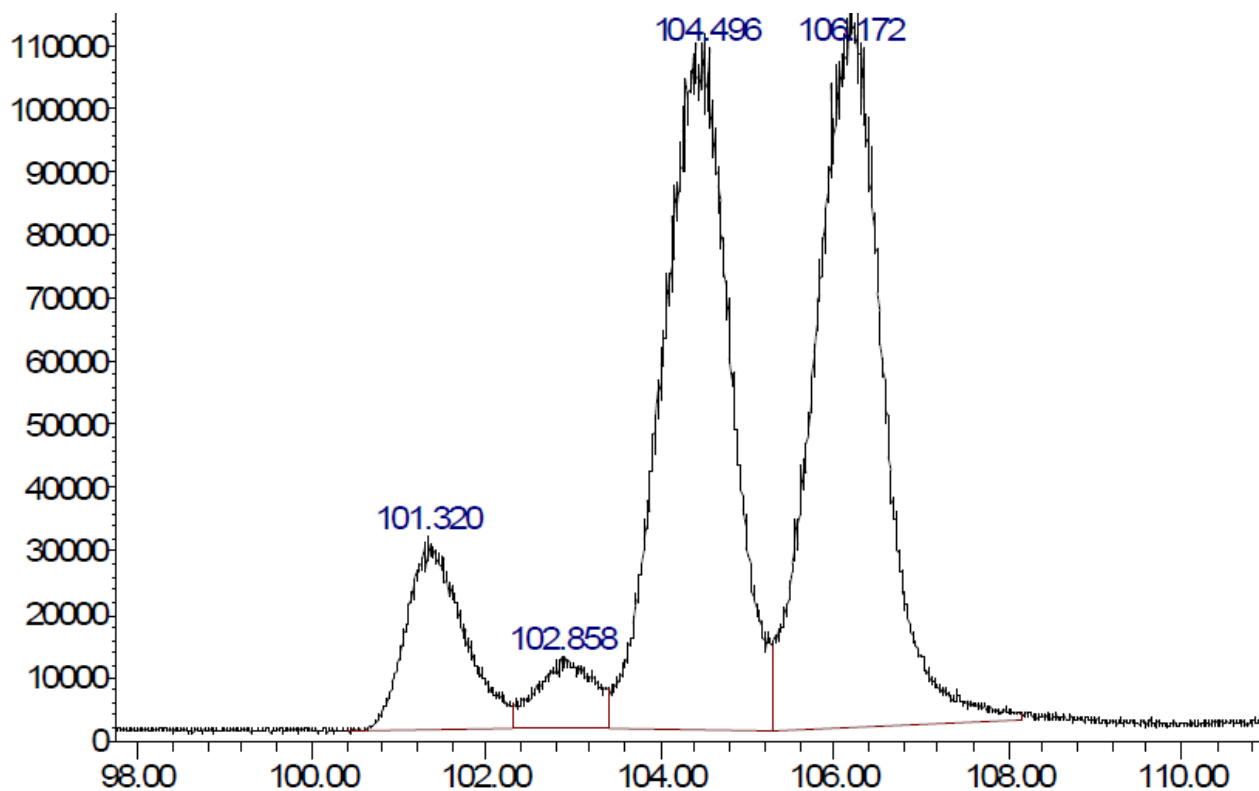

Time→

| peak # | R.T. min | first scan | max scan | last scan | PK TY | peak height | corr. area | corr. % | % of max. | % of total |
|--------|----------|------------|----------|-----------|-------|-------------|------------|---------|-----------|------------|
|--------|----------|------------|----------|-----------|-------|-------------|------------|---------|-----------|------------|

|   |         |       |       |       |   |        |          |         |         |
|---|---------|-------|-------|-------|---|--------|----------|---------|---------|
| 1 | 101.320 | 17095 | 17256 | 17430 | M | 30754  | 13648528 | 22.26%  | 9.884%  |
| 2 | 102.858 | 17430 | 17525 | 17620 | M | 11155  | 4757614  | 7.76%   | 3.445%  |
| 3 | 104.496 | 17620 | 17811 | 17951 | M | 110269 | 58369270 | 95.19%  | 42.268% |
| 4 | 106.172 | 17951 | 18104 | 18452 | M | 115306 | 61317358 | 100.00% | 44.403% |

Sum of corrected areas: 138092770

**Figure S61** GC-MS analysis of a 3,4-**BEM**/11,12-**BEM** mixture (20:80 ratio by NMR).

(all peaks show the same mass at  $m/z = 221.2$ .)

## Gel Permeation Chromatography of BE-Based Polyesters

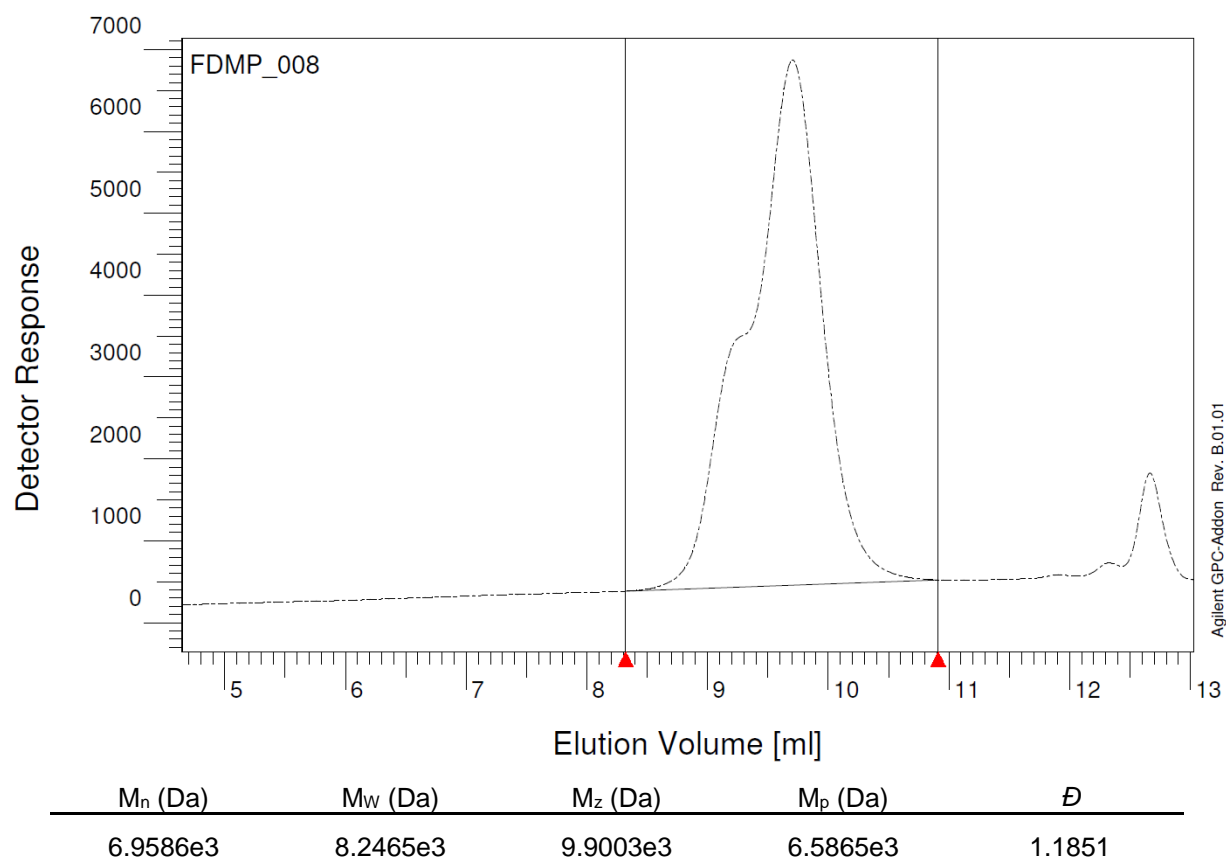

Figure S62 GPC trace of poly(**BEM-*alt*-PA**) sample related to entry 1 table 1.

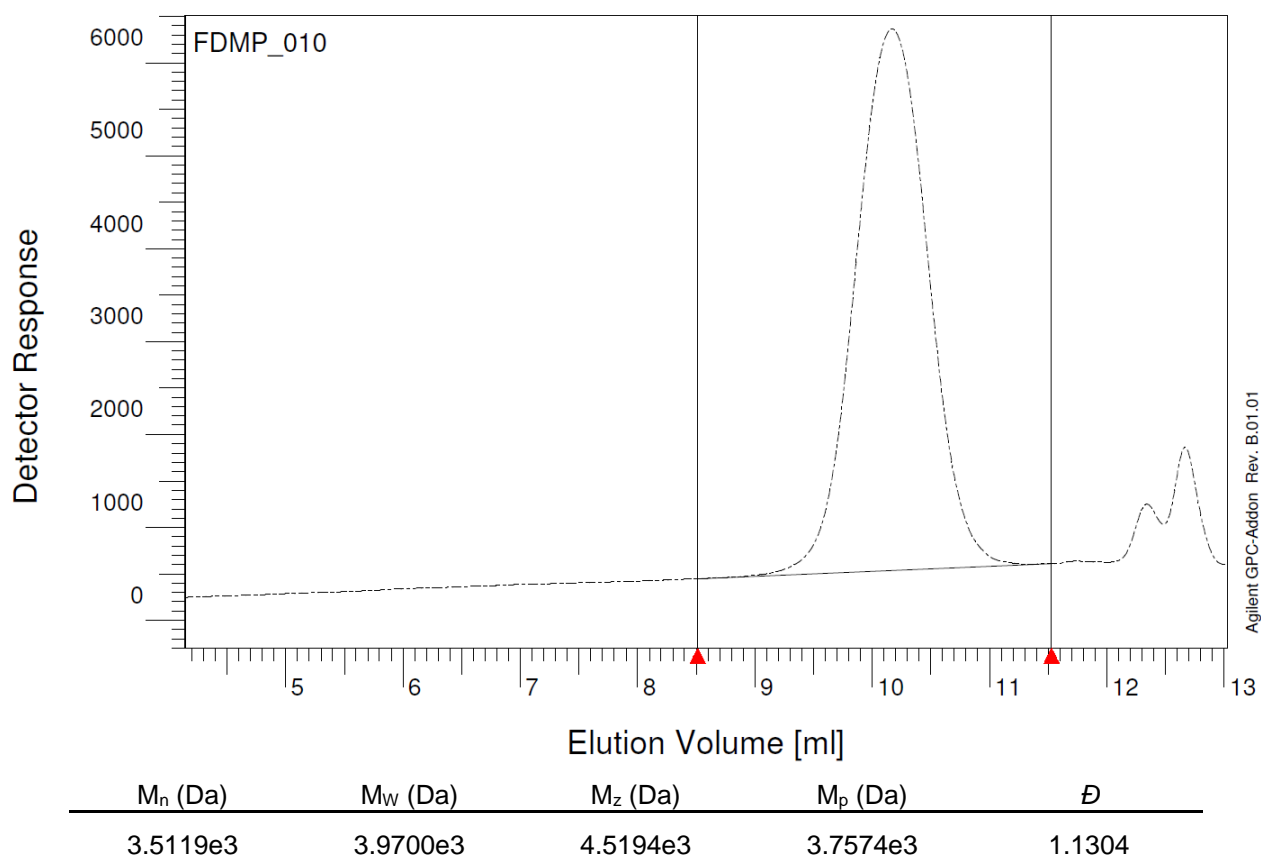

Figure S63 GPC trace of poly(**BEM-*alt*-PA**) sample related to entry 2 table 1.

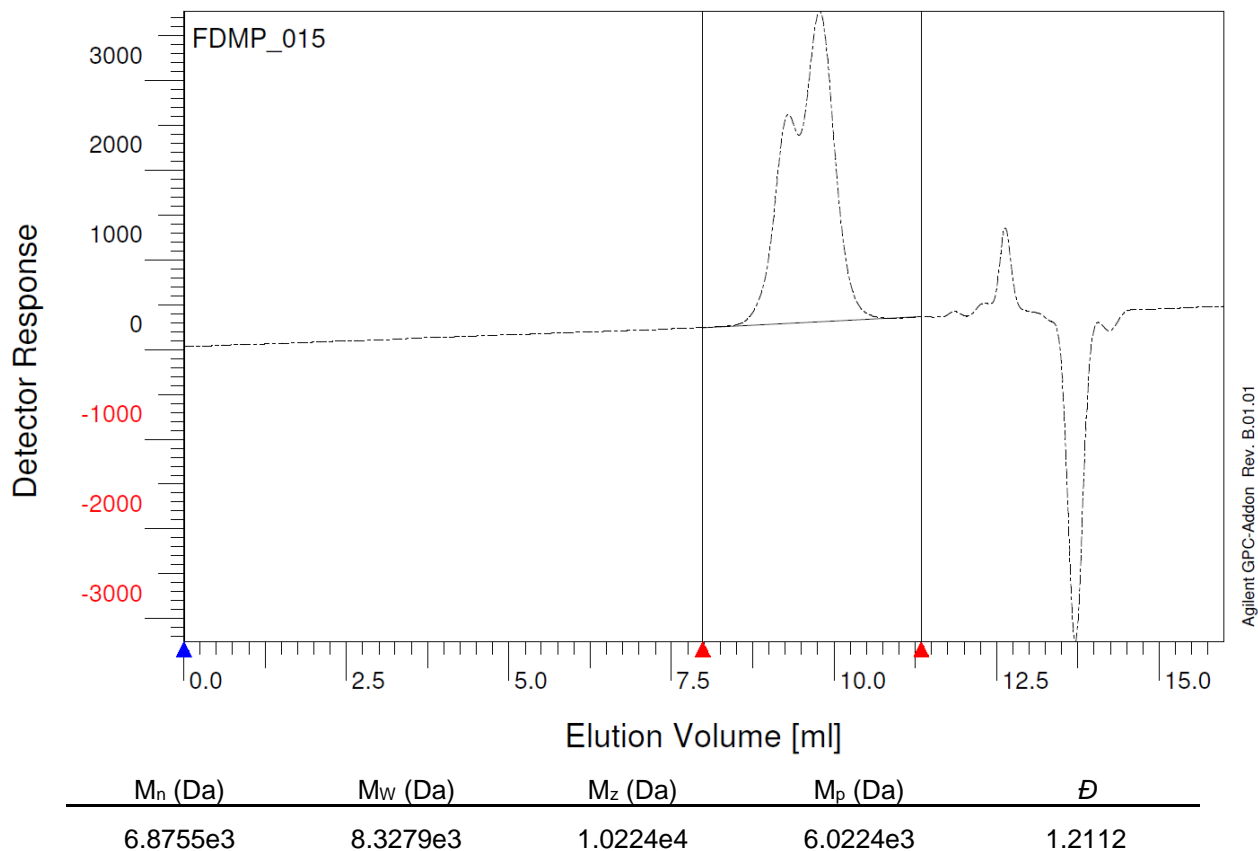

**Figure S64** GPC trace of poly(**BEM-*a*/t-PA**) sample related to entry 6 Table 1.

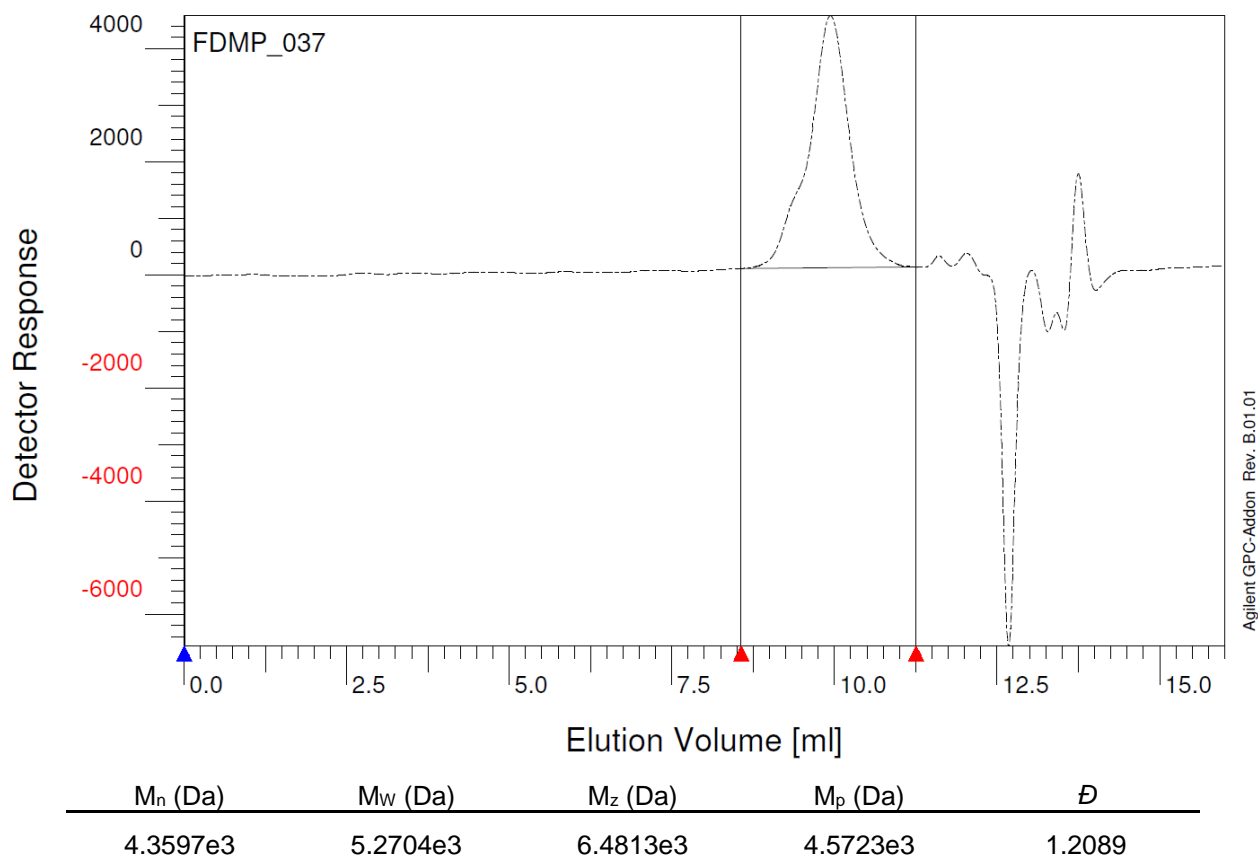

**Figure S65** GPC trace of poly(**BEM-*a*/t-PA**) sample related to entry 7 Table 1.

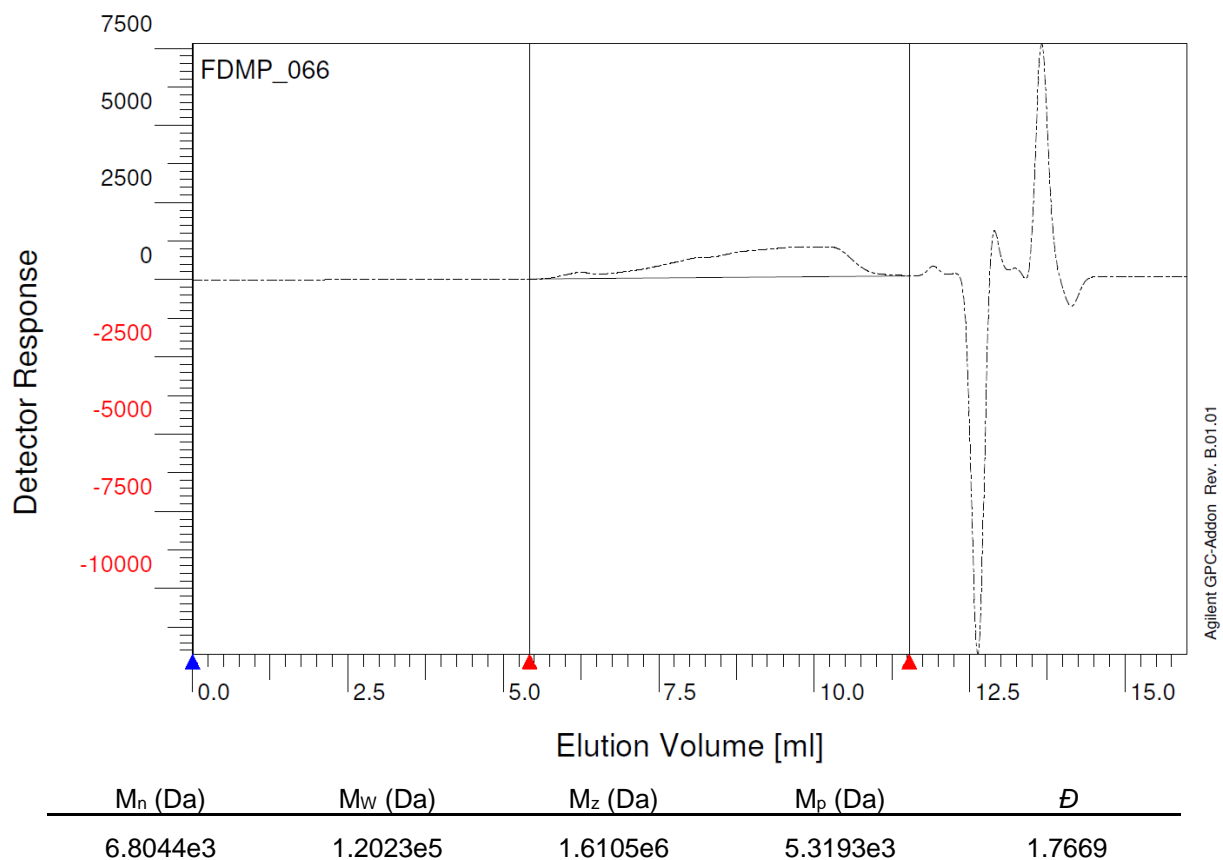

**Figure S66** GPC trace of THF-soluble fraction of crosslinked poly(**BED-*alt*-PA**) sample related to entry 8 Table 1.

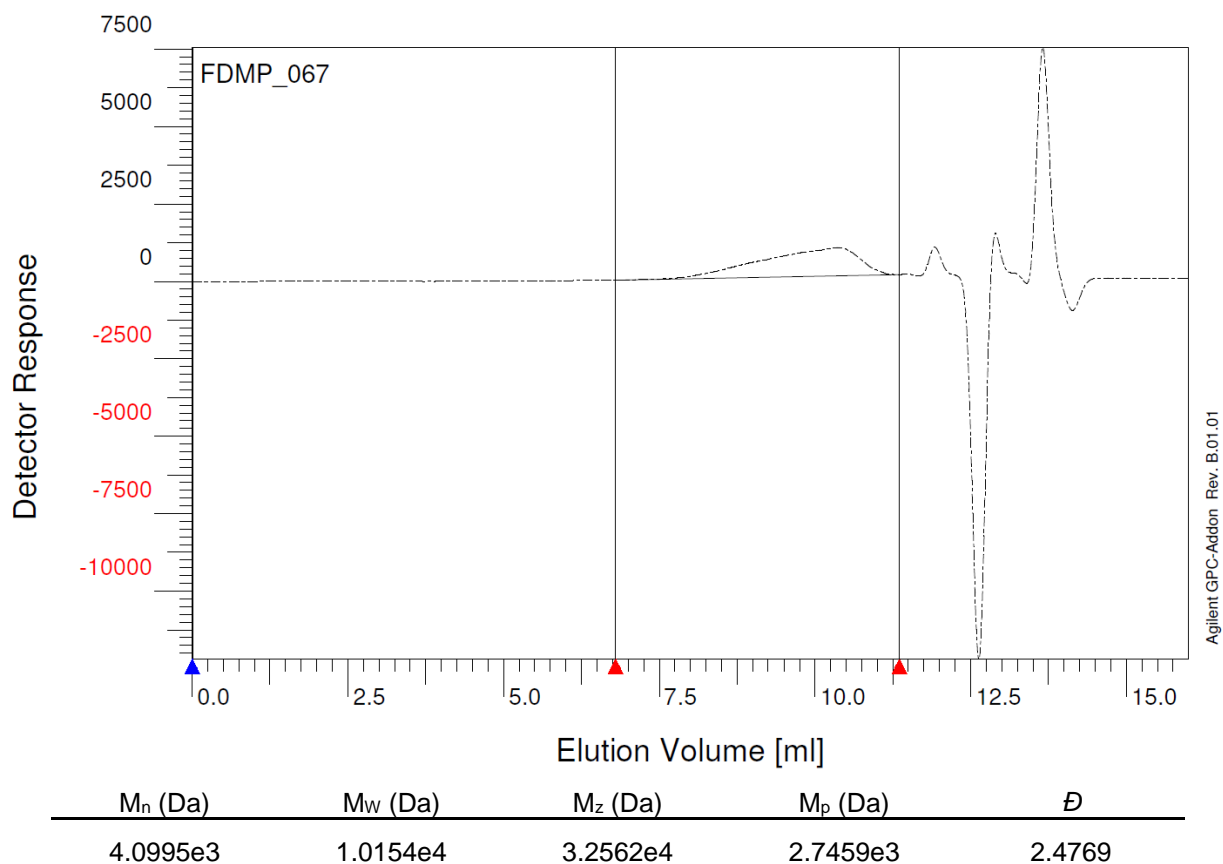

**Figure S67** GPC trace of THF-soluble fraction of crosslinked poly(**BED-*alt*-PA**) sample related to entry 11 Table 1.

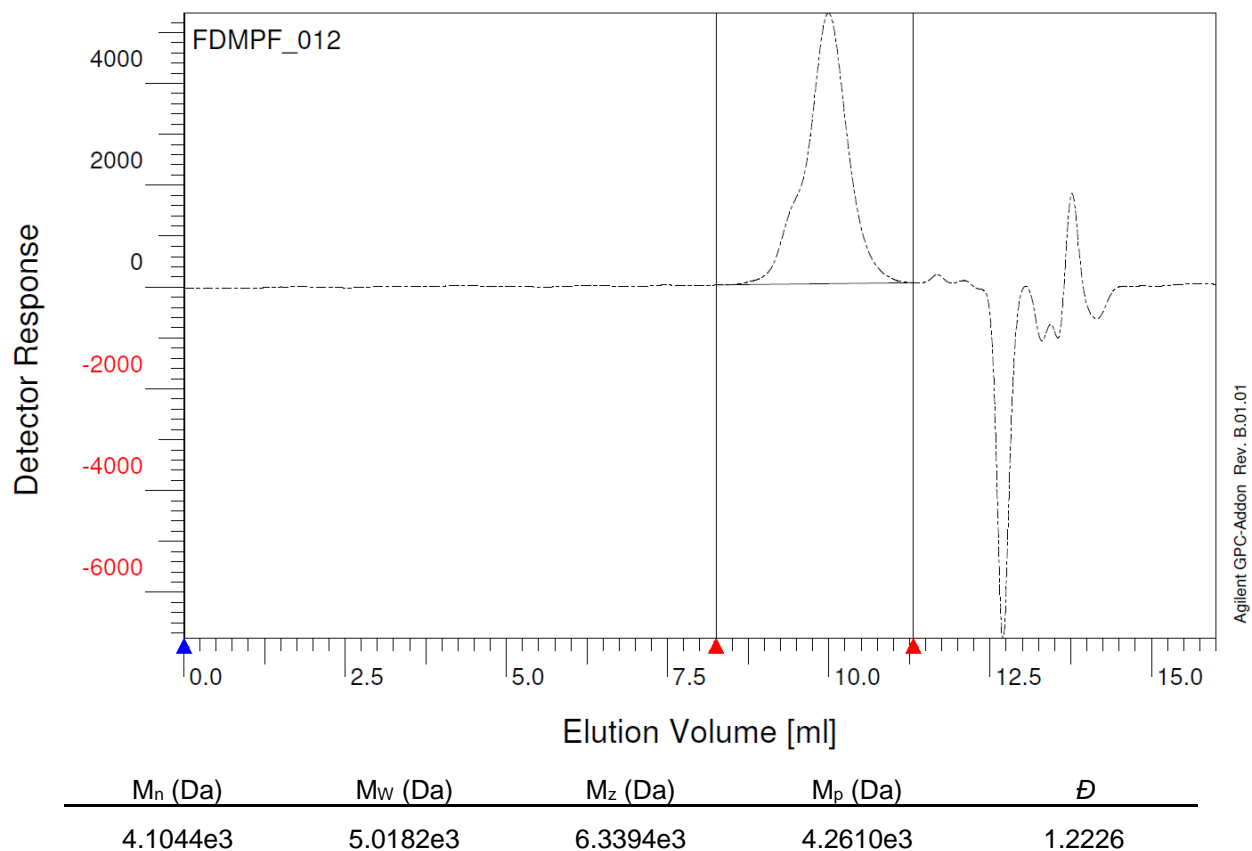

Figure S68 GPC trace of poly(**BED-*alt*-PA**).

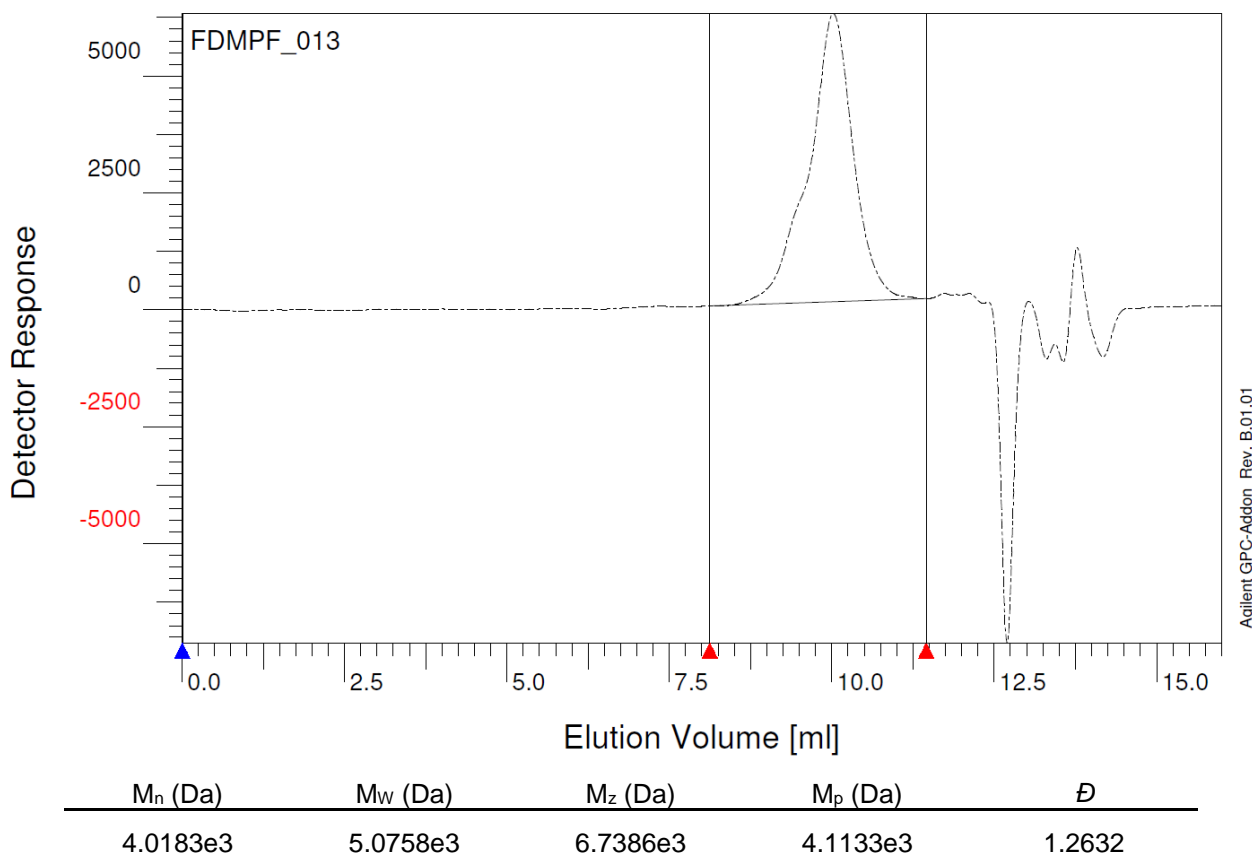

Figure S69 GPC trace of poly(**BET-*alt*-PA**).

# Matrix-Assisted Laser Desorption/Ionization Mass Spectrometry of BE-Based Polyesters

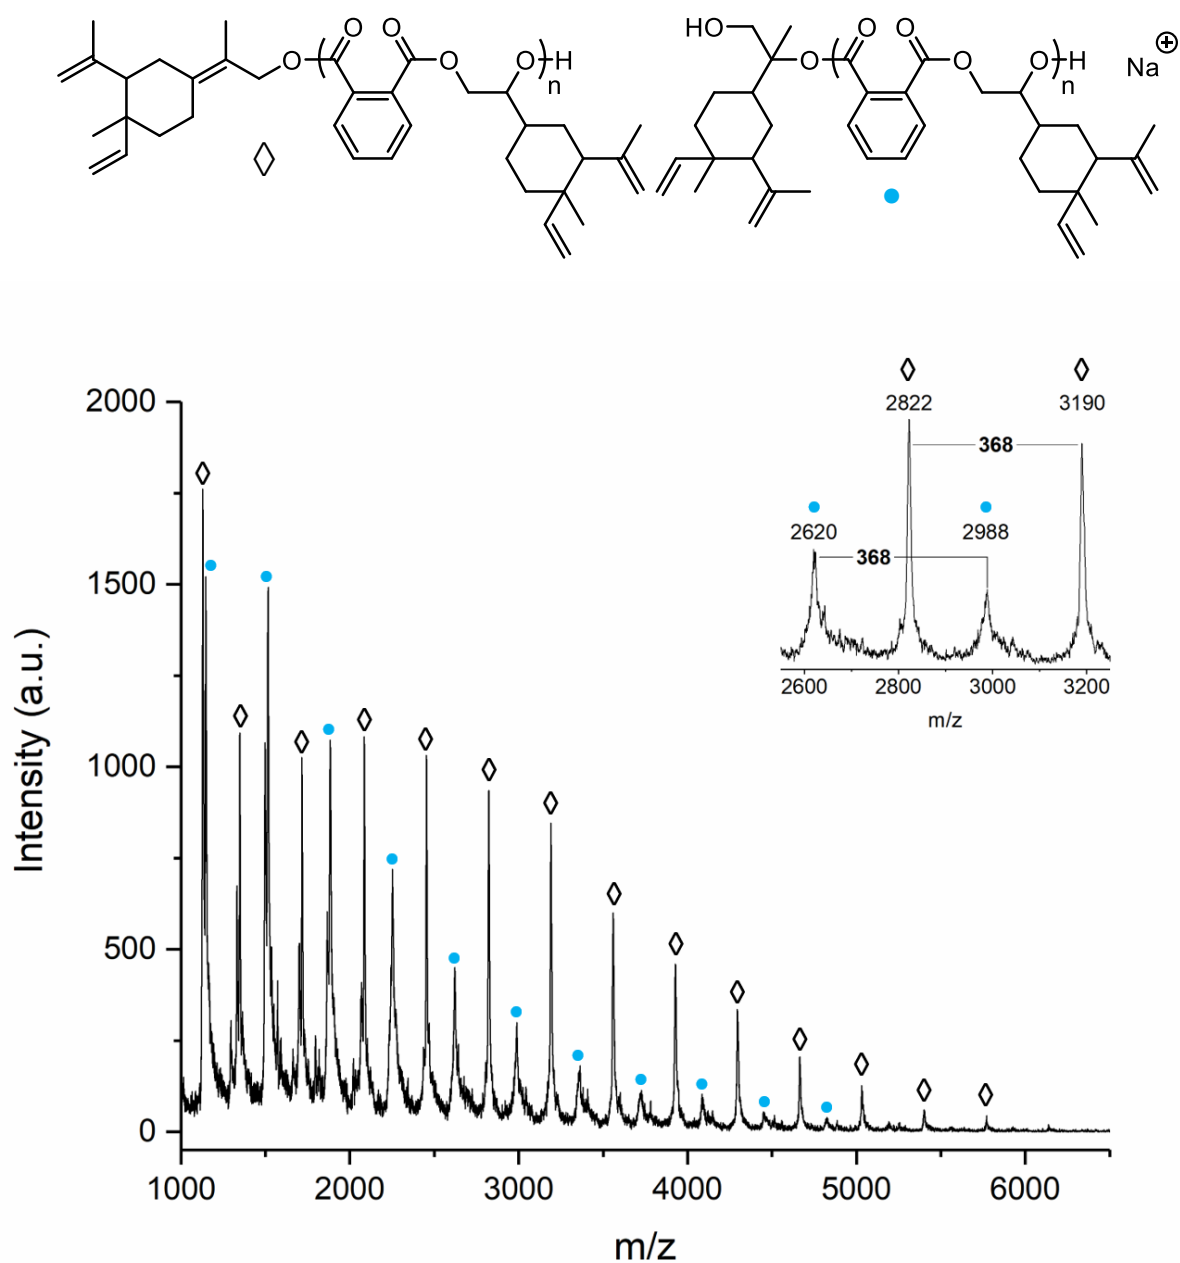

**Figure S70** MALDI-TOF spectrum of poly(**BEM**-*alt*-**PA**) sample related to entry 7 table 1.



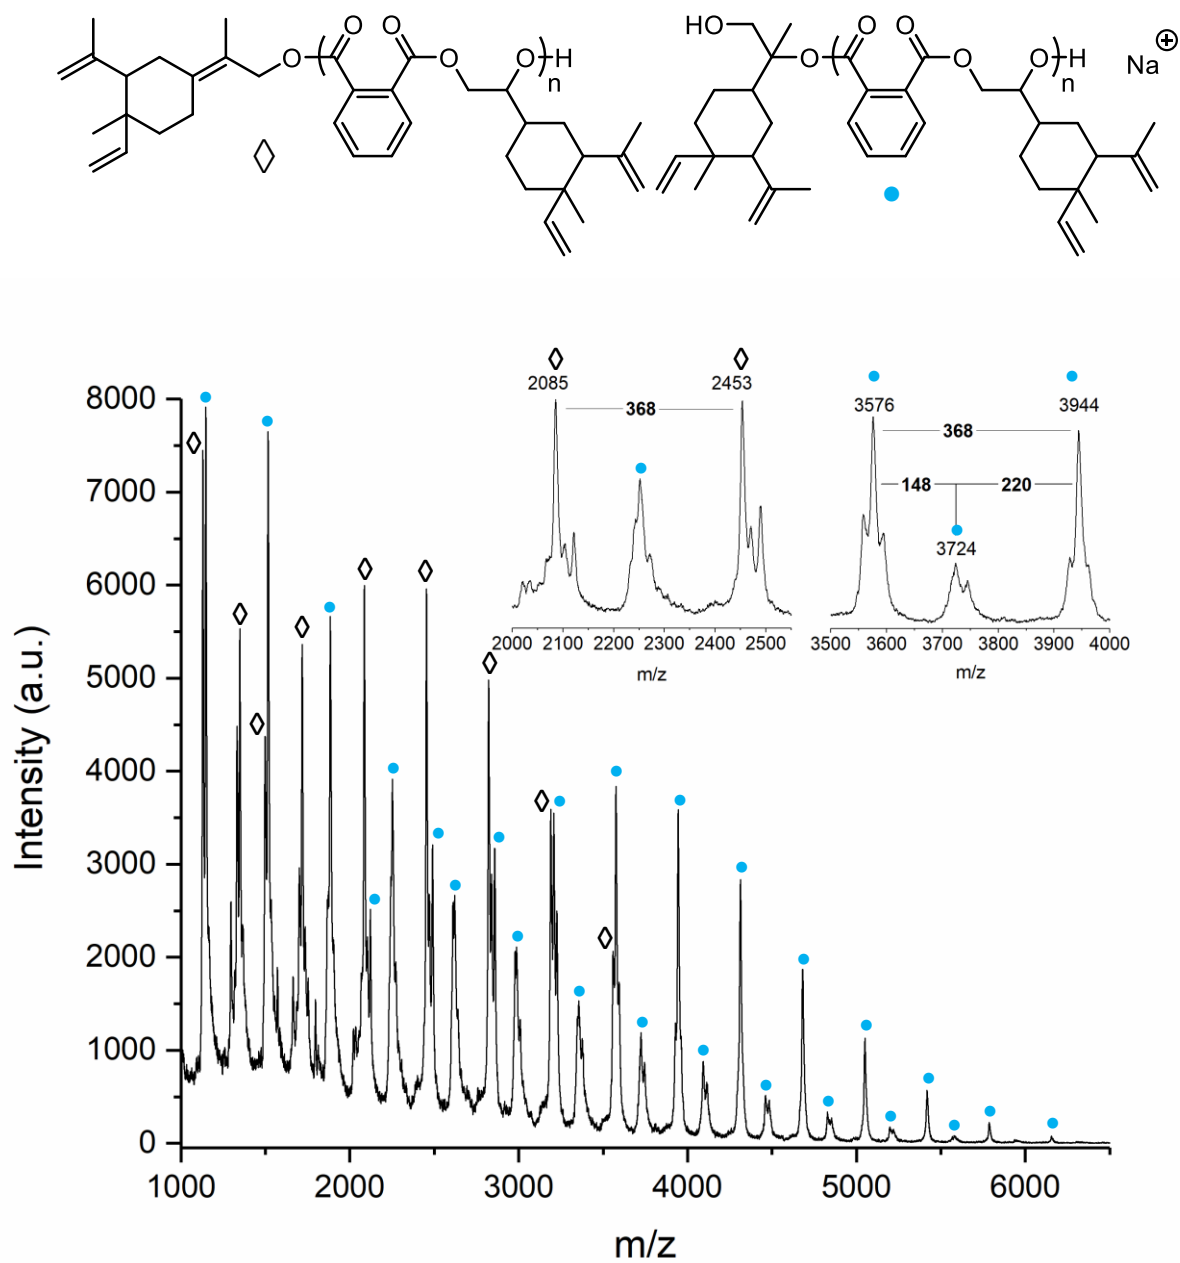

**Figure S71** MALDI-TOF spectrum of poly(BEM-*alt*-PA) sample related to entry 2 Table 1.

## Differential Scanning Calorimetry of BE-Based Polyesters

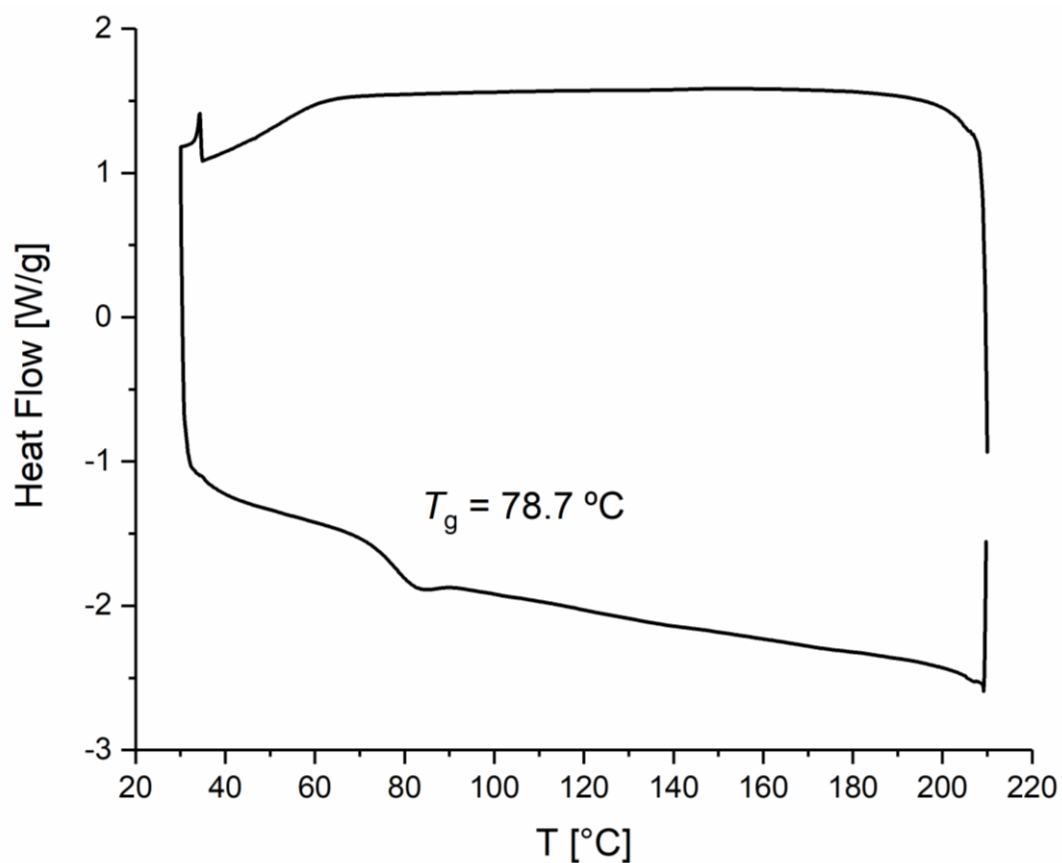

**Figure S72** DSC thermogram of poly(**BEM**-*alt*-**PA**) sample related to entry 6 Table 1.

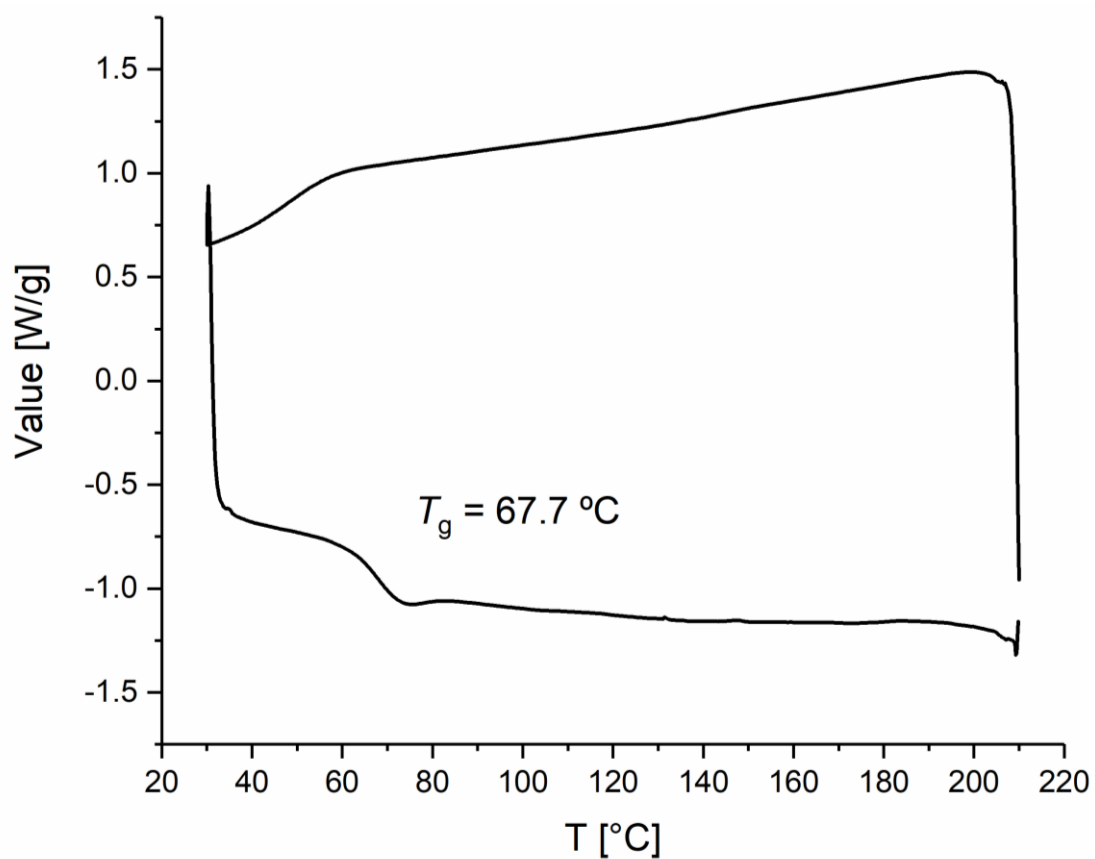

**Figure S73** DSC thermogram of poly(**BEM**-*alt*-**PA**) sample related to entry 7 Table 1.

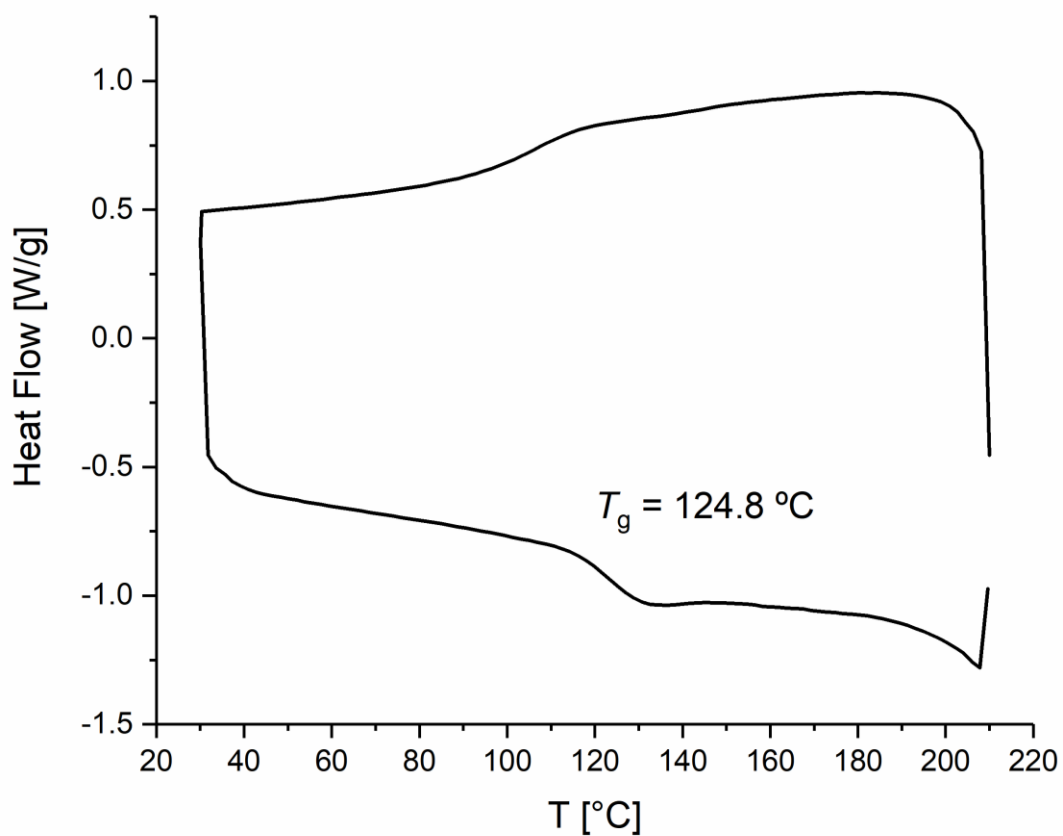

**Figure S74** DSC thermogram of crosslinked poly(**BED-*alt*-PA**) sample related to entry 8 Table 1.

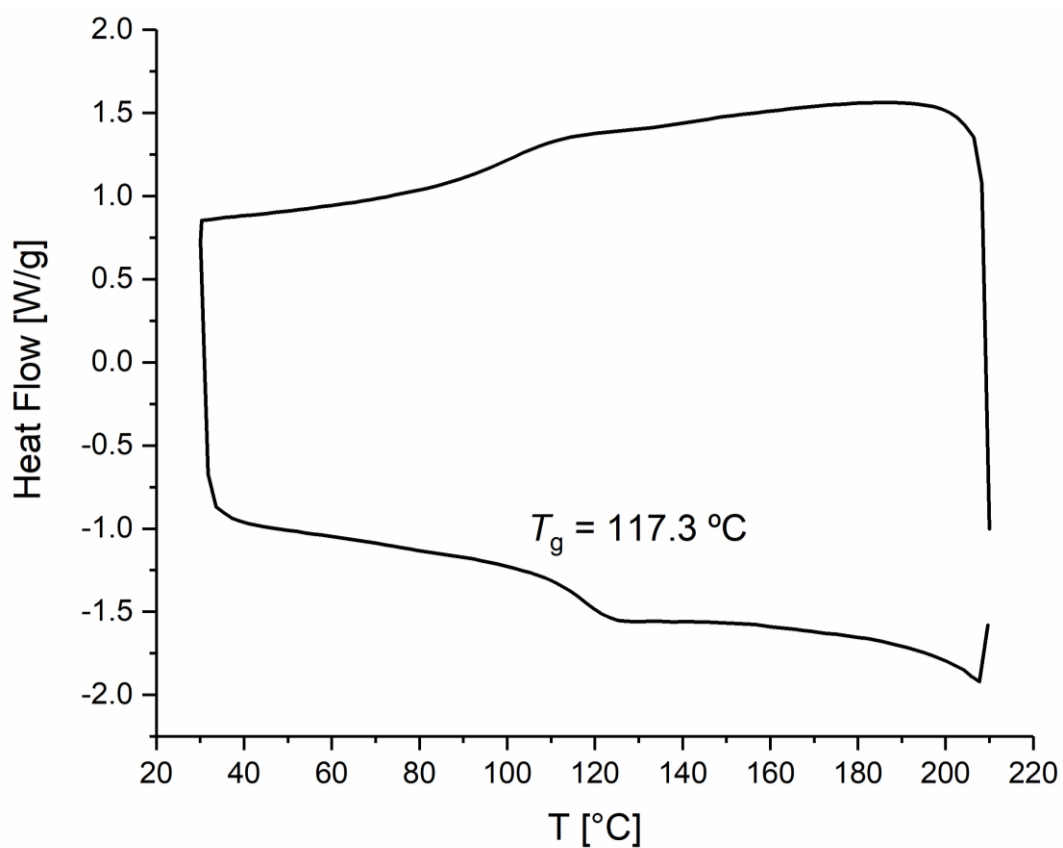

**Figure S75** DSC thermogram of crosslinked poly(**BED-*alt*-PA**) sample related to entry 11 Table 1.

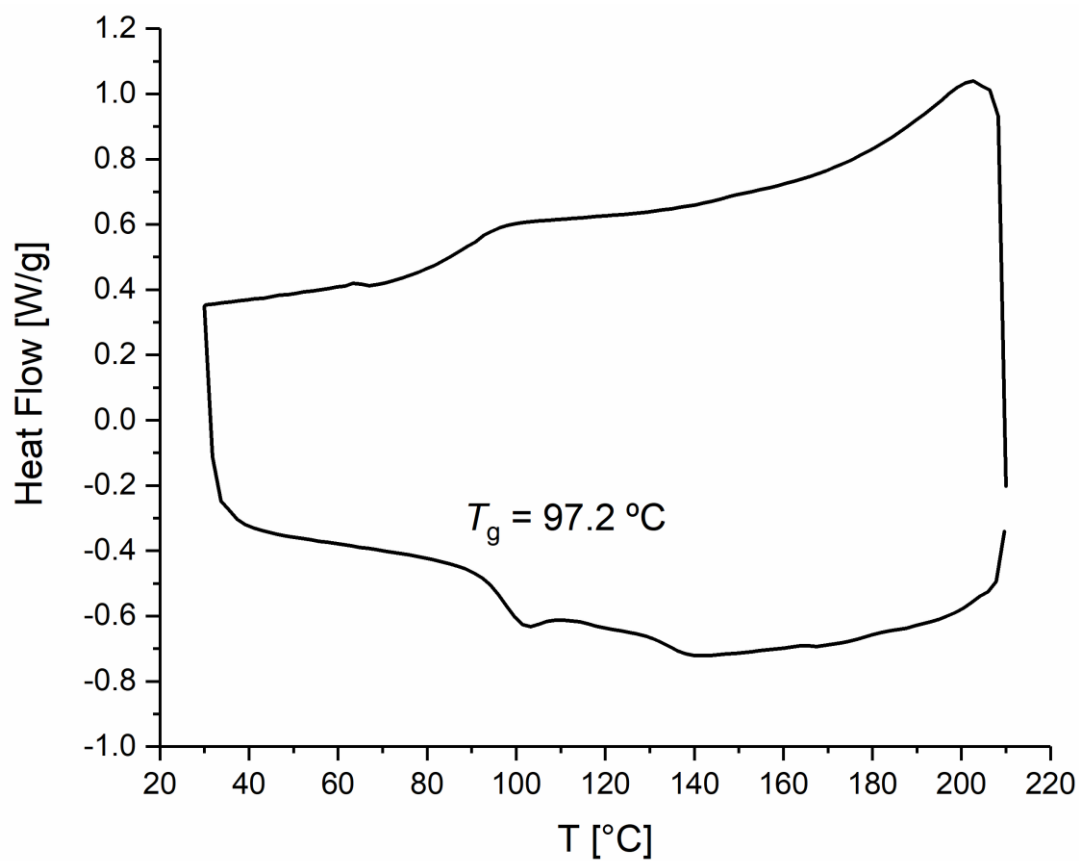

**Figure S76** DSC thermogram of poly(**BED-alt-PA**).

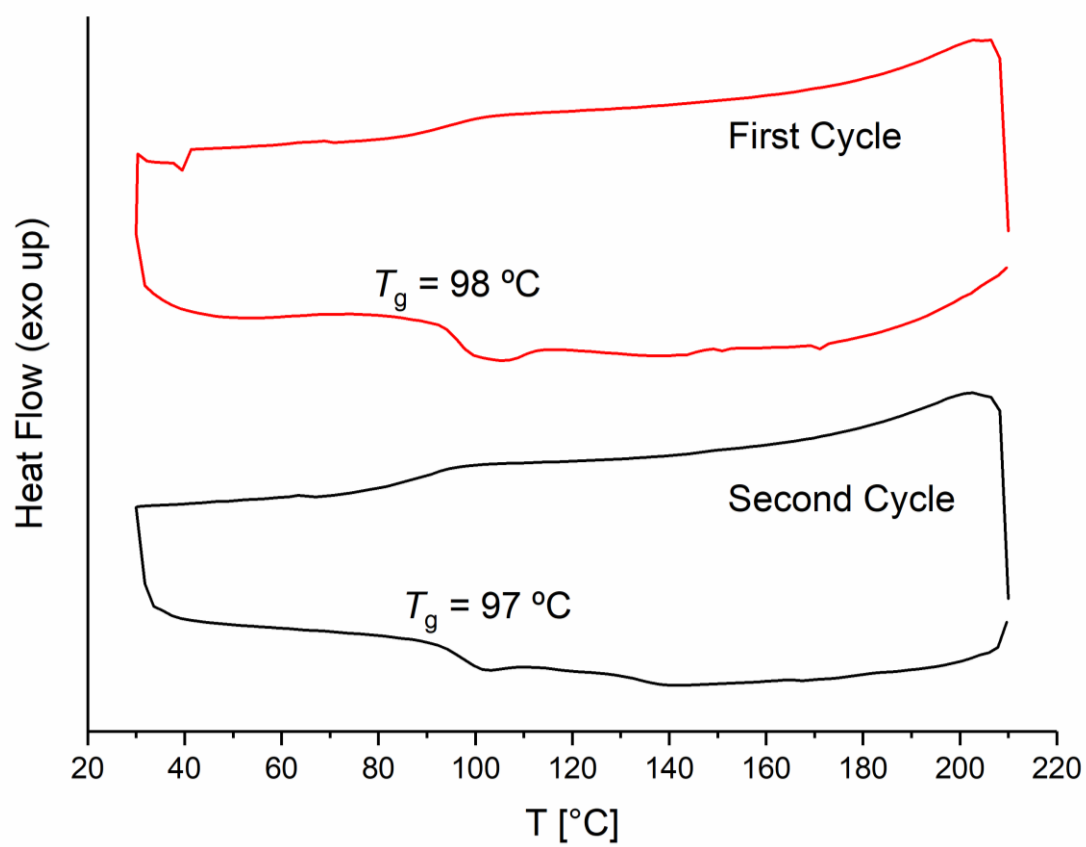

**Figure S77** Comparison of first and second cycle of DSC thermogram of poly(**BED-alt-PA**).

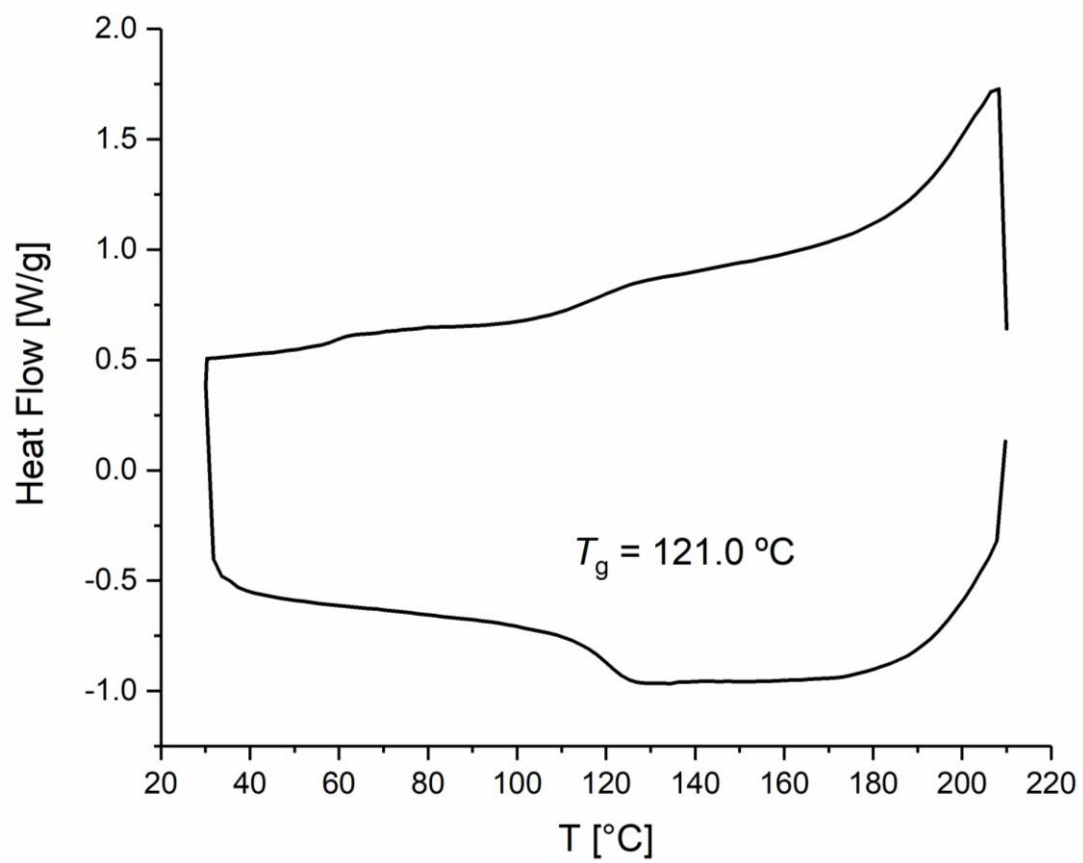

**Figure S78** DSC thermogram of poly(**BET**-*alt*-**PA**).

## Thermogravimetric Analyses of BE-Based Polyesters

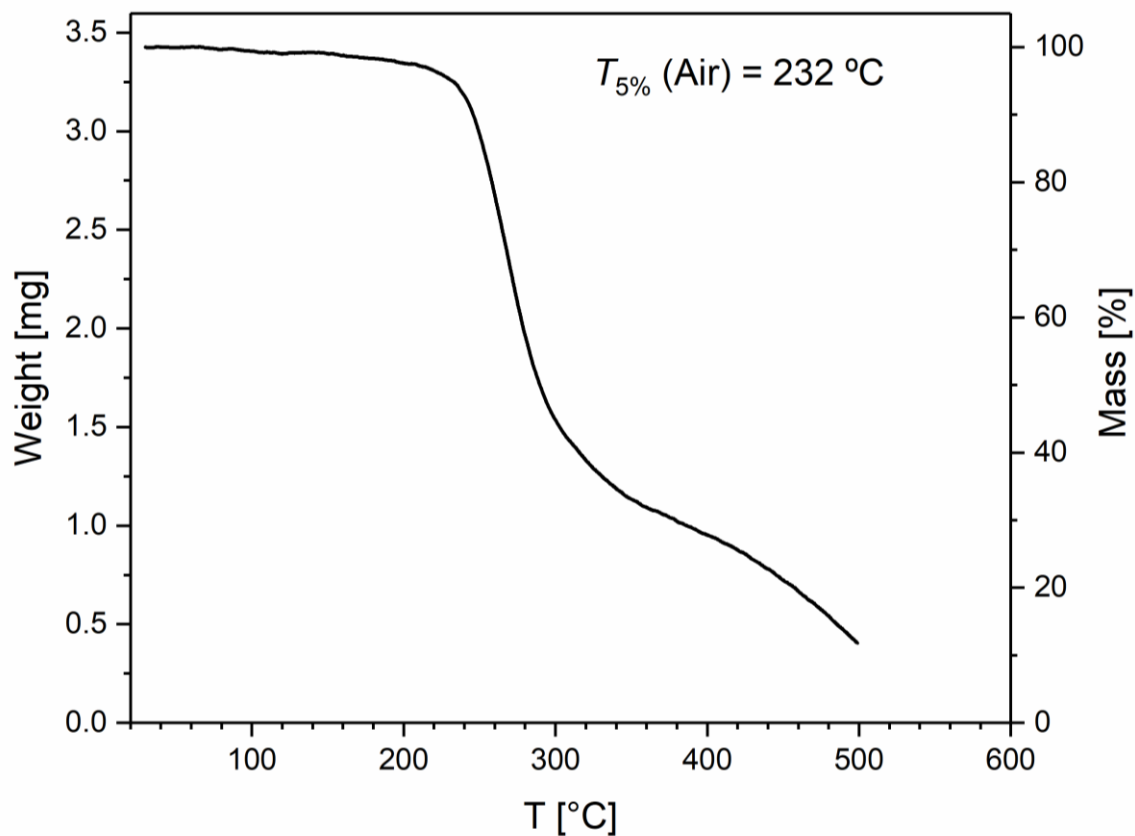

**Figure S79** TGA thermogram of poly(BEM-*alt*-PA) sample related to entry 6 Table 1.

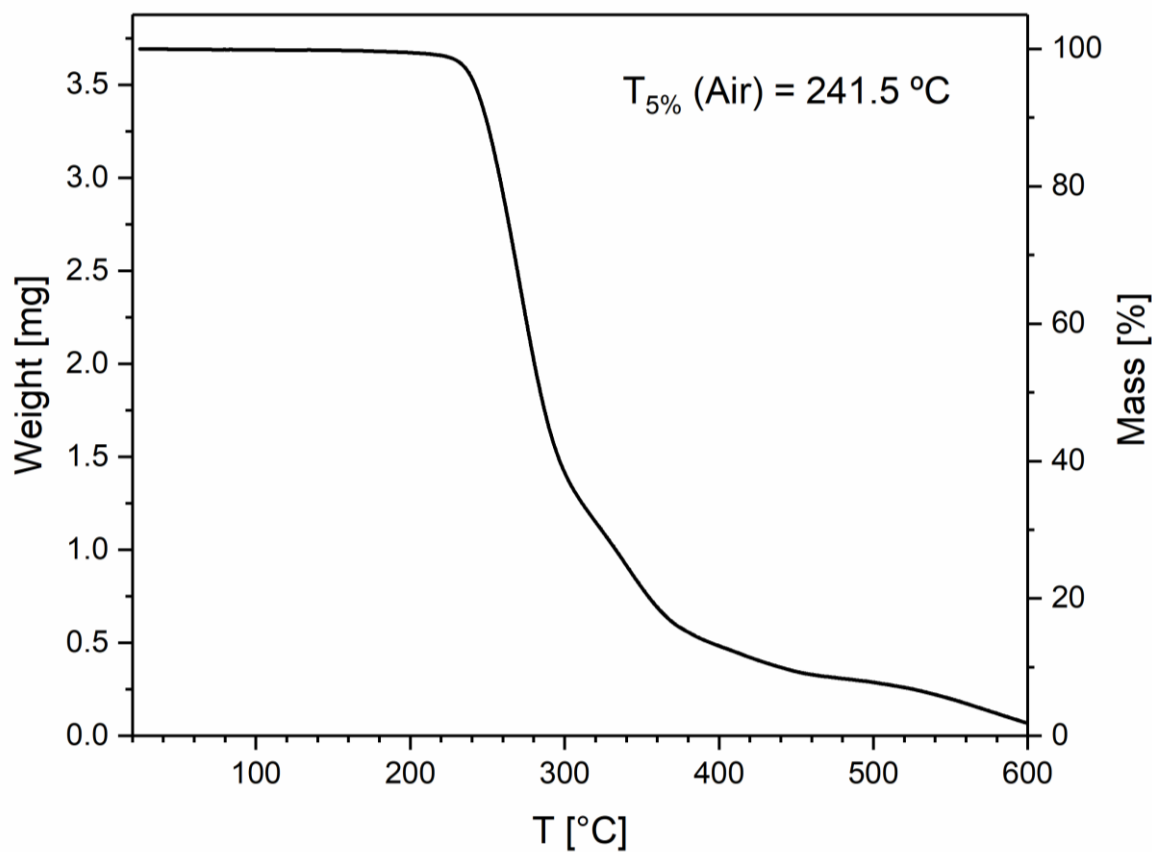

**Figure S80** TGA thermogram of poly(BED-*alt*-PA) sample related to entry 7 Table 1.

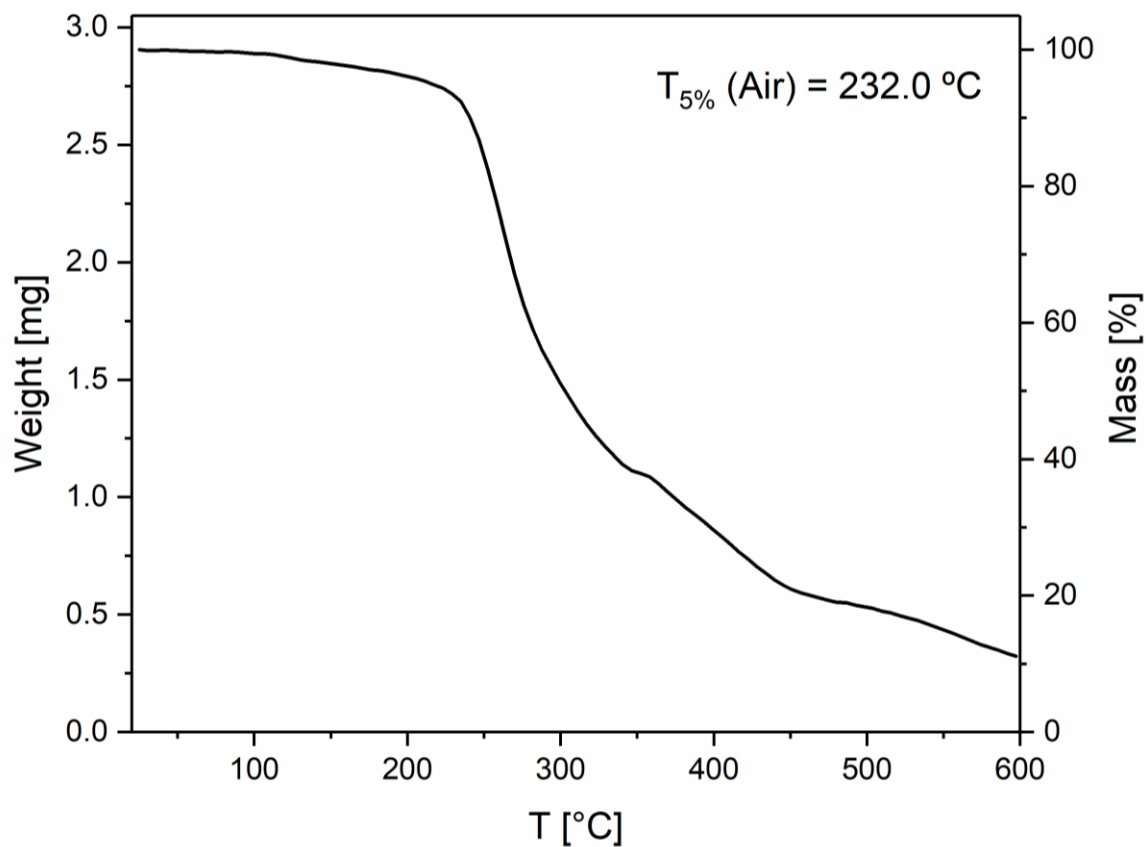

**Figure S81** TGA thermogram of crosslinked poly(**BED-*alt*-PA**) sample related to entry 8 Table 1.

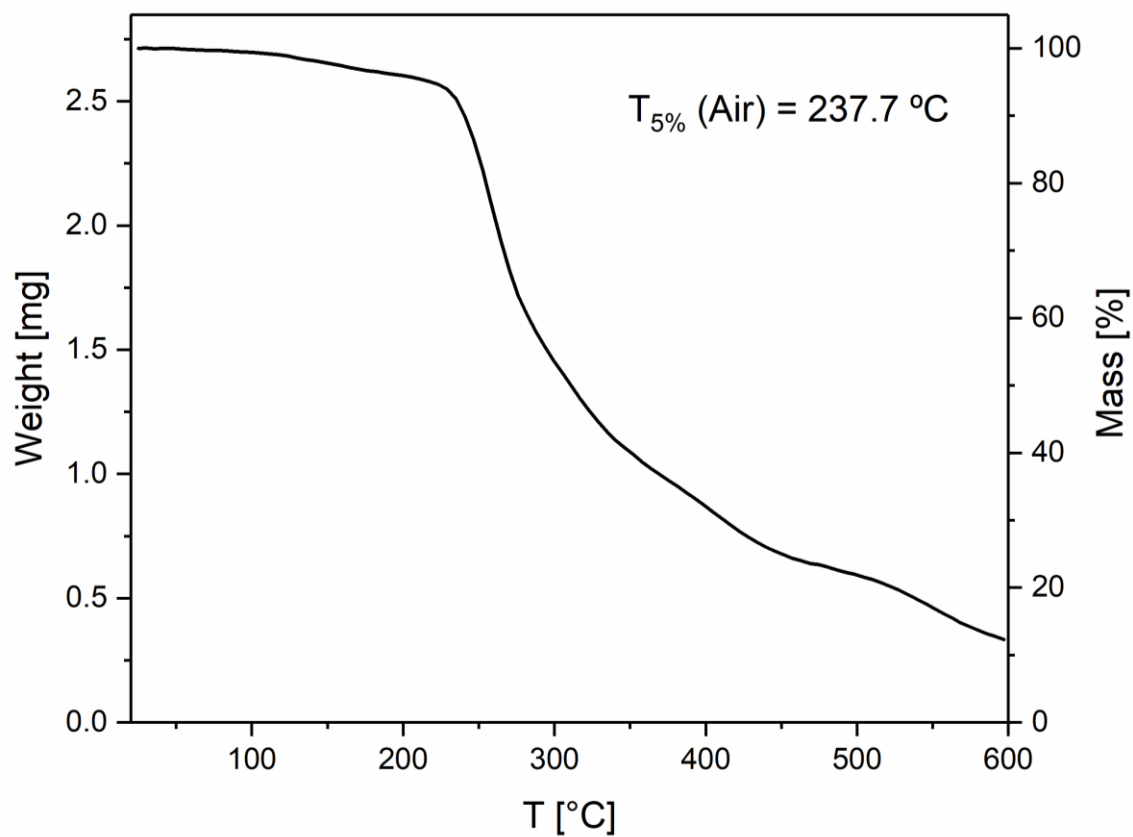

**Figure S82** TGA thermogram of crosslinked poly(**BED-*alt*-PA**) sample related to entry 11 Table 1.

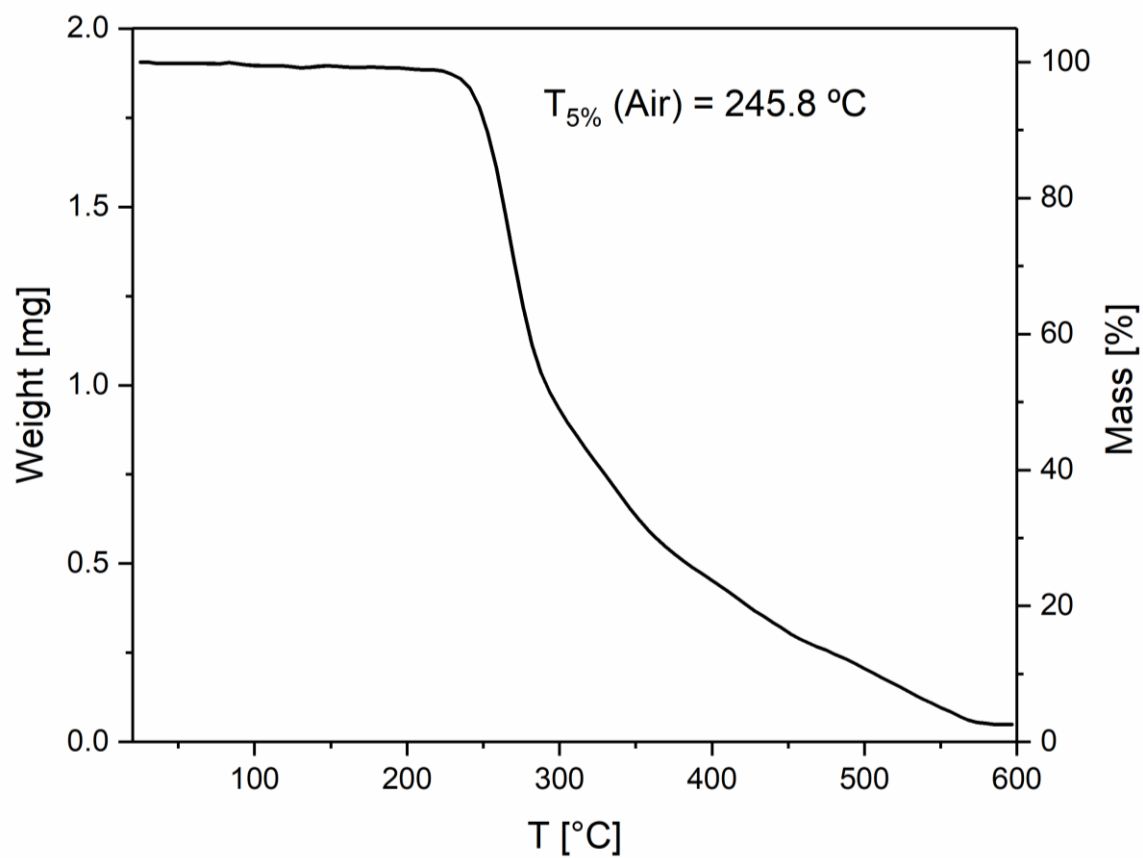

**Figure S83** TGA thermogram of poly(BED-*alt*-PA).

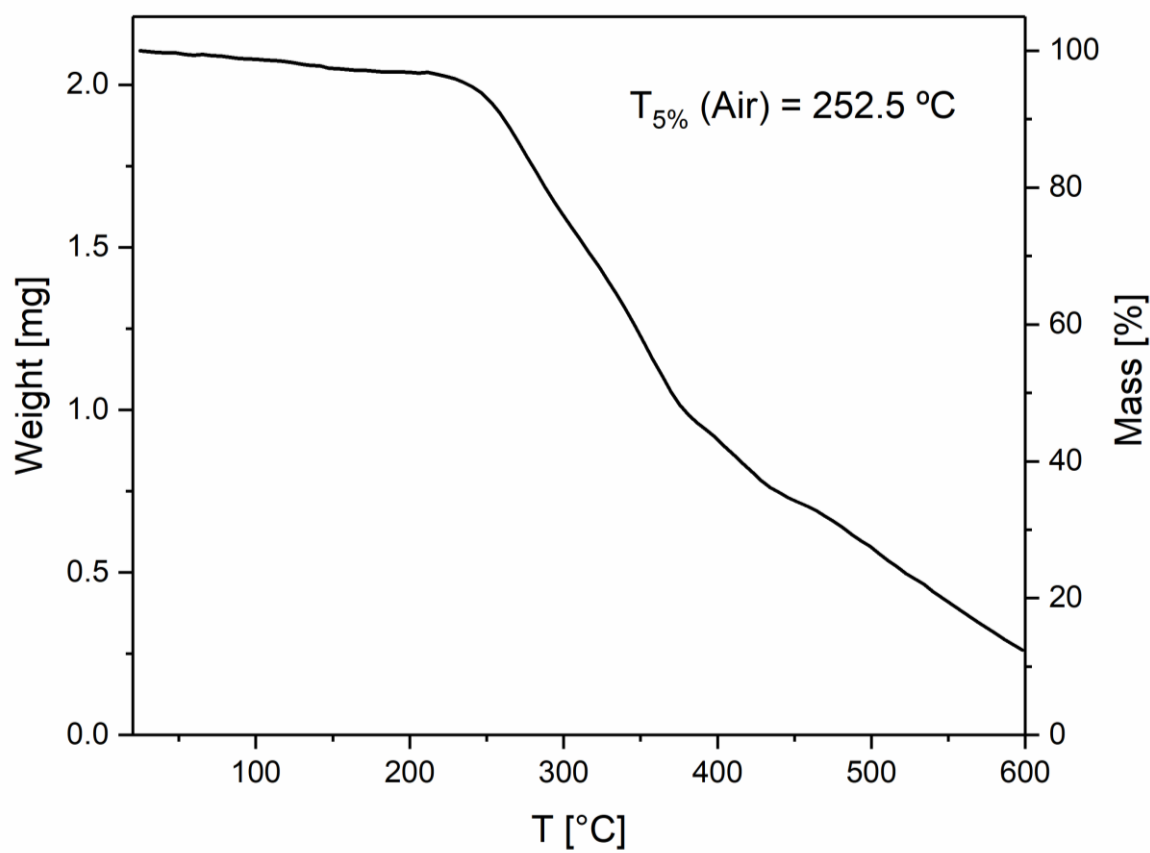

**Figure S84** TGA thermogram of poly(BET-*alt*-PA).



## References

1. <https://www.isobionics.com/index.html>
2. Whiteoak, C. J.; Martin, E.; Martínez Belmonte, M.; Benet-Buchholz, J.; Kleij, A. W. An Efficient Iron Catalyst for the Synthesis of Five- and Six-membered Organic Carbonates under Mild Conditions. *Adv. Synth. Catal.* **2012**, *354*, 469–476.
3. Whiteoak, C. J.; Kielland, N.; Laserna, V.; Castro-Gómez, F.; Martín, E.; Escudero-Galán, E. C.; Bo, C.; Kleij, A. W. Highly Active Aluminium Catalysts for the Formation of Organic Carbonates from CO<sub>2</sub> and Oxiranes. *Chem. Eur. J.* **2014**, *20*, 2264–2275.
